# Supplementary material for: Significant Modules and Biological Processes between Active Components of Salvia miltiorrhiza Depside Salt and Aspirin
Source: Hindawi journal article supplement (doi:10.1155/2016/3439521), 2016-01-01
Supplement: f1 [file 3439521.f1.pdf]

**Table 1**

**Genes related to active compounds of salvianolate and aspirin, overlapping genes of them**

|                                                          |                                                                                                                                                                                                                                                                                                                                                                                                                                                                                                                                                                                                                                                                                                                                                                                                                                                                                                                                                                                                                                                                                                                                                                                                                                                                                                                                                                                                                                                                                                                                                                                                                                                                                                                                                                                                                                                                                                                                                                                                                                                                                                                                                                                                                                                                                                                                                                                                                                                                                                                                                                                                         |
|----------------------------------------------------------|---------------------------------------------------------------------------------------------------------------------------------------------------------------------------------------------------------------------------------------------------------------------------------------------------------------------------------------------------------------------------------------------------------------------------------------------------------------------------------------------------------------------------------------------------------------------------------------------------------------------------------------------------------------------------------------------------------------------------------------------------------------------------------------------------------------------------------------------------------------------------------------------------------------------------------------------------------------------------------------------------------------------------------------------------------------------------------------------------------------------------------------------------------------------------------------------------------------------------------------------------------------------------------------------------------------------------------------------------------------------------------------------------------------------------------------------------------------------------------------------------------------------------------------------------------------------------------------------------------------------------------------------------------------------------------------------------------------------------------------------------------------------------------------------------------------------------------------------------------------------------------------------------------------------------------------------------------------------------------------------------------------------------------------------------------------------------------------------------------------------------------------------------------------------------------------------------------------------------------------------------------------------------------------------------------------------------------------------------------------------------------------------------------------------------------------------------------------------------------------------------------------------------------------------------------------------------------------------------------|
| <b>Genes related to active compounds of salvianolate</b> | JUN, NOS3, AKR1B1, NOS2, SOD1, PTGER3, PTGER2, MMP2, VCAM1, CASP3, MAPK8, IFNG, TNF, MMP1, EDN1, SIRT1, SHC1, SIK2, SERPINE1, MAPK1, TGFB1, ATF4, ATF6, APP, XDH, PTPN1, SPTLC2, PLOD1, SPTLC1, SLC16A1, ERVK-6, ALOX5, CCL11, DYT10, LCK, CXCL2, PTGS2, CCR3, FOS, IL1B, ITK, PLCG1, CREB1, IL8, BCL2, ZAP70, NFKB1, MAP2K1, IKBKB, RELA, GRB2, EEF1A1, IL2, FYN, MCL1                                                                                                                                                                                                                                                                                                                                                                                                                                                                                                                                                                                                                                                                                                                                                                                                                                                                                                                                                                                                                                                                                                                                                                                                                                                                                                                                                                                                                                                                                                                                                                                                                                                                                                                                                                                                                                                                                                                                                                                                                                                                                                                                                                                                                                 |
| <b>Aspirin-related genes</b>                             | PTGER2, TBX21, PTGS1, CACNG6, RGS7BP, COL26A1, LTC4S, P2RY12, SELP, CPOX, PTGS2, COX5A, FPR2, RNASE3, GP1BA, P2RY1, UGT1A6, ALOX5, APOH, CYSLTR1, CANT1, PECAM1, PPBP, MS4A2, TBXA2R, F3, DUSP2, TFF2, TNXA, ITGB3, VASP, MT-CO1, ACE, ALOX12, ALOX15, CCL24, CYSLTR2, DPCR1, GP5, PF4, TFF3, F2, F2R, FGA, CYP2C9, GP6, ADH7, HNMT, PTGDR, SULT1A3, HLA-DPB1, ODC1, CEP68, F12, PTGDR2, SELE, CD40LG, KNG1, CRP, ALOX5AP, CD63, IGES, MYBPH, PTGIS, SAA4, BCHE, SERPINC1, ITGA2, ITGA2B, F2RL3, FCER1G, FCER1A, P2RX1, PAFAH1B2, PTGER1, TFF1, AHSP, ASIC3, CCL11, CES2, DEFA1, FCRL6, GGT2, GORASP1, GUSB, IL17D, LILRB4, OXA1L, PAFAH1B3, PEAR1, SOX7, THBD, TRIM26, UGT1A, VWF, WDR46, ZNRD1, C1S, HRH2, PTGER4, F10, G6PD, SCARB1, PLAT, SERPINE1, IL5, CTNNB1, IGHE, IL13, IL3, CASP1, TYMP, ADAM33, CEACAM7, CLDN2, CLDN3, CLDN5, CLDN7, CLEC4A, CSF1, JMJD6, KIFC1, LPA, NAB1, SERPINA7, SMAP2, ADRA2A, CCL26, CYLD, ENPP3, F5, OLR1, SERPINB5, ADRB2, AGTR1, BIRC5, HMOX1, ITGAM, NOS3, ADA, BID, PON1, ALOX15B, CAMP, CD151, CD58, CTSG, DPEP1, GSTP1, HSPA4, IL17RA, IL1RN, KIF3A, KLF6, LSP1, LTB4R, MLH1, MMRN1, MYLK3, OPRL1, PNOC, POSTN, PTGES2, REN, SGCB, SLC6A12, SNX3, TAPBP, TNFSF10, TNNT3, UGDH, VKORC1, ADORA1, ADORA3, ATP2A3, CCR3, CD59, CEBPB, CGB5, GAST, GRP, HADHA, HP, MCL1, NFKBIB, PPIG, SELL, VTN, NFKBIA, IL1B, IL4, NOS2, CCL2, ICAM1, IRS1, MMP2, PLA2G6, ABCA1, CD79A, CYP2C19, HMGCR, HNF4A, MPO, PLAU, PTGER3, RPS27A, TBXAS1, TIMP1, VCAM1, ANXA5, AP2B1, CCK, ELANE, FSIP1, HDAC3, IL2RB, ITGAL, PLAUR, PPARD, SERPINA1, ADAMTS13, ADORA2B, ADORA2A, AIFM1, ANXA4, CASP9, CCL22, CNTF, COG2, CYBB, DCBLD2, DDIT3, DIABLO, EDN1, ENPP2, F7, GFPT1, GTF2H4, HLA-DRB4, HPGD, IDO1, IL11, IL1R2, IL5RA, LAMP2, LOX, LTA4H, MPL, MTHFR, NLRP3, PCNA, PLEK, PNPLA8, PTGDS, PTGES, PTGIR, PTGFR, SAT1, SLC22A2, SLC26A5, SLPI, SSTR2, SULT1A1, TAP1, TAP2, TTF2, UGT2B7, JUN, MAPK14, TGFB1, TNF, CALCA, CCL5, CGA, CSF2, F13A1, F8, IL18, LDLR, MMP1, NGF, NPPB, POMC, TTR, ACP1, AKR1B1, ANPEP, BDKRB2, C6, CD9, CES1, CHKB, DDR1, FGB, GBA, GC, H2AFX, HLA-DPA1, HLA-DRB1, IL10, IL17A, LGALS3, NAT2, PAM, PDE4A, PLA2G7, STAT6, STK10, TGIF1, THPO, UBE3C, VIP, ADAMTSL1, APOB, BAX, DYT10, FAS, FN1, IGFBP3, IKBKB, KLK3, PLA2G2A, PPARA, VDR, IL6, APOE, CASP3, CDH1, IL1RAPL2, PPARG, A2M, ABCB11, ADAM17, CD40, CETP, CNR1, CP, CYP1A2, DTD1, FANCC, GGT1, HRH1, HSPA5, IFNG, IL15, IL8, IRS2, MAP4K4, NQO1, OBSCN, OXT, PEPD, PIK3C2A, PNPLA3, PPP2R4, PRKAA2, PTPN6, RPS6KA3, SLCO1B1, TNFRSF11B, TRAF6, ADIPOQ, APC, APOA1, ATM, CALM1, CAT, CFTR, CHUK, |

|                          |                                                                                                                                                                                                                                                                                                                                                                                                                                                                                                                                                                                                                                                                                                                                                                                                                                                                                                |
|--------------------------|------------------------------------------------------------------------------------------------------------------------------------------------------------------------------------------------------------------------------------------------------------------------------------------------------------------------------------------------------------------------------------------------------------------------------------------------------------------------------------------------------------------------------------------------------------------------------------------------------------------------------------------------------------------------------------------------------------------------------------------------------------------------------------------------------------------------------------------------------------------------------------------------|
|                          | EPO, HGF, HLA-DQB1, IL2RA, KITLG, NOS1, TGFA, TLR4, BCL2, ACHE, ADCY10, AGT, ALB, ANGPT1, CAV1, CDK2, CDK4, CYP1A1, CYP3A4, FGF1, GFAP, HBB, HLA-C, HLA-DQA1, IFNA2, IL1A, IL1R1, JAK1, MAPK1, NTRK1, SLC2A1, TKT, TYR, XDH, CCND1, MAPK8, MMP9, NFKB1, ABCB1, EGF, ERBB2, ADCY1, AR, BCL2L1, BMP6, CD36, CSF3, CXCR4, DNAH8, HSPG2, ITGB1, JAK2, LIPC, LPL, PARP1, PIK3CA, PIK3CG, PLA2G4A, PTK2B, RELA, STAT1, TCF4, TP53, EGFR, VEGFA, BRCA1, BRAF, CDKN1A, HLA-B, RAF1, RPS6KA2, SOD1, SRC, STAT3, APP, KCNMA1, INS, IGF1, AKT1, CASP8, TNFRSF10B, OMA1, DIF, PLG, THBS1, LDLCQ3, LPO, FTL, FTH1, SLC22A7, CYP2B6, BDNF, SCARB2, HIF1A, TRH, EIF2AK3, AKR1C1, RECK, SLC22A6, CYP2C8, SP1, PRKAB1, CEBPG, RAC1, TNFRSF10A, MAPK3, HSF1, CASP6, GSK3B, BBC3, AKR1C2, AKR1C3, UGT1A8, UGT1A7, UGT1A10, PRKCD, PMAIP1, SLC22A11, ILK, CASP7, DCD, SLC22A9, TF, LTF, EPX, REL, MFI2, FPR1, GALC |
| <b>Overlapping genes</b> | JUN, NOS3, AKR1B1, NOS2, SOD1, PTGER3, PTGER2, MMP2, VCAM1, CASP3, MAPK8, IFNG, TNF, MMP1, EDN1, SERPINE1, MAPK1, TGFB1, APP, XDH, ALOX5, CCL11, DYT10, PTGS2, CCR3, IL1B, IL8, BCL2, NFKB1, IKBKB, RELA, MCL1                                                                                                                                                                                                                                                                                                                                                                                                                                                                                                                                                                                                                                                                                 |

### Two overlapping modules of active compounds of salvianolate's and aspirin's network

| Modules                      | Genes                                       | GOTERM_BP_ALL                                           |          | KEGG_PATHWAY                                 |          |
|------------------------------|---------------------------------------------|---------------------------------------------------------|----------|----------------------------------------------|----------|
|                              |                                             | Term                                                    | P-value  | Term                                         | P-value  |
| <b>M<sub>(s3a10)</sub></b>   | spn, cd97, cd37, icoslg, tnfsf9, emr2, cd86 | GO:0002697~regulation of immune effector process        | 1.00E-02 | Cell adhesion molecules (CAMs)               | 3.90E-03 |
|                              |                                             | GO:0050776~regulation of immune response                | 2.30E-02 | Intestinal immune network for IgA production | 3.80E-02 |
|                              |                                             | GO:0002684~positive regulation of immune system process | 2.80E-02 |                                              |          |
|                              |                                             | GO:0002682~regulation of immune system process          | 3.90E-02 |                                              |          |
|                              |                                             | GO:0048583~regulation of response to stimulus           | 4.00E-02 |                                              |          |
| <b>M<sub>(s33a114)</sub></b> | fasn, dgat2, scd                            | GO:0008610~lipid biosynthetic process                   | 3.20E-04 | None                                         |          |
|                              |                                             | GO:0044255~cellular lipid metabolic process             | 9.10E-04 |                                              |          |
|                              |                                             | GO:0006629~lipid metabolic process                      | 2.00E-03 |                                              |          |
|                              |                                             | GO:0006633~fatty acid biosynthetic process              | 1.20E-02 |                                              |          |
|                              |                                             | GO:0046394~carboxylic acid biosynthetic process         | 2.00E-02 |                                              |          |
|                              |                                             | GO:0016053~organic acid biosynthetic process            | 2.00E-02 |                                              |          |
|                              |                                             | GO:0044249~cellular biosynthetic process                | 2.20E-02 |                                              |          |

|  |  |                                                  |          |  |  |
|--|--|--------------------------------------------------|----------|--|--|
|  |  | GO:0006631~fatty acid metabolic process          | 2.40E-02 |  |  |
|  |  | GO:0009058~biosynthetic process                  | 2.40E-02 |  |  |
|  |  | GO:0032787~monocarboxylic acid metabolic process | 3.40E-02 |  |  |

**Table 2**

**Modules of active compounds of salvianolate's network**

| Modules | Score | Nodes | Edges | Node IDs                                                                                                                                                                                                                                                                                                     |
|---------|-------|-------|-------|--------------------------------------------------------------------------------------------------------------------------------------------------------------------------------------------------------------------------------------------------------------------------------------------------------------|
| 1       | 15    | 15    | 105   | il10, mmp9, mmp12, tnfa, mmp1, gc, adam33, timp2, mmp2, timp3, serpina1, serpina3, mmp3, il8, lta                                                                                                                                                                                                            |
| 2       | 9.455 | 45    | 208   | nampt, il17ra, blk, ifna5, btk, ifna6, sirt1, blnk, ifna8, lat2, ifna14, irs2, mapk14, il2, dok1, jun, il13, spry1, ifng, spry2, stam2, zap70, shc1, kdr, frap1, vegfa, lat, bax, lcp2, sh2d2a, grb2, bcl2, akt1, pik3ca, prkaa1, ephb2, ros1, il17a, mmp7, lyn, syk, src, vav1, pln, mapk8                  |
| 3       | 7     | 7     | 21    | emr2, tnfsf9, cd86, icoslg, cd37, cd97, spn                                                                                                                                                                                                                                                                  |
| 4       | 6.444 | 19    | 58    | stat1, smad2, f9, rela, ccl2, osm, myc, timp1, pold3, cdkn2a, igf1, igf1r, csf1, ccl5, tp53, ccl3, csf3, ccl11, sod1                                                                                                                                                                                         |
| 5       | 6     | 6     | 15    | slc16a1, slc16a3, slc16a7, slc16a8, cma1, slc16a4                                                                                                                                                                                                                                                            |
| 6       | 5     | 5     | 10    | eng, mcam, itgam, ptpcr, cd34                                                                                                                                                                                                                                                                                |
| 7       | 5     | 5     | 10    | actb, il1rn, il1r2, pgk1, il1b                                                                                                                                                                                                                                                                               |
| 8       | 4     | 4     | 6     | cdc25c, ifi27, cdk2, cdkn1a                                                                                                                                                                                                                                                                                  |
| 9       | 4     | 4     | 6     | ptgfrn, esr2, gja1, ptger4                                                                                                                                                                                                                                                                                   |
| 10      | 4     | 4     | 6     | cd68, snai2, fap, actin                                                                                                                                                                                                                                                                                      |
| 11      | 4     | 4     | 6     | excr4, par1, itk, mirn200b                                                                                                                                                                                                                                                                                   |
| 12      | 4     | 4     | 6     | ikbkb, tcf4, lin28b, tcf7l2                                                                                                                                                                                                                                                                                  |
| 13      | 3.911 | 46    | 88    | zbtb16, clec10a, mcm8, zbtb32, cdk5, dynamin, crmp1, fyn, sp7, eif2ak3, ibsp, bcr, cd4, crtc2, crtc3, atf4, hdac4, hspa5, ccnh, ryr1, bcl2l11, atf6, apaf1, mlc1, cd2, ervk2, chek1, tnfsf13, f2rl1, egfr, bad, cdc7, cdk9, hspa4, hcc, hsf1, lck, uts2r, hsr, eef1a1, creb1, rgs2, pgr, cd8a, map2k1, runx2 |
| 14      | 3.714 | 8     | 13    | tlr4, zc3h12a, tank, angpt1, il1r1, usp10, irak1, irf6                                                                                                                                                                                                                                                       |
| 15      | 3.333 | 4     | 5     | tyrp1, trpc6, itpr1, trpm4                                                                                                                                                                                                                                                                                   |
| 16      | 3.333 | 4     | 5     | spic, nfkb1, spi1, spib                                                                                                                                                                                                                                                                                      |
| 17      | 3     | 3     | 3     | setd2, srpk1, eif4e                                                                                                                                                                                                                                                                                          |
| 18      | 3     | 3     | 3     | eif4g2, vcp, 3.6.1.8                                                                                                                                                                                                                                                                                         |
| 19      | 3     | 3     | 3     | smad3, mid1, cemp1                                                                                                                                                                                                                                                                                           |
| 20      | 3     | 3     | 3     | muc1, muc3a, mmp13                                                                                                                                                                                                                                                                                           |
| 21      | 3     | 3     | 3     | cdc2, mapk3, mcl1                                                                                                                                                                                                                                                                                            |
| 22      | 3     | 3     | 3     | ppig, nqo1, cyp2b6                                                                                                                                                                                                                                                                                           |
| 23      | 3     | 3     | 3     | excl10, cx3cl1, excl11                                                                                                                                                                                                                                                                                       |
| 24      | 3     | 3     | 3     | arhgef2, icam1, nppa                                                                                                                                                                                                                                                                                         |
| 25      | 3     | 3     | 3     | camk1, hdac5, mef2c                                                                                                                                                                                                                                                                                          |
| 26      | 3     | 3     | 3     | crebbp, ep300, hdac6                                                                                                                                                                                                                                                                                         |
| 27      | 3     | 3     | 3     | plod1, plod2, mmrn1                                                                                                                                                                                                                                                                                          |



|    |       |    |     |                                                                                                                                                                                                                                                                                                                                                                                                                                                                                                                                              |
|----|-------|----|-----|----------------------------------------------------------------------------------------------------------------------------------------------------------------------------------------------------------------------------------------------------------------------------------------------------------------------------------------------------------------------------------------------------------------------------------------------------------------------------------------------------------------------------------------------|
|    |       |    |     | csf3r, eef1b3, apoa1, apoa2                                                                                                                                                                                                                                                                                                                                                                                                                                                                                                                  |
| 5  | 9     | 9  | 36  | vhl, iqsec1, foxp1, lrn1, gnai2, fgd5, aldh1l1, bcl6, ctdspl                                                                                                                                                                                                                                                                                                                                                                                                                                                                                 |
| 6  | 8     | 8  | 28  | slc39a8, c3ar1, fcgr3b, rad21, retn, lrcc25, slc3a2, sco1                                                                                                                                                                                                                                                                                                                                                                                                                                                                                    |
| 7  | 7.92  | 26 | 99  | slc35a2, nqo1, ugt1a1, sod2, nfe2l2, selp, gabpa, ros1, hmox1, scarb1, slpr2, slpr3, pah, il1b, hsd11b1, ugt1a7, abca1, slpr1, mbtps1, ugt1a10, ugt1a3, ugt1a6, ugt1a9, ugt2b7, ugt2b15, ugt1a4                                                                                                                                                                                                                                                                                                                                              |
| 8  | 7     | 7  | 21  | flt1, phactr1, psrcl, cbs, lpl, cnnm2, cdkn2b                                                                                                                                                                                                                                                                                                                                                                                                                                                                                                |
| 9  | 7     | 7  | 21  | cgrf1, pa2g4, ppp2r1b, basp1, plec1, itgb4, lama5                                                                                                                                                                                                                                                                                                                                                                                                                                                                                            |
| 10 | 7     | 7  | 21  | emr2, tnfsf9, icoslg, cd37, cd97, spn, cd86                                                                                                                                                                                                                                                                                                                                                                                                                                                                                                  |
| 11 | 6.625 | 33 | 106 | c6orf136, ccl25, xcl2, ccl19, il2, foxm1, ccl21, csf1, il8ra, igf1, ifna5, ifna6, ifna8, il8, ifna14, ptgfr, fstl1, ifi16, nampt, sell, sele, igf1r, ccl5, spcs1, flna, chpf, mgat1, ndufa10, pafah1b3, ifna1, ccl11, glt8d1, ccl24                                                                                                                                                                                                                                                                                                          |
| 12 | 6     | 6  | 15  | plekhh2, fcgbp, ubd, dbnnd2, syt1, znf560                                                                                                                                                                                                                                                                                                                                                                                                                                                                                                    |
| 13 | 5.467 | 16 | 41  | tnni1, myh2, myl1, myh3, idh1, myh14, lcp1, mybph, mpeg1, mpo, itga9, pdlim5, limk1, rock1, 3.6.4.1, nkx2-1                                                                                                                                                                                                                                                                                                                                                                                                                                  |
| 14 | 5.333 | 10 | 24  | cish, ace2, nfkbil1, ggt1, agt, agtr2, mas1, sry, sox3, aga                                                                                                                                                                                                                                                                                                                                                                                                                                                                                  |
| 15 | 5.25  | 25 | 63  | gfap, cox8a, fgl2, f2rl1, f2rl2, f2rl3, snx2, snx4, snx6, snx8, anxa7, adrb2, tjp1, snx9, snx21, cdc42, rac1, snx15, rhoa, snx5, snx3, mtg1, chn2, arhgap1, tbk1                                                                                                                                                                                                                                                                                                                                                                             |
| 16 | 5     | 5  | 10  | clu, apol1, c9orf3, apod, apof                                                                                                                                                                                                                                                                                                                                                                                                                                                                                                               |
| 17 | 5     | 11 | 25  | lif, pias3, il6st, soat1, epo, egr2, il11, thpo, il17d, kitlg, cxcl9                                                                                                                                                                                                                                                                                                                                                                                                                                                                         |
| 18 | 5     | 5  | 10  | tac1, grb7, map3k15, klf7, nkx2-2                                                                                                                                                                                                                                                                                                                                                                                                                                                                                                            |
| 19 | 5     | 5  | 10  | tlr2, hpgd, s100a8, s100a1, cbr1                                                                                                                                                                                                                                                                                                                                                                                                                                                                                                             |
| 20 | 5     | 5  | 10  | ttf2, fbxo11, ppp1r10, wdr82, tox3                                                                                                                                                                                                                                                                                                                                                                                                                                                                                                           |
| 21 | 5     | 5  | 10  | cfh, rara, cd55, il33, efemp1                                                                                                                                                                                                                                                                                                                                                                                                                                                                                                                |
| 22 | 5     | 5  | 10  | pak2, dlg1, hes1, eif4g2, mfi2                                                                                                                                                                                                                                                                                                                                                                                                                                                                                                               |
| 23 | 5     | 5  | 10  | krt5, ets2, ebp, krt14, ets1                                                                                                                                                                                                                                                                                                                                                                                                                                                                                                                 |
| 24 | 5     | 5  | 10  | ctcf, pax3, tbx1, myh7b, obscn                                                                                                                                                                                                                                                                                                                                                                                                                                                                                                               |
| 25 | 5     | 5  | 10  | masp1, tfpi, c1r, c1s, masp2                                                                                                                                                                                                                                                                                                                                                                                                                                                                                                                 |
| 26 | 4.667 | 10 | 21  | setd2, srf, spl, klf6, apcs, ebf1, mrxs5, sp3, gata4, ugdh                                                                                                                                                                                                                                                                                                                                                                                                                                                                                   |
| 27 | 4.667 | 79 | 182 | flt4, parp1, orc1l, mcm7, cdc6, orc2l, mcm3, il1a, dtd1, oit3, fgfr2, e2f5, sox9, gsk3b, bub1, ctnnb1, ccnb2, nf-kappab, f9, cldn3, mybl2, pparg, cdc20, bcl2, hspg2, aph1b, map3k7, psen1, psenen, ppig, cdh2, ncstn, snai2, mapk3, psen2, zeb1, myc, gli2, p2ry1, heca, p2ry12, lrp1, gp6, bcl2l2, par1, par4, smad2, ahr, nod2, tnfsf15, mapk9, tnfrsf4, mcl1, stat6, ptpn11, msr1, ppp2r4, map2k4, srpk1, eif4e, kras, igfals, mrc1, msh2, zhx2, pms2, 2.7.7.48, rela, cdc2, frap1, decr1, casr, itk, fyn, rage, atm, wdte1, cd36, vegfc |
| 28 | 4.333 | 7  | 13  | cd79b, nol3, igkv2-23, pnoc, hars, rln2, s100a4                                                                                                                                                                                                                                                                                                                                                                                                                                                                                              |
| 29 | 4.16  | 26 | 52  | muc3a, muc5ac, il13, atf3, adrbk1, inpp1l, dio2, grb2, tbxa2r, fclrl6, osm, lair1, inpp5d, akt3, jak1, ptpn6, jag1, lilrb3, sirpa, cd200r1, mafa, cd72, nos3, stat3, nfkbil2, tgfb3                                                                                                                                                                                                                                                                                                                                                          |
| 30 | 4     | 4  | 6   | aoc3, lipe, sod3, aqp7                                                                                                                                                                                                                                                                                                                                                                                                                                                                                                                       |
| 31 | 4     | 4  | 6   | ccnb1, c9orf66, pmp22, opcm1                                                                                                                                                                                                                                                                                                                                                                                                                                                                                                                 |
| 32 | 4     | 4  | 6   | galr1, slc5a8, agtr1, zmynd10                                                                                                                                                                                                                                                                                                                                                                                                                                                                                                                |
| 33 | 4     | 4  | 6   | zfp36, khrrp, pabpc1, elavl1                                                                                                                                                                                                                                                                                                                                                                                                                                                                                                                 |
| 34 | 4     | 4  | 6   | cdk5, stxbp3, fcn2, cdk5r2                                                                                                                                                                                                                                                                                                                                                                                                                                                                                                                   |
| 35 | 4     | 4  | 6   | h2afy, ctsa, il5ra, rb1                                                                                                                                                                                                                                                                                                                                                                                                                                                                                                                      |

|    |       |    |    |                                                                                                                                |
|----|-------|----|----|--------------------------------------------------------------------------------------------------------------------------------|
| 36 | 4     | 4  | 6  | foxp3, lrba, ikzf2, il2ra                                                                                                      |
| 37 | 4     | 4  | 6  | ndufa9, ndufs4, ndufv2, adcy10                                                                                                 |
| 38 | 4     | 4  | 6  | ing3, ckap2, ptk6, rps6ka1                                                                                                     |
| 39 | 4     | 4  | 6  | padi2, padi3, padi4, aifm1                                                                                                     |
| 40 | 4     | 4  | 6  | mipep, yme1l1, oxa1l, mrs2                                                                                                     |
| 41 | 4     | 4  | 6  | wdr46, ddx21, nop2, ebna1bp2                                                                                                   |
| 42 | 4     | 4  | 6  | pdgfra, lrp8, igfbp5, ddit4                                                                                                    |
| 43 | 4     | 4  | 6  | chtf18, nhp2l1, app, znhit3                                                                                                    |
| 44 | 4     | 4  | 6  | wdr5, mll3, utx, piwil1                                                                                                        |
| 45 | 4     | 4  | 6  | foxg1, grik3, hand2, prkcb                                                                                                     |
| 46 | 4     | 4  | 6  | elovl2, fh12, klf14, glra1                                                                                                     |
| 47 | 3.875 | 17 | 31 | cxc4, sema3f, ascl2, mirn200b, apobec3c, skp2, apobec3d, col4a2, cd4, ctr9, spry1, agrp, trim26, mirn29a, trim32, mirn21, reck |
| 48 | 3.778 | 10 | 17 | vdr, cyp11a1, cyp17a1, trak1, nrip1, gcl, hsd17b6, gpc3, dusp10, runx2                                                         |
| 49 | 3.692 | 14 | 24 | ntrk1, ntsr1, snrpg, itgav, sqstm1, lamb1, tnfsf11, itgb1, slurp1, ngfr, ngf, ern1, calm1, nfatc2                              |
| 50 | 3.6   | 6  | 9  | traf6, angpt1, irak1, tank, usp10, zc3h12a                                                                                     |
| 51 | 3.375 | 17 | 27 | cdk2, lims1, ipp, rsu1, srebf2, hmger, ifi27, alox5, cdkn1b, cdc25c, bak1, pmaip1, fas, cox1, alox15b, alox12, ldlr            |
| 52 | 3.375 | 17 | 27 | mapk1, ripk3, aaas, bcatenin, hnf1a, dym, bcl9l, wwox, csnk1a1, dvl2, nedd9, bcar1, myo18b, hoxc6, kif3a, prkab1, agfg1        |
| 53 | 3.375 | 17 | 27 | hrh1, hsp90aa1, pkc, appl1, raf1, iqgap1, rab5a, ilk, tgfa, kcnj10, map2k1, erbb2, fgf2, egf, neurog2, ascl1, dag1             |
| 54 | 3.333 | 4  | 5  | pdf, aqp4, cd46, cd59                                                                                                          |
| 55 | 3.333 | 4  | 5  | adora2a, adora2b, nt5e, igkv2d-29                                                                                              |
| 56 | 3.333 | 4  | 5  | stk24, slk, stk10, plk1                                                                                                        |
| 57 | 3.333 | 7  | 10 | en1, cdh13, anapc11, ube2c, apc2, cdh1, hrh2                                                                                   |
| 58 | 3.143 | 15 | 22 | cd244, cysl1r1, cysl1r2, nfkb1, slc45a2, alox5ap, anxa1, ubxn1, ugt1a@, cyp3a4, uts2r, slc10a2, slc22a6, slc22a8, slc22a2      |
| 59 | 3.111 | 10 | 14 | braf, irs2, hras, tbc1d4, itih5, cx3cl1, ret, mtch2, fto, irs1                                                                 |
| 60 | 3     | 3  | 3  | cyp3a, cyp2a6, cyp2c8                                                                                                          |
| 61 | 3     | 3  | 3  | ccr10, cx3cr1, cd69                                                                                                            |
| 62 | 3     | 3  | 3  | mc2r, mc1r, mc5r                                                                                                               |
| 63 | 3     | 3  | 3  | fgf1, fgfr1, mmp26                                                                                                             |
| 64 | 3     | 3  | 3  | trpc6, sphk1, smpd2                                                                                                            |
| 65 | 3     | 3  | 3  | afg3l1, oma1, opa1                                                                                                             |
| 66 | 3     | 3  | 3  | serpinf2, s100a6, cxadr                                                                                                        |
| 67 | 3     | 3  | 3  | epha3, pafah1b2, kiaa0101                                                                                                      |
| 68 | 3     | 3  | 3  | fkbp5, klk3, tmprss2                                                                                                           |
| 69 | 3     | 3  | 3  | foxp2, kcnq1, hdac4                                                                                                            |
| 70 | 3     | 3  | 3  | tg, picalm, smap2                                                                                                              |
| 71 | 3     | 3  | 3  | chek1, cdc7, cdk9                                                                                                              |
| 72 | 3     | 3  | 3  | lig3, mirn22, mirn150                                                                                                          |
| 73 | 3     | 3  | 3  | hla-a29.1, anpep, hdc                                                                                                          |
| 74 | 3     | 3  | 3  | il1rn, il1r2, actb                                                                                                             |
| 75 | 3     | 3  | 3  | gja1, ptgfrn, esr2                                                                                                             |
| 76 | 3     | 3  | 3  | pecam1, cd300a, preb                                                                                                           |

|     |       |   |   |                                                |
|-----|-------|---|---|------------------------------------------------|
| 77  | 3     | 3 | 3 | xrcc1, hgf, dusp2                              |
| 78  | 3     | 3 | 3 | sim2, per1, arnt                               |
| 79  | 3     | 3 | 3 | dnajc3, dnajb6, hsp90b2p                       |
| 80  | 3     | 3 | 3 | ptx3, rhob, rhoc                               |
| 81  | 3     | 7 | 9 | tlr4, sarm1, foxo1, abhd5, nucb2, nlrp3, myd88 |
| 82  | 3     | 3 | 3 | pi3, tys, gpsn2                                |
| 83  | 3     | 3 | 3 | klk4, sds, klk2                                |
| 84  | 3     | 3 | 3 | mapkapk2, fanca, fancc                         |
| 85  | 3     | 3 | 3 | baz1b, dgcr14, rps6ka3                         |
| 86  | 3     | 3 | 3 | mirn130a, acvr1, bmp6                          |
| 87  | 3     | 3 | 3 | traf3, smpd1, pde4a                            |
| 88  | 3     | 3 | 3 | ikzf3, zpbp2, tmem39a                          |
| 89  | 3     | 3 | 3 | gorasp1, gorasp2, grasps                       |
| 90  | 3     | 3 | 3 | jmjd5, hif1an, jmjd6                           |
| 91  | 3     | 3 | 3 | afm, atrn, fbn1                                |
| 92  | 3     | 3 | 3 | gas5, snord15a, mll                            |
| 93  | 3     | 3 | 3 | adar, adarb1, adarb2                           |
| 94  | 3     | 3 | 3 | ldhb, fat, cdkn2d                              |
| 95  | 3     | 3 | 3 | cep68, triobp, trio                            |
| 96  | 3     | 3 | 3 | ctnnd1, pak6, anxa5                            |
| 97  | 3     | 3 | 3 | ndufc2, thada, mef2a                           |
| 98  | 3     | 3 | 3 | tcf7l2, ikkbb, lin28b                          |
| 99  | 3     | 3 | 3 | neurog1, aldh7a1, gria1                        |
| 100 | 3     | 3 | 3 | dgat2, fasn, scd                               |
| 101 | 3     | 3 | 3 | oxtr, rpe, oxt                                 |
| 102 | 3     | 3 | 3 | rheb, tsc2, mcra1                              |
| 103 | 3     | 3 | 3 | ptpn22, acp1, zap70                            |
| 104 | 3     | 3 | 3 | myt1l, zranb1, nploc4                          |
| 105 | 3     | 3 | 3 | spon1, pofut2, cfp                             |
| 106 | 3     | 3 | 3 | ranbp1, gsta1, gsta2                           |
| 107 | 3     | 3 | 3 | ndell, pafah1b1, adra1d                        |
| 108 | 3     | 3 | 3 | defa1, defa3, defb1                            |
| 109 | 3     | 3 | 3 | aldh1a1, rgs19, oprl1                          |
| 110 | 3     | 3 | 3 | fbxo25, fh, hax1                               |
| 111 | 3     | 3 | 3 | fgg, fga, fgb                                  |
| 112 | 3     | 3 | 3 | 3.4.13.3, nt5c1a, cndp2                        |
| 113 | 3     | 3 | 3 | dmrt1, slc39a14, c4bpa                         |
| 114 | 3     | 3 | 3 | mt1l, mbp, lamc2                               |
| 115 | 3     | 3 | 3 | cntf, ctnnb1, rnase3                           |
| 116 | 3     | 3 | 3 | bp8, adh7, rdh10                               |
| 117 | 3     | 3 | 3 | cfb, plp2, saa4                                |
| 118 | 3     | 3 | 3 | rps6kb1, prkaa2, arg2                          |
| 119 | 3     | 3 | 3 | pvr, kng1, igfbp6                              |
| 120 | 3     | 3 | 3 | 1.2.2.2, ppm2c, pdk4                           |
| 121 | 3     | 3 | 3 | casp6, nlrp1, casp1                            |
| 122 | 2.667 | 7 | 8 | serpina7, aavsl, ass1, apc, cd1a, cd207, lcs1  |

**Table 4**

**762 GO biological functions and 63 KEGG pathways in top 10 non-overlapping modules of active compounds of salvianolate's network**

| Modules           | Genes                                                                                             | GOTERM_BP_ALL                                                             |          | KEGG_PATHWAY                           |          |
|-------------------|---------------------------------------------------------------------------------------------------|---------------------------------------------------------------------------|----------|----------------------------------------|----------|
|                   |                                                                                                   | Term                                                                      | P-value  | Term                                   | P-value  |
| M <sub>(s1)</sub> | il10, mmp9, mmp12, tnfa, mmp1, gc, adam33, timp2, mmp2, timp3, serpina1, serpina3, mmp3, il8, lta | GO:0030574~collagen catabolic process                                     | 1.50E-05 | Bladder cancer                         | 7.60E-06 |
|                   |                                                                                                   | GO:0044243~multicellular organismal catabolic process                     | 3.60E-05 | Pathways in cancer                     | 4.00E-03 |
|                   |                                                                                                   | GO:0032963~collagen metabolic process                                     | 5.50E-05 | Cytokine-cytokine receptor interaction | 1.90E-02 |
|                   |                                                                                                   | GO:0044259~multicellular organismal macromolecule metabolic process       | 6.60E-05 |                                        |          |
|                   |                                                                                                   | GO:0044236~multicellular organismal metabolic process                     | 1.20E-04 |                                        |          |
|                   |                                                                                                   | GO:0051045~negative regulation of membrane protein ectodomain proteolysis | 2.10E-03 |                                        |          |
|                   |                                                                                                   | GO:0006508~proteolysis                                                    | 2.70E-03 |                                        |          |
|                   |                                                                                                   | GO:0042177~negative regulation of protein catabolic process               | 5.30E-03 |                                        |          |
|                   |                                                                                                   | GO:0045861~negative regulation of proteolysis                             | 6.30E-03 |                                        |          |
|                   |                                                                                                   | GO:0051043~regulation of membrane protein ectodomain proteolysis          | 7.40E-03 |                                        |          |
|                   |                                                                                                   | GO:0031330~negative regulation of cellular catabolic process              | 8.50E-03 |                                        |          |
|                   |                                                                                                   | GO:0032501~multicellular organismal process                               | 9.20E-03 |                                        |          |
|                   |                                                                                                   | GO:0009895~negative regulation of catabolic process                       | 1.40E-02 |                                        |          |
|                   |                                                                                                   | GO:0030162~regulation of proteolysis                                      | 1.90E-02 |                                        |          |
|                   |                                                                                                   | GO:0042176~regulation of protein catabolic process                        | 2.20E-02 |                                        |          |
|                   |                                                                                                   | GO:0031329~regulation of cellular catabolic process                       | 2.40E-02 |                                        |          |
|                   |                                                                                                   | GO:0009894~regulation of catabolic process                                | 3.70E-02 |                                        |          |
|                   |                                                                                                   | GO:0006955~immune response                                                | 3.70E-02 |                                        |          |
|                   |                                                                                                   | GO:0040017~positive regulation of locomotion                              | 3.80E-02 |                                        |          |
|                   |                                                                                                   | GO:0048731~system development                                             | 4.70E-02 |                                        |          |
| M <sub>(s2)</sub> | nampt, il17ra, blk, ifna5, btk,                                                                   | GO:0007243~protein kinase cascade                                         | 4.00E-11 | Fc epsilon RI signaling pathway        | 4.60E-12 |



|                                                                                                                                                                                                                                                             |                                                                             |          |                                                            |          |
|-------------------------------------------------------------------------------------------------------------------------------------------------------------------------------------------------------------------------------------------------------------|-----------------------------------------------------------------------------|----------|------------------------------------------------------------|----------|
| ifna6, sirt1, blnk, ifna8, lat2, ifna14, irs2, mapk14, il2, dok1, jun, il13, spry1, ifng, spry2, stam2, zap70, shc1, kdr, frap1, vegfa, lat, bax, lcp2, sh2d2a, grb2, bcl2, akt1, pik3ca, prkaa1, ephb2, ros1, il17a, mmp7, lyn, syk, src, vav1, pln, mapk8 | GO:0018193~peptidyl-amino acid modification                                 | 4.10E-11 | Natural killer cell mediated cytotoxicity                  | 9.40E-11 |
|                                                                                                                                                                                                                                                             | GO:0006468~protein amino acid phosphorylation                               | 4.20E-11 | Jak-STAT signaling pathway                                 | 5.70E-10 |
|                                                                                                                                                                                                                                                             | GO:0007167~enzyme linked receptor protein signaling pathway                 | 2.60E-10 | T cell receptor signaling pathway                          | 3.50E-09 |
|                                                                                                                                                                                                                                                             | GO:0048518~positive regulation of biological process                        | 2.80E-10 | B cell receptor signaling pathway                          | 5.30E-08 |
|                                                                                                                                                                                                                                                             | GO:0016310~phosphorylation                                                  | 6.10E-10 | Neurotrophin signaling pathway                             | 2.00E-07 |
|                                                                                                                                                                                                                                                             | GO:0007169~transmembrane receptor protein tyrosine kinase signaling pathway | 1.00E-09 | Toll-like receptor signaling pathway                       | 5.50E-07 |
|                                                                                                                                                                                                                                                             | GO:0045321~leukocyte activation                                             | 2.10E-09 | Focal adhesion                                             | 1.30E-06 |
|                                                                                                                                                                                                                                                             | GO:0048522~positive regulation of cellular process                          | 2.20E-09 | Regulation of autophagy                                    | 4.90E-06 |
|                                                                                                                                                                                                                                                             | GO:0008284~positive regulation of cell proliferation                        | 2.30E-09 | Cytokine-cytokine receptor interaction                     | 1.50E-05 |
|                                                                                                                                                                                                                                                             | GO:0050896~response to stimulus                                             | 4.50E-09 | VEGF signaling pathway                                     | 1.60E-05 |
|                                                                                                                                                                                                                                                             | GO:0018108~peptidyl-tyrosine phosphorylation                                | 4.80E-09 | Colorectal cancer                                          | 3.10E-05 |
|                                                                                                                                                                                                                                                             | GO:0042127~regulation of cell proliferation                                 | 4.80E-09 | ErbB signaling pathway                                     | 3.80E-05 |
|                                                                                                                                                                                                                                                             | GO:0018212~peptidyl-tyrosine modification                                   | 6.20E-09 | RIG-I-like receptor signaling pathway                      | 1.60E-04 |
|                                                                                                                                                                                                                                                             | GO:0007242~intracellular signaling cascade                                  | 7.60E-09 | Insulin signaling pathway                                  | 4.30E-04 |
|                                                                                                                                                                                                                                                             | GO:0006793~phosphorus metabolic process                                     | 1.00E-08 | Autoimmune thyroid disease                                 | 5.20E-04 |
|                                                                                                                                                                                                                                                             | GO:0006796~phosphate metabolic process                                      | 1.00E-08 | Fc gamma R-mediated phagocytosis                           | 6.30E-04 |
|                                                                                                                                                                                                                                                             | GO:0001775~cell activation                                                  | 1.10E-08 | Epithelial cell signaling in Helicobacter pylori infection | 1.50E-03 |
|                                                                                                                                                                                                                                                             | GO:0002376~immune system process                                            | 1.50E-08 | Renal cell carcinoma                                       | 1.70E-03 |
|                                                                                                                                                                                                                                                             | GO:0007166~cell surface receptor linked signal transduction                 | 1.60E-08 | GnRH signaling pathway                                     | 5.80E-03 |
|                                                                                                                                                                                                                                                             | GO:0043687~post-translational protein modification                          | 2.30E-08 | mTOR signaling pathway                                     | 6.60E-03 |
|                                                                                                                                                                                                                                                             | GO:0048513~organ development                                                | 3.30E-08 | Cytosolic DNA-sensing pathway                              | 7.70E-03 |
|                                                                                                                                                                                                                                                             | GO:0007165~signal transduction                                              | 4.70E-08 | Pathways in cancer                                         | 9.70E-03 |
|                                                                                                                                                                                                                                                             | GO:0050793~regulation of developmental process                              | 5.80E-08 | Glioma                                                     | 1.10E-02 |
|                                                                                                                                                                                                                                                             | GO:0051704~multi-organism process                                           | 6.50E-08 | Chemokine signaling pathway                                | 1.20E-02 |
|                                                                                                                                                                                                                                                             | GO:0006464~protein modification process                                     | 7.40E-08 | Adipocytokine signaling pathway                            | 1.30E-02 |

|  |  |                                                           |          |                                         |          |
|--|--|-----------------------------------------------------------|----------|-----------------------------------------|----------|
|  |  | GO:0048583~regulation of response to stimulus             | 9.80E-08 | Progesterone-mediated oocyte maturation | 1.60E-02 |
|  |  | GO:0042325~regulation of phosphorylation                  | 1.00E-07 | Apoptosis                               | 1.80E-02 |
|  |  | GO:0006950~response to stress                             | 1.20E-07 | Primary immunodeficiency                | 2.30E-02 |
|  |  | GO:0051094~positive regulation of developmental process   | 1.20E-07 | Prostate cancer                         | 2.60E-02 |
|  |  | GO:0019220~regulation of phosphate metabolic process      | 1.50E-07 | Type II diabetes mellitus               | 2.70E-02 |
|  |  | GO:0051174~regulation of phosphorus metabolic process     | 1.50E-07 |                                         |          |
|  |  | GO:0043412~biopolymer modification                        | 1.60E-07 |                                         |          |
|  |  | GO:0032879~regulation of localization                     | 1.70E-07 |                                         |          |
|  |  | GO:0002682~regulation of immune system process            | 1.70E-07 |                                         |          |
|  |  | GO:0045597~positive regulation of cell differentiation    | 3.80E-07 |                                         |          |
|  |  | GO:0030154~cell differentiation                           | 4.60E-07 |                                         |          |
|  |  | GO:0030097~hemopoiesis                                    | 4.70E-07 |                                         |          |
|  |  | GO:0051049~regulation of transport                        | 5.40E-07 |                                         |          |
|  |  | GO:0006955~immune response                                | 6.40E-07 |                                         |          |
|  |  | GO:0048869~cellular developmental process                 | 8.50E-07 |                                         |          |
|  |  | GO:0048731~system development                             | 8.70E-07 |                                         |          |
|  |  | GO:0048534~hemopoietic or lymphoid organ development      | 9.90E-07 |                                         |          |
|  |  | GO:0032844~regulation of homeostatic process              | 1.20E-06 |                                         |          |
|  |  | GO:0009966~regulation of signal transduction              | 1.20E-06 |                                         |          |
|  |  | GO:0010646~regulation of cell communication               | 1.30E-06 |                                         |          |
|  |  | GO:0045576~mast cell activation                           | 1.50E-06 |                                         |          |
|  |  | GO:0002520~immune system development                      | 1.50E-06 |                                         |          |
|  |  | GO:0045595~regulation of cell differentiation             | 1.60E-06 |                                         |          |
|  |  | GO:0046649~lymphocyte activation                          | 2.10E-06 |                                         |          |
|  |  | GO:0051239~regulation of multicellular organismal process | 2.50E-06 |                                         |          |
|  |  | GO:0042981~regulation of apoptosis                        | 3.20E-06 |                                         |          |
|  |  | GO:0048856~anatomical structure development               | 3.40E-06 |                                         |          |

|  |                                                                  |          |  |  |
|--|------------------------------------------------------------------|----------|--|--|
|  | GO:0043067~regulation of programmed cell death                   | 3.50E-06 |  |  |
|  | GO:0010941~regulation of cell death                              | 3.70E-06 |  |  |
|  | GO:0051716~cellular response to stimulus                         | 3.90E-06 |  |  |
|  | GO:0050789~regulation of biological process                      | 5.30E-06 |  |  |
|  | GO:0002684~positive regulation of immune system process          | 6.80E-06 |  |  |
|  | GO:0050794~regulation of cellular process                        | 7.80E-06 |  |  |
|  | GO:0006952~defense response                                      | 1.20E-05 |  |  |
|  | GO:0043269~regulation of ion transport                           | 1.20E-05 |  |  |
|  | GO:0048872~homeostasis of number of cells                        | 1.30E-05 |  |  |
|  | GO:0009893~positive regulation of metabolic process              | 1.30E-05 |  |  |
|  | GO:0001932~regulation of protein amino acid phosphorylation      | 1.30E-05 |  |  |
|  | GO:0030098~lymphocyte differentiation                            | 1.40E-05 |  |  |
|  | GO:0042221~response to chemical stimulus                         | 1.50E-05 |  |  |
|  | GO:0007265~Ras protein signal transduction                       | 1.60E-05 |  |  |
|  | GO:0009615~response to virus                                     | 1.90E-05 |  |  |
|  | GO:0050671~positive regulation of lymphocyte proliferation       | 2.30E-05 |  |  |
|  | GO:0065007~biological regulation                                 | 2.40E-05 |  |  |
|  | GO:0070665~positive regulation of leukocyte proliferation        | 2.40E-05 |  |  |
|  | GO:0032946~positive regulation of mononuclear cell proliferation | 2.40E-05 |  |  |
|  | GO:0051707~response to other organism                            | 2.50E-05 |  |  |
|  | GO:0007275~multicellular organismal development                  | 2.60E-05 |  |  |
|  | GO:0032502~developmental process                                 | 3.20E-05 |  |  |
|  | GO:0050790~regulation of catalytic activity                      | 3.30E-05 |  |  |
|  | GO:0009891~positive regulation of biosynthetic process           | 3.40E-05 |  |  |
|  | GO:0022602~ovulation cycle process                               | 3.70E-05 |  |  |
|  | GO:0010604~positive regulation                                   | 3.70E-05 |  |  |

|  |  |                                                                 |          |  |  |
|--|--|-----------------------------------------------------------------|----------|--|--|
|  |  | of macromolecule metabolic process                              |          |  |  |
|  |  | GO:0042110~T cell activation                                    | 3.80E-05 |  |  |
|  |  | GO:0043065~positive regulation of apoptosis                     | 3.90E-05 |  |  |
|  |  | GO:0048511~rhythmic process                                     | 4.10E-05 |  |  |
|  |  | GO:0043068~positive regulation of programmed cell death         | 4.10E-05 |  |  |
|  |  | GO:0008585~femaleGOnad development                              | 4.20E-05 |  |  |
|  |  | GO:0010942~positive regulation of cell death                    | 4.30E-05 |  |  |
|  |  | GO:0002521~leukocyte differentiation                            | 4.60E-05 |  |  |
|  |  | GO:0031325~positive regulation of cellular metabolic process    | 4.70E-05 |  |  |
|  |  | GO:0042698~ovulation cycle                                      | 5.00E-05 |  |  |
|  |  | GO:0001101~response to acid                                     | 5.10E-05 |  |  |
|  |  | GO:0051050~positive regulation of transport                     | 5.40E-05 |  |  |
|  |  | GO:0046660~female sex differentiation                           | 5.60E-05 |  |  |
|  |  | GO:0046545~development of primary female sexual characteristics | 5.60E-05 |  |  |
|  |  | GO:0050776~regulation of immune response                        | 5.90E-05 |  |  |
|  |  | GO:0032880~regulation of protein localization                   | 5.90E-05 |  |  |
|  |  | GO:0042592~homeostatic process                                  | 6.60E-05 |  |  |
|  |  | GO:0009605~response to external stimulus                        | 6.70E-05 |  |  |
|  |  | GO:0048584~positive regulation of response to stimulus          | 7.40E-05 |  |  |
|  |  | GO:0006928~cell motion                                          | 8.00E-05 |  |  |
|  |  | GO:0051249~regulation of lymphocyte activation                  | 8.30E-05 |  |  |
|  |  | GO:0044267~cellular protein metabolic process                   | 8.30E-05 |  |  |
|  |  | GO:0002279~mast cell activation during immune response          | 9.00E-05 |  |  |
|  |  | GO:0002448~mast cell mediated immunity                          | 9.00E-05 |  |  |
|  |  | GO:0043303~mast cell degranulation                              | 9.00E-05 |  |  |
|  |  | GO:0001568~blood vessel development                             | 9.20E-05 |  |  |
|  |  | GO:0043434~response to peptide                                  | 1.00E-04 |  |  |

|  |  |                                                                      |          |  |  |
|--|--|----------------------------------------------------------------------|----------|--|--|
|  |  | hormone stimulus                                                     |          |  |  |
|  |  | GO:0001944~vasculature development                                   | 1.00E-04 |  |  |
|  |  | GO:0010959~regulation of metal ion transport                         | 1.00E-04 |  |  |
|  |  | GO:0007154~cell communication                                        | 1.10E-04 |  |  |
|  |  | GO:0008637~apoptotic mitochondrial changes                           | 1.10E-04 |  |  |
|  |  | GO:0065009~regulation of molecular function                          | 1.10E-04 |  |  |
|  |  | GO:0050670~regulation of lymphocyte proliferation                    | 1.20E-04 |  |  |
|  |  | GO:0070663~regulation of leukocyte proliferation                     | 1.20E-04 |  |  |
|  |  | GO:0032944~regulation of mononuclear cell proliferation              | 1.20E-04 |  |  |
|  |  | GO:0010557~positive regulation of macromolecule biosynthetic process | 1.30E-04 |  |  |
|  |  | GO:0050851~antigen receptor-mediated signaling pathway               | 1.30E-04 |  |  |
|  |  | GO:0050871~positive regulation of B cell activation                  | 1.30E-04 |  |  |
|  |  | GO:0002694~regulation of leukocyte activation                        | 1.40E-04 |  |  |
|  |  | GO:0009607~response to biotic stimulus                               | 1.40E-04 |  |  |
|  |  | GO:0001934~positive regulation of protein amino acid phosphorylation | 1.50E-04 |  |  |
|  |  | GO:0001776~leukocyte homeostasis                                     | 1.80E-04 |  |  |
|  |  | GO:0031328~positive regulation of cellular biosynthetic process      | 1.80E-04 |  |  |
|  |  | GO:0050865~regulation of cell activation                             | 1.80E-04 |  |  |
|  |  | GO:0051649~establishment of localization in cell                     | 1.90E-04 |  |  |
|  |  | GO:0008286~insulin receptor signaling pathway                        | 1.90E-04 |  |  |
|  |  | GO:0051251~positive regulation of lymphocyte activation              | 2.10E-04 |  |  |
|  |  | GO:0042327~positive regulation of phosphorylation                    | 2.10E-04 |  |  |
|  |  | GO:0051272~positive regulation of cell motion                        | 2.20E-04 |  |  |
|  |  | GO:0002429~immune                                                    | 2.20E-04 |  |  |

|  |  |                                                                               |          |  |  |
|--|--|-------------------------------------------------------------------------------|----------|--|--|
|  |  | response-activating cell surface receptor signaling pathway                   |          |  |  |
|  |  | GO:0042102~positive regulation of T cell proliferation                        | 2.20E-04 |  |  |
|  |  | GO:0010562~positive regulation of phosphorus metabolic process                | 2.40E-04 |  |  |
|  |  | GO:0045937~positive regulation of phosphate metabolic process                 | 2.40E-04 |  |  |
|  |  | GO:0032868~response to insulin stimulus                                       | 2.40E-04 |  |  |
|  |  | GO:0009967~positive regulation of signal transduction                         | 2.50E-04 |  |  |
|  |  | GO:0031399~regulation of protein modification process                         | 2.50E-04 |  |  |
|  |  | GO:0019538~protein metabolic process                                          | 2.60E-04 |  |  |
|  |  | GO:0001541~ovarian follicle development                                       | 2.60E-04 |  |  |
|  |  | GO:0010033~response to organic substance                                      | 2.70E-04 |  |  |
|  |  | GO:0033554~cellular response to stress                                        | 2.70E-04 |  |  |
|  |  | GO:0002768~immune response-regulating cell surface receptor signaling pathway | 2.80E-04 |  |  |
|  |  | GO:0051270~regulation of cell motion                                          | 2.90E-04 |  |  |
|  |  | GO:0002696~positive regulation of leukocyte activation                        | 3.00E-04 |  |  |
|  |  | GO:0050853~B cell receptor signaling pathway                                  | 3.20E-04 |  |  |
|  |  | GO:0050867~positive regulation of cell activation                             | 3.50E-04 |  |  |
|  |  | GO:0045834~positive regulation of lipid metabolic process                     | 3.60E-04 |  |  |
|  |  | GO:0002274~myeloid leukocyte activation                                       | 3.60E-04 |  |  |
|  |  | GO:0008406~gonad development                                                  | 3.70E-04 |  |  |
|  |  | GO:0051641~cellular localization                                              | 3.80E-04 |  |  |
|  |  | GO:0006916~anti-apoptosis                                                     | 3.90E-04 |  |  |
|  |  | GO:0050731~positive regulation of peptidyl-tyrosine phosphorylation           | 3.90E-04 |  |  |
|  |  | GO:0007267~cell-cell signaling                                                | 3.90E-04 |  |  |
|  |  | GO:0006915~apoptosis                                                          | 4.00E-04 |  |  |
|  |  | GO:0050863~regulation of T cell activation                                    | 4.30E-04 |  |  |
|  |  | GO:0048514~blood vessel                                                       | 4.30E-04 |  |  |

|  |  |                                                                      |          |  |  |
|--|--|----------------------------------------------------------------------|----------|--|--|
|  |  | morphogenesis                                                        |          |  |  |
|  |  | GO:0012501~programmed cell death                                     | 4.50E-04 |  |  |
|  |  | GO:0010647~positive regulation of cell communication                 | 4.50E-04 |  |  |
|  |  | GO:0070201~regulation of establishment of protein localization       | 4.90E-04 |  |  |
|  |  | GO:0050864~regulation of B cell activation                           | 5.00E-04 |  |  |
|  |  | GO:0032268~regulation of cellular protein metabolic process          | 5.20E-04 |  |  |
|  |  | GO:0002757~immune response-activating signal transduction            | 5.20E-04 |  |  |
|  |  | GO:0048608~reproductive structure development                        | 5.70E-04 |  |  |
|  |  | GO:0045859~regulation of protein kinase activity                     | 5.80E-04 |  |  |
|  |  | GO:0043299~leukocyte degranulation                                   | 5.90E-04 |  |  |
|  |  | GO:0045137~development of primary sexual characteristics             | 5.90E-04 |  |  |
|  |  | GO:0002764~immune response-regulating signal transduction            | 6.50E-04 |  |  |
|  |  | GO:0051054~positive regulation of DNA metabolic process              | 6.50E-04 |  |  |
|  |  | GO:0043066~negative regulation of apoptosis                          | 6.60E-04 |  |  |
|  |  | GO:0032270~positive regulation of cellular protein metabolic process | 6.80E-04 |  |  |
|  |  | GO:0043549~regulation of kinase activity                             | 6.90E-04 |  |  |
|  |  | GO:0043069~negative regulation of programmed cell death              | 7.10E-04 |  |  |
|  |  | GO:0060548~negative regulation of cell death                         | 7.20E-04 |  |  |
|  |  | GO:0009411~response to UV                                            | 7.60E-04 |  |  |
|  |  | GO:0009725~response to hormone stimulus                              | 8.00E-04 |  |  |
|  |  | GO:0033135~regulation of peptidyl-serine phosphorylation             | 8.10E-04 |  |  |
|  |  | GO:0046632~alpha-beta T cell differentiation                         | 8.10E-04 |  |  |
|  |  | GO:0051247~positive regulation of protein metabolic process          | 8.20E-04 |  |  |

|  |                                                                  |          |  |  |
|--|------------------------------------------------------------------|----------|--|--|
|  | GO:0048878~chemical homeostasis 8                                | 8.20E-04 |  |  |
|  | GO:0051338~regulation of transferase activity                    | 8.60E-04 |  |  |
|  | GO:0043405~regulation of MAP kinase activity                     | 8.70E-04 |  |  |
|  | GO:0042129~regulation of T cell proliferation                    | 8.80E-04 |  |  |
|  | GO:0043085~positive regulation of catalytic activity             | 9.00E-04 |  |  |
|  | GO:0001894~tissue homeostasis                                    | 9.20E-04 |  |  |
|  | GO:0002444~myeloid leukocyte mediated immunity                   | 9.30E-04 |  |  |
|  | GO:0030217~T cell differentiation                                | 1.00E-03 |  |  |
|  | GO:0048754~branching morphogenesis of a tube                     | 1.00E-03 |  |  |
|  | GO:0001525~angiogenesis                                          | 1.00E-03 |  |  |
|  | GO:0007548~sex differentiation                                   | 1.10E-03 |  |  |
|  | GO:0003006~reproductive developmental process                    | 1.10E-03 |  |  |
|  | GO:0050730~regulation of peptidyl-tyrosine phosphorylation       | 1.10E-03 |  |  |
|  | GO:0032869~cellular response to insulin stimulus                 | 1.10E-03 |  |  |
|  | GO:0006006~glucose metabolic process                             | 1.20E-03 |  |  |
|  | GO:0051246~regulation of protein metabolic process               | 1.20E-03 |  |  |
|  | GO:0002053~positive regulation of mesenchymal cell proliferation | 1.20E-03 |  |  |
|  | GO:0051924~regulation of calcium ion transport                   | 1.20E-03 |  |  |
|  | GO:0032501~multicellular organismal process                      | 1.30E-03 |  |  |
|  | GO:0008219~cell death                                            | 1.30E-03 |  |  |
|  | GO:0009719~response to endogenous stimulus                       | 1.30E-03 |  |  |
|  | GO:0046631~alpha-beta T cell activation                          | 1.30E-03 |  |  |
|  | GO:0045055~regulated secretory pathway                           | 1.30E-03 |  |  |
|  | GO:0010464~regulation of mesenchymal cell proliferation          | 1.30E-03 |  |  |
|  | GO:0002275~myeloid cell activation during immune response        | 1.30E-03 |  |  |
|  | GO:0016265~death                                                 | 1.40E-03 |  |  |
|  | GO:0001763~morphogenesis of a branching structure                | 1.50E-03 |  |  |



|  |                                                                            |          |  |  |
|--|----------------------------------------------------------------------------|----------|--|--|
|  | GO:0045058~T cell selection                                                | 1.50E-03 |  |  |
|  | GO:0042113~B cell activation                                               | 1.60E-03 |  |  |
|  | GO:0050870~positive regulation of T cell activation                        | 1.60E-03 |  |  |
|  | GO:0044419~interspecies interaction between organisms                      | 1.60E-03 |  |  |
|  | GO:0010676~positive regulation of cellular carbohydrate metabolic process  | 1.70E-03 |  |  |
|  | GO:0045913~positive regulation of carbohydrate metabolic process           | 1.70E-03 |  |  |
|  | GO:0048678~response to axon injury                                         | 1.70E-03 |  |  |
|  | GO:0030334~regulation of cell migration                                    | 1.70E-03 |  |  |
|  | GO:0044093~positive regulation of molecular function                       | 1.80E-03 |  |  |
|  | GO:0043029~T cell homeostasis                                              | 1.80E-03 |  |  |
|  | GO:0046889~positive regulation of lipid biosynthetic process               | 1.80E-03 |  |  |
|  | GO:0001836~release of cytochrome c from mitochondria                       | 1.80E-03 |  |  |
|  | GO:0008283~cell proliferation                                              | 1.90E-03 |  |  |
|  | GO:0008633~activation of pro-apoptotic gene products                       | 2.00E-03 |  |  |
|  | GO:0048519~negative regulation of biological process                       | 2.20E-03 |  |  |
|  | GO:0048871~multicellular organismal homeostasis                            | 2.20E-03 |  |  |
|  | GO:0042531~positive regulation of tyrosine phosphorylation of STAT protein | 2.20E-03 |  |  |
|  | GO:0007264~small GTPase mediated signal transduction                       | 2.20E-03 |  |  |
|  | GO:0000165~MAPKKK cascade                                                  | 2.30E-03 |  |  |
|  | GO:0031401~positive regulation of protein modification process             | 2.50E-03 |  |  |
|  | GO:0030335~positive regulation of cell migration                           | 2.50E-03 |  |  |
|  | GO:0055074~calcium ion homeostasis                                         | 2.50E-03 |  |  |
|  | GO:0019318~hexose metabolic process                                        | 2.70E-03 |  |  |
|  | GO:0040012~regulation of locomotion                                        | 2.70E-03 |  |  |
|  | GO:0002637~regulation of immunoglobulin production                         | 2.80E-03 |  |  |
|  | GO:0046427~positive regulation                                             | 2.80E-03 |  |  |

|  |                                                                       |          |  |  |
|--|-----------------------------------------------------------------------|----------|--|--|
|  | of JAK-STAT cascade                                                   |          |  |  |
|  | GO:0002253~activation of immune response                              | 2.90E-03 |  |  |
|  | GO:0048468~cell development                                           | 3.10E-03 |  |  |
|  | GO:0051173~positive regulation of nitrogen compound metabolic process | 3.10E-03 |  |  |
|  | GO:0007173~epidermal growth factor receptor signaling pathway         | 3.30E-03 |  |  |
|  | GO:0046320~regulation of fatty acid oxidation                         | 3.30E-03 |  |  |
|  | GO:0002260~lymphocyte homeostasis                                     | 3.30E-03 |  |  |
|  | GO:0040017~positive regulation of locomotion                          | 3.30E-03 |  |  |
|  | GO:0055065~metal ion homeostasis                                      | 3.40E-03 |  |  |
|  | GO:0018105~peptidyl-serine phosphorylation                            | 3.50E-03 |  |  |
|  | GO:0010522~regulation of calcium ion transport into cytosol           | 3.50E-03 |  |  |
|  | GO:0032940~secretion by cell                                          | 3.50E-03 |  |  |
|  | GO:0002697~regulation of immune effector process                      | 3.60E-03 |  |  |
|  | GO:0021700~developmental maturation                                   | 3.60E-03 |  |  |
|  | GO:0040008~regulation of growth                                       | 3.60E-03 |  |  |
|  | GO:0009888~tissue development                                         | 3.70E-03 |  |  |
|  | GO:0065008~regulation of biological quality                           | 3.70E-03 |  |  |
|  | GO:0080135~regulation of cellular response to stress                  | 3.80E-03 |  |  |
|  | GO:0042509~regulation of tyrosine phosphorylation of STAT protein     | 4.00E-03 |  |  |
|  | GO:0060249~anatomical structure homeostasis                           | 4.10E-03 |  |  |
|  | GO:0001933~negative regulation of protein amino acid phosphorylation  | 4.20E-03 |  |  |
|  | GO:0045582~positive regulation of T cell differentiation              | 4.20E-03 |  |  |
|  | GO:0022603~regulation of anatomical structure morphogenesis           | 4.30E-03 |  |  |
|  | GO:0009991~response to extracellular stimulus                         | 4.40E-03 |  |  |
|  | GO:0035295~tube development                                           | 4.40E-03 |  |  |

|  |                                                                  |          |  |  |
|--|------------------------------------------------------------------|----------|--|--|
|  | GO:0051047~positive regulation of secretion                      | 4.40E-03 |  |  |
|  | GO:0007568~aging                                                 | 4.50E-03 |  |  |
|  | GO:0005996~monosaccharide metabolic process                      | 4.50E-03 |  |  |
|  | GO:0045860~positive regulation of protein kinase activity        | 4.60E-03 |  |  |
|  | GO:0008624~induction of apoptosis by extracellular signals       | 4.80E-03 |  |  |
|  | GO:0019216~regulation of lipid metabolic process                 | 4.80E-03 |  |  |
|  | GO:0000060~protein import into nucleus, translocation            | 4.80E-03 |  |  |
|  | GO:0009628~response to abiotic stimulus                          | 5.00E-03 |  |  |
|  | GO:0051052~regulation of DNA metabolic process                   | 5.00E-03 |  |  |
|  | GO:0051223~regulation of protein transport                       | 5.00E-03 |  |  |
|  | GO:0045621~positive regulation of lymphocyte differentiation     | 5.10E-03 |  |  |
|  | GO:0007423~sensory organ development                             | 5.10E-03 |  |  |
|  | GO:0009611~response to wounding                                  | 5.10E-03 |  |  |
|  | GO:0033674~positive regulation of kinase activity                | 5.20E-03 |  |  |
|  | GO:0046425~regulation of JAK-STAT cascade                        | 5.30E-03 |  |  |
|  | GO:0002263~cell activation during immune response                | 5.30E-03 |  |  |
|  | GO:0002366~leukocyte activation during immune response           | 5.30E-03 |  |  |
|  | GO:0031331~positive regulation of cellular catabolic process     | 5.30E-03 |  |  |
|  | GO:0019722~calcium-mediated signaling                            | 5.60E-03 |  |  |
|  | GO:0055066~di-, tri-valent inorganic cation homeostasis          | 5.90E-03 |  |  |
|  | GO:0045767~regulation of anti-apoptosis                          | 5.90E-03 |  |  |
|  | GO:0010675~regulation of cellular carbohydrate metabolic process | 5.90E-03 |  |  |
|  | GO:0051347~positive regulation of transferase activity           | 6.00E-03 |  |  |
|  | GO:0043366~beta selection                                        | 6.10E-03 |  |  |
|  | GO:0044262~cellular carbohydrate metabolic process               | 6.20E-03 |  |  |

|  |  |                                                                              |          |  |  |
|--|--|------------------------------------------------------------------------------|----------|--|--|
|  |  | GO:0018209~peptidyl-serine modification                                      | 6.30E-03 |  |  |
|  |  | GO:0006109~regulation of carbohydrate metabolic process                      | 6.30E-03 |  |  |
|  |  | GO:0060341~regulation of cellular localization                               | 6.70E-03 |  |  |
|  |  | GO:0035239~tube morphogenesis                                                | 6.80E-03 |  |  |
|  |  | GO:0010627~regulation of protein kinase cascade                              | 6.80E-03 |  |  |
|  |  | GO:0050714~positive regulation of protein secretion                          | 6.90E-03 |  |  |
|  |  | GO:0002700~regulation of production of molecular mediator of immune response | 6.90E-03 |  |  |
|  |  | GO:0043270~positive regulation of ion transport                              | 7.20E-03 |  |  |
|  |  | GO:0032870~cellular response to hormone stimulus                             | 7.70E-03 |  |  |
|  |  | GO:0050801~ion homeostasis                                                   | 7.80E-03 |  |  |
|  |  | GO:0002252~immune effector process                                           | 7.80E-03 |  |  |
|  |  | GO:0048593~camera-type eye morphogenesis                                     | 7.90E-03 |  |  |
|  |  | GO:0046890~regulation of lipid biosynthetic process                          | 8.30E-03 |  |  |
|  |  | GO:0042326~negative regulation of phosphorylation                            | 8.30E-03 |  |  |
|  |  | GO:0009416~response to light stimulus                                        | 8.50E-03 |  |  |
|  |  | GO:0007005~mitochondrion organization                                        | 8.50E-03 |  |  |
|  |  | GO:0048660~regulation of smooth muscle cell proliferation                    | 8.60E-03 |  |  |
|  |  | GO:0045165~cell fate commitment                                              | 8.60E-03 |  |  |
|  |  | GO:0009653~anatomical structure morphogenesis                                | 8.90E-03 |  |  |
|  |  | GO:0007417~central nervous system development                                | 9.10E-03 |  |  |
|  |  | GO:0006808~regulation of nitrogen utilization                                | 9.10E-03 |  |  |
|  |  | GO:0048523~negative regulation of cellular process                           | 9.30E-03 |  |  |
|  |  | GO:0010563~negative regulation of phosphorus metabolic process               | 9.40E-03 |  |  |
|  |  | GO:0030183~B cell differentiation                                            | 9.40E-03 |  |  |
|  |  | GO:0045936~negative regulation of phosphate metabolic process                | 9.40E-03 |  |  |
|  |  | GO:0080134~regulation of                                                     | 9.50E-03 |  |  |

|  |  |                                                                                                         |          |  |  |
|--|--|---------------------------------------------------------------------------------------------------------|----------|--|--|
|  |  | response to stress                                                                                      |          |  |  |
|  |  | GO:0040011~locomotion                                                                                   | 9.60E-03 |  |  |
|  |  | GO:0016477~cell migration                                                                               | 9.70E-03 |  |  |
|  |  | GO:0050778~positive regulation of immune response                                                       | 9.70E-03 |  |  |
|  |  | GO:0019217~regulation of fatty acid metabolic process                                                   | 9.70E-03 |  |  |
|  |  | GO:0009896~positive regulation of catabolic process                                                     | 9.70E-03 |  |  |
|  |  | GO:0045580~regulation of T cell differentiation                                                         | 1.10E-02 |  |  |
|  |  | GO:0055080~cation homeostasis                                                                           | 1.10E-02 |  |  |
|  |  | GO:0045935~positive regulation of nucleobase, nucleoside, nucleotide and nucleic acid metabolic process | 1.10E-02 |  |  |
|  |  | GO:0010746~regulation of plasma membrane long-chain fatty acid transport                                | 1.20E-02 |  |  |
|  |  | GO:0010748~negative regulation of plasma membrane long-chain fatty acid transport                       | 1.20E-02 |  |  |
|  |  | GO:0043497~regulation of protein heterodimerization activity                                            | 1.20E-02 |  |  |
|  |  | GO:0031558~induction of apoptosis in response to chemical stimulus                                      | 1.20E-02 |  |  |
|  |  | GO:0009408~response to heat                                                                             | 1.30E-02 |  |  |
|  |  | GO:0046903~secretion                                                                                    | 1.30E-02 |  |  |
|  |  | GO:0010565~regulation of cellular ketone metabolic process                                              | 1.30E-02 |  |  |
|  |  | GO:0050708~regulation of protein secretion                                                              | 1.30E-02 |  |  |
|  |  | GO:0007610~behavior                                                                                     | 1.30E-02 |  |  |
|  |  | GO:0051241~negative regulation of multicellular organismal process                                      | 1.40E-02 |  |  |
|  |  | GO:0051674~localization of cell                                                                         | 1.40E-02 |  |  |
|  |  | GO:0048870~cell motility                                                                                | 1.40E-02 |  |  |
|  |  | GO:0045893~positive regulation of transcription, DNA-dependent                                          | 1.40E-02 |  |  |
|  |  | GO:0040014~regulation of multicellular organism growth                                                  | 1.50E-02 |  |  |
|  |  | GO:0002703~regulation of leukocyte mediated immunity                                                    | 1.50E-02 |  |  |
|  |  | GO:0031329~regulation of cellular catabolic process                                                     | 1.50E-02 |  |  |
|  |  | GO:0009636~response to toxin                                                                            | 1.50E-02 |  |  |
|  |  | GO:0051254~positive regulation                                                                          | 1.50E-02 |  |  |

|  |  |                                                                                |          |  |  |
|--|--|--------------------------------------------------------------------------------|----------|--|--|
|  |  | of RNA metabolic process                                                       |          |  |  |
|  |  | GO:0048087~positive regulation of pigmentation during development              | 1.50E-02 |  |  |
|  |  | GO:0070059~apoptosis in response to endoplasmic reticulum stress               | 1.50E-02 |  |  |
|  |  | GO:0031557~induction of programmed cell death in response to chemical stimulus | 1.50E-02 |  |  |
|  |  | GO:0048609~reproductive process in a multicellular organism                    | 1.60E-02 |  |  |
|  |  | GO:0032504~multicellular organism reproduction                                 | 1.60E-02 |  |  |
|  |  | GO:0045619~regulation of lymphocyte differentiation                            | 1.60E-02 |  |  |
|  |  | GO:0031668~cellular response to extracellular stimulus                         | 1.60E-02 |  |  |
|  |  | GO:0006954~inflammatory response                                               | 1.70E-02 |  |  |
|  |  | GO:0051222~positive regulation of protein transport                            | 1.80E-02 |  |  |
|  |  | GO:0051726~regulation of cell cycle                                            | 1.80E-02 |  |  |
|  |  | GO:0006874~cellular calcium ion homeostasis                                    | 1.80E-02 |  |  |
|  |  | GO:0048304~positive regulation of isotype switching to IgG isotypes            | 1.80E-02 |  |  |
|  |  | GO:0030258~lipid modification                                                  | 1.90E-02 |  |  |
|  |  | GO:0048592~eye morphogenesis                                                   | 1.90E-02 |  |  |
|  |  | GO:0070302~regulation of stress-activated protein kinase signaling pathway     | 1.90E-02 |  |  |
|  |  | GO:0010720~positive regulation of cell development                             | 1.90E-02 |  |  |
|  |  | GO:0007229~integrin-mediated signaling pathway                                 | 1.90E-02 |  |  |
|  |  | GO:0050678~regulation of epithelial cell proliferation                         | 2.00E-02 |  |  |
|  |  | GO:0051960~regulation of nervous system development                            | 2.10E-02 |  |  |
|  |  | GO:0050663~cytokine secretion                                                  | 2.10E-02 |  |  |
|  |  | GO:0010893~positive regulation of steroid biosynthetic process                 | 2.10E-02 |  |  |
|  |  | GO:0043496~regulation of protein homodimerization activity                     | 2.10E-02 |  |  |
|  |  | GO:0046668~regulation of retinal                                               | 2.10E-02 |  |  |

|  |                                                                                 |          |  |  |
|--|---------------------------------------------------------------------------------|----------|--|--|
|  | cell programmed cell death                                                      |          |  |  |
|  | GO:0044255~cellular lipid metabolic process                                     | 2.10E-02 |  |  |
|  | GO:0006875~cellular metal ion homeostasis                                       | 2.20E-02 |  |  |
|  | GO:0005975~carbohydrate metabolic process                                       | 2.20E-02 |  |  |
|  | GO:0048646~anatomical structure formation involved in morphogenesis             | 2.20E-02 |  |  |
|  | GO:0048469~cell maturation                                                      | 2.20E-02 |  |  |
|  | GO:0031667~response to nutrient levels                                          | 2.20E-02 |  |  |
|  | GO:0009314~response to radiation                                                | 2.30E-02 |  |  |
|  | GO:0051046~regulation of secretion                                              | 2.30E-02 |  |  |
|  | GO:0008285~negative regulation of cell proliferation                            | 2.40E-02 |  |  |
|  | GO:0034097~response to cytokine stimulus                                        | 2.40E-02 |  |  |
|  | GO:0002902~regulation of B cell apoptosis                                       | 2.40E-02 |  |  |
|  | GO:0048302~regulation of isotype switching to IgG isotypes                      | 2.40E-02 |  |  |
|  | GO:0031998~regulation of fatty acid beta-oxidation                              | 2.40E-02 |  |  |
|  | GO:0032469~endoplasmic reticulum calcium ion homeostasis                        | 2.40E-02 |  |  |
|  | GO:0060284~regulation of cell development                                       | 2.40E-02 |  |  |
|  | GO:0045927~positive regulation of growth                                        | 2.50E-02 |  |  |
|  | GO:0000187~activation of MAPK activity                                          | 2.60E-02 |  |  |
|  | GO:0045944~positive regulation of transcription from RNA polymerase II promoter | 2.60E-02 |  |  |
|  | GO:0009266~response to temperature stimulus                                     | 2.60E-02 |  |  |
|  | GO:0006873~cellular ion homeostasis                                             | 2.70E-02 |  |  |
|  | GO:0046641~positive regulation of alpha-beta T cell proliferation               | 2.70E-02 |  |  |
|  | GO:0043368~positive T cell selection                                            | 2.70E-02 |  |  |
|  | GO:0045830~positive regulation of isotype switching                             | 2.70E-02 |  |  |
|  | GO:0002262~myeloid cell                                                         | 2.70E-02 |  |  |

|  |                                                                   |          |  |  |
|--|-------------------------------------------------------------------|----------|--|--|
|  | homeostasis                                                       |          |  |  |
|  | GO:0043491~protein kinase B signaling cascade                     | 2.70E-02 |  |  |
|  | GO:0045911~positive regulation of DNA recombination               | 2.70E-02 |  |  |
|  | GO:0009887~organ morphogenesis                                    | 2.80E-02 |  |  |
|  | GO:0045941~positive regulation of transcription                   | 2.80E-02 |  |  |
|  | GO:0046777~protein amino acid autophosphorylation                 | 2.80E-02 |  |  |
|  | GO:0055082~cellular chemical homeostasis                          | 2.80E-02 |  |  |
|  | GO:0006606~protein import into nucleus                            | 2.80E-02 |  |  |
|  | GO:0002443~leukocyte mediated immunity                            | 2.80E-02 |  |  |
|  | GO:0006469~negative regulation of protein kinase activity         | 2.90E-02 |  |  |
|  | GO:0051170~nuclear import                                         | 2.90E-02 |  |  |
|  | GO:0070227~lymphocyte apoptosis                                   | 3.00E-02 |  |  |
|  | GO:0032891~negative regulation of organic acid transport          | 3.00E-02 |  |  |
|  | GO:0048875~chemical homeostasis within a tissue                   | 3.00E-02 |  |  |
|  | GO:0043129~surfactant homeostasis                                 | 3.00E-02 |  |  |
|  | GO:0045725~positive regulation of glycogen biosynthetic process   | 3.00E-02 |  |  |
|  | GO:0033138~positive regulation of peptidyl-serine phosphorylation | 3.00E-02 |  |  |
|  | GO:0033673~negative regulation of kinase activity                 | 3.10E-02 |  |  |
|  | GO:0043523~regulation of neuron apoptosis                         | 3.10E-02 |  |  |
|  | GO:0010628~positive regulation of gene expression                 | 3.10E-02 |  |  |
|  | GO:0060429~epithelium development                                 | 3.20E-02 |  |  |
|  | GO:0030005~cellular di-, tri-valent inorganic cation homeostasis  | 3.20E-02 |  |  |
|  | GO:0051881~regulation of mitochondrial membrane potential         | 3.30E-02 |  |  |
|  | GO:0001782~B cell homeostasis                                     | 3.30E-02 |  |  |
|  | GO:0048070~regulation of pigmentation during development          | 3.30E-02 |  |  |
|  | GO:0046902~regulation of                                          | 3.30E-02 |  |  |



|  |  |                                                                    |          |  |  |
|--|--|--------------------------------------------------------------------|----------|--|--|
|  |  | mitochondrial membrane permeability                                |          |  |  |
|  |  | GO:0034504~protein localization in nucleus                         | 3.30E-02 |  |  |
|  |  | GO:0019932~second-messenger-mediated signaling                     | 3.50E-02 |  |  |
|  |  | GO:0001822~kidney development                                      | 3.50E-02 |  |  |
|  |  | GO:0009894~regulation of catabolic process                         | 3.50E-02 |  |  |
|  |  | GO:0051348~negative regulation of transferase activity             | 3.50E-02 |  |  |
|  |  | GO:0034613~cellular protein localization                           | 3.60E-02 |  |  |
|  |  | GO:0070228~regulation of lymphocyte apoptosis                      | 3.60E-02 |  |  |
|  |  | GO:0030324~lung development                                        | 3.60E-02 |  |  |
|  |  | GO:0070727~cellular macromolecule localization                     | 3.70E-02 |  |  |
|  |  | GO:0048585~negative regulation of response to stimulus             | 3.70E-02 |  |  |
|  |  | GO:0007281~germ cell development                                   | 3.80E-02 |  |  |
|  |  | GO:0051240~positive regulation of multicellular organismal process | 3.80E-02 |  |  |
|  |  | GO:0030323~respiratory tube development                            | 3.90E-02 |  |  |
|  |  | GO:0043406~positive regulation of MAP kinase activity              | 3.90E-02 |  |  |
|  |  | GO:0032770~positive regulation of monooxygenase activity           | 3.90E-02 |  |  |
|  |  | GO:0046640~regulation of alpha-beta T cell proliferation           | 3.90E-02 |  |  |
|  |  | GO:0045822~negative regulation of heart contraction                | 3.90E-02 |  |  |
|  |  | GO:0042100~B cell proliferation                                    | 3.90E-02 |  |  |
|  |  | GO:0045191~regulation of isotype switching                         | 3.90E-02 |  |  |
|  |  | GO:0006066~alcohol metabolic process                               | 4.10E-02 |  |  |
|  |  | GO:0005979~regulation of glycogen biosynthetic process             | 4.20E-02 |  |  |
|  |  | GO:0010962~regulation of glucan biosynthetic process               | 4.20E-02 |  |  |
|  |  | GO:0032885~regulation of polysaccharide biosynthetic process       | 4.20E-02 |  |  |
|  |  | GO:0045940~positive regulation of steroid metabolic process        | 4.20E-02 |  |  |

|                   |                                                                                                                      |                                                                          |          |                                        |          |
|-------------------|----------------------------------------------------------------------------------------------------------------------|--------------------------------------------------------------------------|----------|----------------------------------------|----------|
|                   |                                                                                                                      | GO:0030003~cellular cation homeostasis                                   | 4.20E-02 |                                        |          |
|                   |                                                                                                                      | GO:0051789~response to protein stimulus                                  | 4.20E-02 |                                        |          |
|                   |                                                                                                                      | GO:0043010~camera-type eye development                                   | 4.20E-02 |                                        |          |
|                   |                                                                                                                      | GO:0060541~respiratory system development                                | 4.30E-02 |                                        |          |
|                   |                                                                                                                      | GO:0031323~regulation of cellular metabolic process                      | 4.40E-02 |                                        |          |
|                   |                                                                                                                      | GO:0001655~urogenital system development                                 | 4.40E-02 |                                        |          |
|                   |                                                                                                                      | GO:0032369~negative regulation of lipid transport                        | 4.50E-02 |                                        |          |
|                   |                                                                                                                      | GO:0032881~regulation of polysaccharide metabolic process                | 4.50E-02 |                                        |          |
|                   |                                                                                                                      | GO:0051279~regulation of release of sequestered calcium ion into cytosol | 4.50E-02 |                                        |          |
|                   |                                                                                                                      | GO:0006810~transport                                                     | 4.50E-02 |                                        |          |
|                   |                                                                                                                      | GO:0045598~regulation of fat cell differentiation                        | 4.80E-02 |                                        |          |
|                   |                                                                                                                      | GO:0006887~exocytosis                                                    | 4.80E-02 |                                        |          |
|                   |                                                                                                                      | GO:0051234~establishment of localization                                 | 4.80E-02 |                                        |          |
|                   |                                                                                                                      | GO:0046907~intracellular transport                                       | 4.80E-02 |                                        |          |
|                   |                                                                                                                      | GO:0008104~protein localization                                          | 4.90E-02 |                                        |          |
| M <sub>(s4)</sub> | stat1, smad2, f9, rela, ccl2, osm, myc, timp1, pold3, cdkn2a, igf1, igf1r, csf1, ccl5, tp53, ccl3, csf3, ccl11, sod1 | GO:0042127~regulation of cell proliferation                              | 1.10E-11 | Pathways in cancer                     | 4.80E-05 |
|                   |                                                                                                                      | GO:0008284~positive regulation of cell proliferation                     | 5.70E-10 | Pancreatic cancer                      | 7.70E-05 |
|                   |                                                                                                                      | GO:0048522~positive regulation of cellular process                       | 7.50E-10 | Cytokine-cytokine receptor interaction | 1.40E-04 |
|                   |                                                                                                                      | GO:0048518~positive regulation of biological process                     | 2.70E-09 | Chemokine signaling pathway            | 2.80E-04 |
|                   |                                                                                                                      | GO:0002376~immune system process                                         | 4.20E-09 | NOD-like receptor signaling pathway    | 1.00E-03 |
|                   |                                                                                                                      | GO:0065008~regulation of biological quality                              | 1.60E-08 | Glioma                                 | 1.10E-03 |
|                   |                                                                                                                      | GO:0009605~response to external stimulus                                 | 3.40E-08 | Melanoma                               | 1.50E-03 |
|                   |                                                                                                                      | GO:0042592~homeostatic process                                           | 1.00E-07 | Chronic myeloid leukemia               | 1.80E-03 |
|                   |                                                                                                                      | GO:0009628~response to abiotic stimulus                                  | 1.90E-07 | Colorectal cancer                      | 2.50E-03 |
|                   |                                                                                                                      | GO:0050896~response to stimulus                                          | 3.00E-07 | Prostate cancer                        | 3.00E-03 |
|                   |                                                                                                                      | GO:0030003~cellular cation homeostasis                                   | 5.00E-07 | Toll-like receptor signaling pathway   | 4.20E-03 |

|  |                                                                  |          |                            |          |
|--|------------------------------------------------------------------|----------|----------------------------|----------|
|  | GO:0042221~response to chemical stimulus                         | 8.10E-07 | Cell cycle                 | 7.70E-03 |
|  | GO:0006955~immune response                                       | 8.90E-07 | Bladder cancer             | 8.40E-03 |
|  | GO:0006950~response to stress                                    | 9.70E-07 | Jak-STAT signaling pathway | 1.40E-02 |
|  | GO:0055080~cation homeostasis                                    | 9.90E-07 | p53 signaling pathway      | 2.10E-02 |
|  | GO:0048513~organ development                                     | 1.30E-06 | Small cell lung cancer     | 3.10E-02 |
|  | GO:0045595~regulation of cell differentiation                    | 1.40E-06 |                            |          |
|  | GO:0048878~chemical homeostasis                                  | 1.80E-06 |                            |          |
|  | GO:0048519~negative regulation of biological process             | 2.00E-06 |                            |          |
|  | GO:0009611~response to wounding                                  | 2.20E-06 |                            |          |
|  | GO:0048731~system development                                    | 2.80E-06 |                            |          |
|  | GO:0042981~regulation of apoptosis                               | 2.80E-06 |                            |          |
|  | GO:0043067~regulation of programmed cell death                   | 3.00E-06 |                            |          |
|  | GO:0010941~regulation of cell death                              | 3.10E-06 |                            |          |
|  | GO:0009887~organ morphogenesis                                   | 3.40E-06 |                            |          |
|  | GO:0043066~negative regulation of apoptosis                      | 3.40E-06 |                            |          |
|  | GO:0043069~negative regulation of programmed cell death          | 3.70E-06 |                            |          |
|  | GO:0060548~negative regulation of cell death                     | 3.80E-06 |                            |          |
|  | GO:0006916~anti-apoptosis                                        | 4.60E-06 |                            |          |
|  | GO:0006873~cellular ion homeostasis                              | 4.70E-06 |                            |          |
|  | GO:0055082~cellular chemical homeostasis                         | 5.20E-06 |                            |          |
|  | GO:0042493~response to drug                                      | 5.80E-06 |                            |          |
|  | GO:0048856~anatomical structure development                      | 6.70E-06 |                            |          |
|  | GO:0030005~cellular di-, tri-valent inorganic cation homeostasis | 7.40E-06 |                            |          |
|  | GO:0050801~ion homeostasis                                       | 7.90E-06 |                            |          |
|  | GO:0051239~regulation of multicellular organismal process        | 8.80E-06 |                            |          |
|  | GO:0048523~negative regulation of cellular process               | 8.80E-06 |                            |          |
|  | GO:0032502~developmental process                                 | 9.00E-06 |                            |          |
|  | GO:0055066~di-, tri-valent inorganic cation homeostasis          | 9.50E-06 |                            |          |

|  |                                                                                                         |          |  |  |
|--|---------------------------------------------------------------------------------------------------------|----------|--|--|
|  | GO:0007568~aging                                                                                        | 9.80E-06 |  |  |
|  | GO:0050793~regulation of developmental process                                                          | 1.10E-05 |  |  |
|  | GO:0019725~cellular homeostasis                                                                         | 1.70E-05 |  |  |
|  | GO:0010033~response to organic substance                                                                | 1.70E-05 |  |  |
|  | GO:0007165~signal transduction                                                                          | 2.40E-05 |  |  |
|  | GO:0007275~multicellular organismal development                                                         | 2.60E-05 |  |  |
|  | GO:0051716~cellular response to stimulus                                                                | 3.90E-05 |  |  |
|  | GO:0006919~activation of caspase activity                                                               | 4.10E-05 |  |  |
|  | GO:0032501~multicellular organismal process                                                             | 4.50E-05 |  |  |
|  | GO:0009612~response to mechanical stimulus                                                              | 4.60E-05 |  |  |
|  | GO:0010604~positive regulation of macromolecule metabolic process                                       | 5.20E-05 |  |  |
|  | GO:0009653~anatomical structure morphogenesis                                                           | 5.30E-05 |  |  |
|  | GO:0040008~regulation of growth                                                                         | 5.30E-05 |  |  |
|  | GO:0010952~positive regulation of peptidase activity                                                    | 5.40E-05 |  |  |
|  | GO:0043280~positive regulation of caspase activity                                                      | 5.40E-05 |  |  |
|  | GO:0010628~positive regulation of gene expression                                                       | 5.80E-05 |  |  |
|  | GO:0044093~positive regulation of molecular function                                                    | 6.00E-05 |  |  |
|  | GO:0031325~positive regulation of cellular metabolic process                                            | 6.20E-05 |  |  |
|  | GO:0045944~positive regulation of transcription from RNA polymerase II promoter                         | 7.90E-05 |  |  |
|  | GO:0009893~positive regulation of metabolic process                                                     | 8.30E-05 |  |  |
|  | GO:0045935~positive regulation of nucleobase, nucleoside, nucleotide and nucleic acid metabolic process | 8.60E-05 |  |  |
|  | GO:0019221~cytokine-mediated signaling pathway                                                          | 9.00E-05 |  |  |
|  | GO:0009607~response to biotic stimulus                                                                  | 9.30E-05 |  |  |
|  | GO:0031667~response to nutrient levels                                                                  | 9.70E-05 |  |  |

|  |                                                                       |          |  |  |
|--|-----------------------------------------------------------------------|----------|--|--|
|  | GO:0051173~positive regulation of nitrogen compound metabolic process | 1.00E-04 |  |  |
|  | GO:0009314~response to radiation                                      | 1.00E-04 |  |  |
|  | GO:0010557~positive regulation of macromolecule biosynthetic process  | 1.10E-04 |  |  |
|  | GO:0065009~regulation of molecular function                           | 1.10E-04 |  |  |
|  | GO:0032496~response to lipopolysaccharide                             | 1.20E-04 |  |  |
|  | GO:0006468~protein amino acid phosphorylation                         | 1.20E-04 |  |  |
|  | GO:0043281~regulation of caspase activity                             | 1.30E-04 |  |  |
|  | GO:0051704~multi-organism process                                     | 1.40E-04 |  |  |
|  | GO:0031328~positive regulation of cellular biosynthetic process       | 1.40E-04 |  |  |
|  | GO:0052548~regulation of endopeptidase activity                       | 1.40E-04 |  |  |
|  | GO:0009991~response to extracellular stimulus                         | 1.50E-04 |  |  |
|  | GO:0009891~positive regulation of biosynthetic process                | 1.60E-04 |  |  |
|  | GO:0052547~regulation of peptidase activity                           | 1.70E-04 |  |  |
|  | GO:0002237~response to molecule of bacterial origin                   | 1.70E-04 |  |  |
|  | GO:0065007~biological regulation                                      | 1.80E-04 |  |  |
|  | GO:0007610~behavior                                                   | 2.40E-04 |  |  |
|  | GO:0045893~positive regulation of transcription, DNA-dependent        | 2.60E-04 |  |  |
|  | GO:0006309~DNA fragmentation involved in apoptosis                    | 2.60E-04 |  |  |
|  | GO:0032868~response to insulin stimulus                               | 2.60E-04 |  |  |
|  | GO:0051254~positive regulation of RNA metabolic process               | 2.70E-04 |  |  |
|  | GO:0048534~hemopoietic or lymphoid organ development                  | 2.80E-04 |  |  |
|  | GO:0009892~negative regulation of metabolic process                   | 2.90E-04 |  |  |
|  | GO:0016310~phosphorylation                                            | 3.40E-04 |  |  |
|  | GO:0009615~response to virus                                          | 3.40E-04 |  |  |
|  | GO:0006259~DNA metabolic process                                      | 3.40E-04 |  |  |
|  | GO:0007626~locomotory behavior                                        | 3.40E-04 |  |  |

|  |  |                                                        |          |  |  |
|--|--|--------------------------------------------------------|----------|--|--|
|  |  | GO:0002520~immune system development                   | 3.50E-04 |  |  |
|  |  | GO:0006921~cell structure disassembly during apoptosis | 3.80E-04 |  |  |
|  |  | GO:0043085~positive regulation of catalytic activity   | 3.80E-04 |  |  |
|  |  | GO:0051052~regulation of DNA metabolic process         | 3.80E-04 |  |  |
|  |  | GO:0050794~regulation of cellular process              | 4.00E-04 |  |  |
|  |  | GO:0051707~response to other organism                  | 4.30E-04 |  |  |
|  |  | GO:0051246~regulation of protein metabolic process     | 4.80E-04 |  |  |
|  |  | GO:0030154~cell differentiation                        | 4.80E-04 |  |  |
|  |  | GO:0030262~apoptotic nuclear changes                   | 4.90E-04 |  |  |
|  |  | GO:0000737~DNA catabolic process, endonucleolytic      | 4.90E-04 |  |  |
|  |  | GO:0045941~positive regulation of transcription        | 5.60E-04 |  |  |
|  |  | GO:0007242~intracellular signaling cascade             | 5.70E-04 |  |  |
|  |  | GO:0048869~cellular developmental process              | 6.40E-04 |  |  |
|  |  | GO:0006954~inflammatory response                       | 6.50E-04 |  |  |
|  |  | GO:0080090~regulation of primary metabolic process     | 6.60E-04 |  |  |
|  |  | GO:0010647~positive regulation of cell communication   | 6.80E-04 |  |  |
|  |  | GO:0008637~apoptotic mitochondrial changes             | 7.00E-04 |  |  |
|  |  | GO:0051726~regulation of cell cycle                    | 7.00E-04 |  |  |
|  |  | GO:0050789~regulation of biological process            | 7.20E-04 |  |  |
|  |  | GO:0006915~apoptosis                                   | 7.50E-04 |  |  |
|  |  | GO:0007569~cell aging                                  | 7.90E-04 |  |  |
|  |  | GO:0012501~programmed cell death                       | 8.00E-04 |  |  |
|  |  | GO:0007346~regulation of mitotic cell cycle            | 8.90E-04 |  |  |
|  |  | GO:0043434~response to peptide hormone stimulus        | 9.20E-04 |  |  |
|  |  | GO:0006793~phosphorus metabolic process                | 9.50E-04 |  |  |
|  |  | GO:0006796~phosphate metabolic                         | 9.50E-04 |  |  |

|  |  |                                                                        |          |  |  |
|--|--|------------------------------------------------------------------------|----------|--|--|
|  |  | process                                                                |          |  |  |
|  |  | GO:0006935~chemotaxis                                                  | 1.00E-03 |  |  |
|  |  | GO:0042330~taxis                                                       | 1.00E-03 |  |  |
|  |  | GO:0009725~response to hormone stimulus                                | 1.00E-03 |  |  |
|  |  | GO:0031323~regulation of cellular metabolic process                    | 1.00E-03 |  |  |
|  |  | GO:0007243~protein kinase cascade                                      | 1.10E-03 |  |  |
|  |  | GO:0006979~response to oxidative stress                                | 1.10E-03 |  |  |
|  |  | GO:0007259~JAK-STAT cascade                                            | 1.10E-03 |  |  |
|  |  | GO:0002682~regulation of immune system process                         | 1.20E-03 |  |  |
|  |  | GO:0010646~regulation of cell communication                            | 1.30E-03 |  |  |
|  |  | GO:0051345~positive regulation of hydrolase activity                   | 1.40E-03 |  |  |
|  |  | GO:0009719~response to endogenous stimulus                             | 1.50E-03 |  |  |
|  |  | GO:0006874~cellular calcium ion homeostasis                            | 1.50E-03 |  |  |
|  |  | GO:0019222~regulation of metabolic process                             | 1.60E-03 |  |  |
|  |  | GO:0055074~calcium ion homeostasis                                     | 1.60E-03 |  |  |
|  |  | GO:0008219~cell death                                                  | 1.70E-03 |  |  |
|  |  | GO:0016265~death                                                       | 1.70E-03 |  |  |
|  |  | GO:0006357~regulation of transcription from RNA polymerase II promoter | 1.70E-03 |  |  |
|  |  | GO:0009617~response to bacterium                                       | 1.80E-03 |  |  |
|  |  | GO:0010605~negative regulation of macromolecule metabolic process      | 1.80E-03 |  |  |
|  |  | GO:0006875~cellular metal ion homeostasis                              | 1.80E-03 |  |  |
|  |  | GO:0043065~positive regulation of apoptosis                            | 1.90E-03 |  |  |
|  |  | GO:0043068~positive regulation of programmed cell death                | 1.90E-03 |  |  |
|  |  | GO:0010942~positive regulation of cell death                           | 1.90E-03 |  |  |
|  |  | GO:0008283~cell proliferation                                          | 1.90E-03 |  |  |
|  |  | GO:0006997~nucleus organization                                        | 2.00E-03 |  |  |
|  |  | GO:0022411~cellular component disassembly                              | 2.00E-03 |  |  |

|  |                                                                    |          |  |  |
|--|--------------------------------------------------------------------|----------|--|--|
|  | GO:0055065~metal ion homeostasis                                   | 2.10E-03 |  |  |
|  | GO:0042542~response to hydrogen peroxide                           | 2.30E-03 |  |  |
|  | GO:0009408~response to heat                                        | 2.30E-03 |  |  |
|  | GO:0042325~regulation of phosphorylation                           | 2.50E-03 |  |  |
|  | GO:0006308~DNA catabolic process                                   | 2.60E-03 |  |  |
|  | GO:0043687~post-translational protein modification                 | 2.60E-03 |  |  |
|  | GO:0032268~regulation of cellular protein metabolic process        | 2.60E-03 |  |  |
|  | GO:0040014~regulation of multicellular organism growth             | 2.70E-03 |  |  |
|  | GO:0006275~regulation of DNA replication                           | 2.80E-03 |  |  |
|  | GO:0019220~regulation of phosphate metabolic process               | 2.90E-03 |  |  |
|  | GO:0051174~regulation of phosphorus metabolic process              | 2.90E-03 |  |  |
|  | GO:0045597~positive regulation of cell differentiation             | 2.90E-03 |  |  |
|  | GO:0060255~regulation of macromolecule metabolic process           | 2.90E-03 |  |  |
|  | GO:0030097~hemopoiesis                                             | 3.10E-03 |  |  |
|  | GO:0050790~regulation of catalytic activity                        | 3.40E-03 |  |  |
|  | GO:0051240~positive regulation of multicellular organismal process | 3.40E-03 |  |  |
|  | GO:0031349~positive regulation of defense response                 | 3.80E-03 |  |  |
|  | GO:0009966~regulation of signal transduction                       | 4.00E-03 |  |  |
|  | GO:0000302~response to reactive oxygen species                     | 4.00E-03 |  |  |
|  | GO:0019538~protein metabolic process                               | 4.10E-03 |  |  |
|  | GO:0006355~regulation of transcription, DNA-dependent              | 4.40E-03 |  |  |
|  | GO:0034097~response to cytokine stimulus                           | 4.50E-03 |  |  |
|  | GO:0009266~response to temperature stimulus                        | 4.90E-03 |  |  |
|  | GO:0051094~positive regulation of developmental process            | 5.00E-03 |  |  |
|  | GO:0051252~regulation of RNA metabolic process                     | 5.00E-03 |  |  |



|  |                                                               |          |  |  |
|--|---------------------------------------------------------------|----------|--|--|
|  | GO:0043193~positive regulation of gene-specific transcription | 5.40E-03 |  |  |
|  | GO:0030335~positive regulation of cell migration              | 5.60E-03 |  |  |
|  | GO:0006351~transcription, DNA-dependent                       | 5.70E-03 |  |  |
|  | GO:0009967~positive regulation of signal transduction         | 5.80E-03 |  |  |
|  | GO:0032774~RNA biosynthetic process                           | 5.90E-03 |  |  |
|  | GO:0009889~regulation of biosynthetic process                 | 6.00E-03 |  |  |
|  | GO:0030099~myeloid cell differentiation                       | 6.10E-03 |  |  |
|  | GO:0022008~neurogenesis                                       | 6.20E-03 |  |  |
|  | GO:0043170~macromolecule metabolic process                    | 6.40E-03 |  |  |
|  | GO:0032879~regulation of localization                         | 6.50E-03 |  |  |
|  | GO:0009894~regulation of catabolic process                    | 6.50E-03 |  |  |
|  | GO:0048598~embryonic morphogenesis                            | 6.50E-03 |  |  |
|  | GO:0006952~defense response                                   | 6.70E-03 |  |  |
|  | GO:0040017~positive regulation of locomotion                  | 6.80E-03 |  |  |
|  | GO:0051272~positive regulation of cell motion                 | 6.80E-03 |  |  |
|  | GO:0048872~homeostasis of number of cells                     | 7.10E-03 |  |  |
|  | GO:0006917~induction of apoptosis                             | 7.30E-03 |  |  |
|  | GO:0006464~protein modification process                       | 7.30E-03 |  |  |
|  | GO:0012502~induction of programmed cell death                 | 7.40E-03 |  |  |
|  | GO:0007050~cell cycle arrest                                  | 7.50E-03 |  |  |
|  | GO:0045672~positive regulation of osteoclast differentiation  | 7.60E-03 |  |  |
|  | GO:0007260~tyrosine phosphorylation of STAT protein           | 7.60E-03 |  |  |
|  | GO:0051336~regulation of hydrolase activity                   | 8.40E-03 |  |  |
|  | GO:0048247~lymphocyte chemotaxis                              | 8.90E-03 |  |  |
|  | GO:0010564~regulation of cell cycle process                   | 9.10E-03 |  |  |
|  | GO:0043412~biopolymer                                         | 9.30E-03 |  |  |

|  |  |                                                                                                |          |  |  |
|--|--|------------------------------------------------------------------------------------------------|----------|--|--|
|  |  | modification                                                                                   |          |  |  |
|  |  | GO:0007399~nervous system development                                                          | 9.90E-03 |  |  |
|  |  | GO:0044260~cellular macromolecule metabolic process                                            | 1.00E-02 |  |  |
|  |  | GO:0008285~negative regulation of cell proliferation                                           | 1.00E-02 |  |  |
|  |  | GO:0002521~leukocyte differentiation                                                           | 1.20E-02 |  |  |
|  |  | GO:0032583~regulation of gene-specific transcription                                           | 1.20E-02 |  |  |
|  |  | GO:0007005~mitochondrion organization                                                          | 1.30E-02 |  |  |
|  |  | GO:0007584~response to nutrient                                                                | 1.30E-02 |  |  |
|  |  | GO:0033081~regulation of T cell differentiation in the thymus                                  | 1.40E-02 |  |  |
|  |  | GO:0031347~regulation of defense response                                                      | 1.40E-02 |  |  |
|  |  | GO:0002675~positive regulation of acute inflammatory response                                  | 1.50E-02 |  |  |
|  |  | GO:0019219~regulation of nucleobase, nucleoside, nucleotide and nucleic acid metabolic process | 1.60E-02 |  |  |
|  |  | GO:0051098~regulation of binding                                                               | 1.60E-02 |  |  |
|  |  | GO:0007154~cell communication                                                                  | 1.60E-02 |  |  |
|  |  | GO:0040011~locomotion                                                                          | 1.60E-02 |  |  |
|  |  | GO:0010556~regulation of macromolecule biosynthetic process                                    | 1.60E-02 |  |  |
|  |  | GO:0051171~regulation of nitrogen compound metabolic process                                   | 1.70E-02 |  |  |
|  |  | GO:0010468~regulation of gene expression                                                       | 1.70E-02 |  |  |
|  |  | GO:0045069~regulation of viral genome replication                                              | 1.80E-02 |  |  |
|  |  | GO:0010740~positive regulation of protein kinase cascade                                       | 1.90E-02 |  |  |
|  |  | GO:0030334~regulation of cell migration                                                        | 1.90E-02 |  |  |
|  |  | GO:0046579~positive regulation of Ras protein signal transduction                              | 2.00E-02 |  |  |
|  |  | GO:0044267~cellular protein metabolic process                                                  | 2.10E-02 |  |  |
|  |  | GO:0031326~regulation of cellular biosynthetic process                                         | 2.10E-02 |  |  |
|  |  | GO:0006928~cell motion                                                                         | 2.10E-02 |  |  |
|  |  | GO:0051057~positive regulation                                                                 | 2.10E-02 |  |  |

|  |  |                                                                     |          |  |  |
|--|--|---------------------------------------------------------------------|----------|--|--|
|  |  | of small GTPase mediated signal transduction                        |          |  |  |
|  |  | GO:0043200~response to amino acid stimulus                          | 2.10E-02 |  |  |
|  |  | GO:0042177~negative regulation of protein catabolic process         | 2.10E-02 |  |  |
|  |  | GO:0002763~positive regulation of myeloid leukocyte differentiation | 2.30E-02 |  |  |
|  |  | GO:0009303~rRNA transcription                                       | 2.30E-02 |  |  |
|  |  | GO:0051248~negative regulation of protein metabolic process         | 2.30E-02 |  |  |
|  |  | GO:0040012~regulation of locomotion                                 | 2.40E-02 |  |  |
|  |  | GO:0048545~response to steroid hormone stimulus                     | 2.40E-02 |  |  |
|  |  | GO:0051960~regulation of nervous system development                 | 2.40E-02 |  |  |
|  |  | GO:0051270~regulation of cell motion                                | 2.50E-02 |  |  |
|  |  | GO:0006461~protein complex assembly                                 | 2.50E-02 |  |  |
|  |  | GO:0070271~protein complex biogenesis                               | 2.50E-02 |  |  |
|  |  | GO:0032570~response to progesterone stimulus                        | 2.50E-02 |  |  |
|  |  | GO:0050792~regulation of viral reproduction                         | 2.60E-02 |  |  |
|  |  | GO:0002673~regulation of acute inflammatory response                | 2.60E-02 |  |  |
|  |  | GO:0001836~release of cytochrome c from mitochondria                | 2.60E-02 |  |  |
|  |  | GO:0060284~regulation of cell development                           | 2.80E-02 |  |  |
|  |  | GO:0010035~response to inorganic substance                          | 2.80E-02 |  |  |
|  |  | GO:0045670~regulation of osteoclast differentiation                 | 2.80E-02 |  |  |
|  |  | GO:0016070~RNA metabolic process                                    | 2.80E-02 |  |  |
|  |  | GO:0032940~secretion by cell                                        | 2.80E-02 |  |  |
|  |  | GO:0010332~response to gamma radiation                              | 2.90E-02 |  |  |
|  |  | GO:0001101~response to acid                                         | 3.00E-02 |  |  |
|  |  | GO:0043331~response to dsRNA                                        | 3.10E-02 |  |  |
|  |  | GO:0048699~generation of neurons                                    | 3.20E-02 |  |  |
|  |  | GO:0009790~embryonic                                                | 3.40E-02 |  |  |

|  |  |                                                                      |          |  |  |
|--|--|----------------------------------------------------------------------|----------|--|--|
|  |  | development                                                          |          |  |  |
|  |  | GO:0001952~regulation of cell-matrix adhesion                        | 3.40E-02 |  |  |
|  |  | GO:0045449~regulation of transcription                               | 3.40E-02 |  |  |
|  |  | GO:0044085~cellular component biogenesis                             | 3.50E-02 |  |  |
|  |  | GO:0032270~positive regulation of cellular protein metabolic process | 3.50E-02 |  |  |
|  |  | GO:0045740~positive regulation of DNA replication                    | 3.50E-02 |  |  |
|  |  | GO:0019932~second-messenger-mediated signaling                       | 3.50E-02 |  |  |
|  |  | GO:0048584~positive regulation of response to stimulus               | 3.60E-02 |  |  |
|  |  | GO:0009987~cellular process                                          | 3.70E-02 |  |  |
|  |  | GO:0050729~positive regulation of inflammatory response              | 3.80E-02 |  |  |
|  |  | GO:0051247~positive regulation of protein metabolic process          | 3.80E-02 |  |  |
|  |  | GO:0006879~cellular iron ion homeostasis                             | 3.90E-02 |  |  |
|  |  | GO:0048661~positive regulation of smooth muscle cell proliferation   | 3.90E-02 |  |  |
|  |  | GO:0010627~regulation of protein kinase cascade                      | 3.90E-02 |  |  |
|  |  | GO:0044238~primary metabolic process                                 | 4.00E-02 |  |  |
|  |  | GO:0045639~positive regulation of myeloid cell differentiation       | 4.10E-02 |  |  |
|  |  | GO:0002573~myeloid leukocyte differentiation                         | 4.30E-02 |  |  |
|  |  | GO:0003006~reproductive developmental process                        | 4.30E-02 |  |  |
|  |  | GO:0048145~regulation of fibroblast proliferation                    | 4.40E-02 |  |  |
|  |  | GO:0055072~iron ion homeostasis                                      | 4.50E-02 |  |  |
|  |  | GO:0007422~peripheral nervous system development                     | 4.50E-02 |  |  |
|  |  | GO:0009895~negative regulation of catabolic process                  | 4.60E-02 |  |  |
|  |  | GO:0030595~leukocyte chemotaxis                                      | 4.60E-02 |  |  |
|  |  | GO:0048468~cell development                                          | 4.60E-02 |  |  |
|  |  | GO:0080134~regulation of response to stress                          | 4.70E-02 |  |  |
|  |  | GO:0006139~nucleobase,                                               | 4.70E-02 |  |  |

|                   |                                                   |                                                                   |          |                                |          |
|-------------------|---------------------------------------------------|-------------------------------------------------------------------|----------|--------------------------------|----------|
|                   |                                                   | nucleoside, nucleotide and nucleic acid metabolic process         |          |                                |          |
|                   |                                                   | GO:0051262~protein tetramerization                                | 4.90E-02 |                                |          |
|                   |                                                   | GO:0060326~cell chemotaxis                                        | 4.90E-02 |                                |          |
|                   |                                                   | GO:0014075~response to amine stimulus                             | 4.90E-02 |                                |          |
| M <sub>(s5)</sub> | slc16a1, slc16a3, slc16a7, slc16a8, cma1, slc16a4 | -                                                                 |          | -                              |          |
| M <sub>(s6)</sub> | eng, mcam, itgam, ptpcr, cd34                     | -                                                                 |          | Cell adhesion molecules (CAMs) | 6.80E-04 |
|                   |                                                   |                                                                   |          | Hematopoietic cell lineage     | 3.10E-02 |
| M <sub>(s7)</sub> | actb, il1rn, il1r2, pgk1, il1b                    | -                                                                 |          | Hematopoietic cell lineage     | 4.70E-02 |
| M <sub>(s8)</sub> | cdc25c, ifi27, cdk2, cdkn1a                       | GO:0051329~interphase of mitotic cell cycle                       | 5.30E-05 | -                              |          |
|                   |                                                   | GO:0051325~interphase                                             | 5.60E-05 |                                |          |
|                   |                                                   | GO:0051726~regulation of cell cycle                               | 5.50E-04 |                                |          |
|                   |                                                   | GO:0000278~mitotic cell cycle                                     | 6.90E-04 |                                |          |
|                   |                                                   | GO:0007089~traversing start control point of mitotic cell cycle   | 8.50E-04 |                                |          |
|                   |                                                   | GO:0022403~cell cycle phase                                       | 8.60E-04 |                                |          |
|                   |                                                   | GO:0022402~cell cycle process                                     | 1.60E-03 |                                |          |
|                   |                                                   | GO:0000080~G1 phase of mitotic cell cycle                         | 2.50E-03 |                                |          |
|                   |                                                   | GO:0051318~G1 phase                                               | 3.00E-03 |                                |          |
|                   |                                                   | GO:0000086~G2/M transition of mitotic cell cycle                  | 3.00E-03 |                                |          |
|                   |                                                   | GO:0007049~cell cycle                                             | 3.00E-03 |                                |          |
|                   |                                                   | GO:0000079~regulation of cyclin-dependent protein kinase activity | 7.60E-03 |                                |          |
|                   |                                                   | GO:0007346~regulation of mitotic cell cycle                       | 2.10E-02 |                                |          |
|                   |                                                   | GO:0006260~DNA replication                                        | 2.70E-02 |                                |          |
|                   |                                                   | GO:0007067~mitosis                                                | 3.10E-02 |                                |          |
|                   |                                                   | GO:0000280~nuclear division                                       | 3.10E-02 |                                |          |
|                   |                                                   | GO:0000087~M phase of mitotic cell cycle                          | 3.10E-02 |                                |          |
|                   |                                                   | GO:0048285~organelle fission                                      | 3.20E-02 |                                |          |
|                   |                                                   | GO:0051301~cell division                                          | 4.10E-02 |                                |          |
|                   |                                                   | GO:0000279~M phase                                                | 4.60E-02 |                                |          |

|                    |                            |                                                      |          |                                      |          |
|--------------------|----------------------------|------------------------------------------------------|----------|--------------------------------------|----------|
|                    |                            | GO:0045859~regulation of protein kinase activity     | 4.80E-02 |                                      |          |
| M <sub>(s9)</sub>  | ptgfrn, esr2, gja1, ptger4 | GO:0001764~neuron migration                          | 6.60E-03 | -                                    |          |
|                    |                            | GO:0008285~negative regulation of cell proliferation | 2.30E-02 |                                      |          |
|                    |                            | GO:0016477~cell migration                            | 2.40E-02 |                                      |          |
|                    |                            | GO:0048870~cell motility                             | 2.60E-02 |                                      |          |
|                    |                            | GO:0051674~localization of cell                      | 2.60E-02 |                                      |          |
|                    |                            | GO:0006928~cell motion                               | 3.10E-02 |                                      |          |
|                    |                            | GO:0040011~locomotion                                | 3.40E-02 |                                      |          |
|                    |                            | GO:0048699~generation of neurons                     | 3.50E-02 |                                      |          |
|                    |                            | GO:0022008~neurogenesis                              | 3.90E-02 |                                      |          |
| M <sub>(s10)</sub> | cd68, snai2, fap, actin    | -                                                    |          | -                                    |          |
| M <sub>(s11)</sub> | cxcr4, par1, itk, mirn200b | GO:0006952~defense response                          | 4.40E-02 | Leukocyte transendothelial migration | 2.30E-02 |
|                    |                            | GO:0006468~protein amino acid phosphorylation        | 4.70E-02 | Chemokine signaling pathway          | 3.70E-02 |

**Table 5**

**1042 GO biological functions and 71 KEGG pathways in top 10 non-overlapping modules of Aspirin network**

| Modules           | Genes                                                                                                                                                                                                                                                                                                                                           | GOTERM_BP_ALL                                             |          | KEGG_PATHWAY                           |          |
|-------------------|-------------------------------------------------------------------------------------------------------------------------------------------------------------------------------------------------------------------------------------------------------------------------------------------------------------------------------------------------|-----------------------------------------------------------|----------|----------------------------------------|----------|
|                   |                                                                                                                                                                                                                                                                                                                                                 | Term                                                      | P-value  | Term                                   | P-value  |
| M <sub>(a1)</sub> | idh2, ccr6, dlst, il23r, ogdh, mcam, tnfsf10, idh3a, ceacam1, eno1, tnfsf13b, aldoa, cd28, gpi, map3k4, fbp1, ptpn13, taldo1, ctsh, pgk1, ltb, arntl, atf5, furin, itgal, cxcr6, mmrn1, tgfb1, icam1, cd40lg, faslg, tnc, itgb2, itga5, col11a1, col5a1, akt1, adamts8, fn1, ctnd2, tp53, mmp8, clec3b, cdkn1a, timp1, hmi, birc3, bbc3, bnip1, | GO:0042981~regulation of apoptosis                        | 1.10E-13 | Alzheimer's disease                    | 5.00E-08 |
|                   |                                                                                                                                                                                                                                                                                                                                                 | GO:0043067~regulation of programmed cell death            | 1.30E-13 | Huntington's disease                   | 1.60E-07 |
|                   |                                                                                                                                                                                                                                                                                                                                                 | GO:0010941~regulation of cell death                       | 1.50E-13 | Parkinson's disease                    | 2.90E-07 |
|                   |                                                                                                                                                                                                                                                                                                                                                 | GO:0043065~positive regulation of apoptosis               | 8.80E-13 | Cytokine-cytokine receptor interaction | 2.10E-06 |
|                   |                                                                                                                                                                                                                                                                                                                                                 | GO:0043068~positive regulation of programmed cell death   | 1.00E-12 | Oxidative phosphorylation              | 2.90E-06 |
|                   |                                                                                                                                                                                                                                                                                                                                                 | GO:0010942~positive regulation of cell death              | 1.10E-12 | ECM-receptor interaction               | 6.20E-05 |
|                   |                                                                                                                                                                                                                                                                                                                                                 | GO:0006091~generation of precursor metabolites and energy | 4.90E-12 | Apoptosis                              | 7.70E-05 |
|                   |                                                                                                                                                                                                                                                                                                                                                 | GO:0006917~induction of apoptosis                         | 7.70E-11 | Citrate cycle (TCA cycle)              | 4.90E-04 |
|                   |                                                                                                                                                                                                                                                                                                                                                 | GO:0012502~induction of programmed cell death             | 8.10E-11 | Viral myocarditis                      | 1.60E-03 |
|                   |                                                                                                                                                                                                                                                                                                                                                 | GO:0009605~response to external stimulus                  | 9.50E-11 | Focal adhesion                         | 2.80E-03 |

|                                                                                                                                                                                                                                                                                   |                                                                |          |                                           |          |
|-----------------------------------------------------------------------------------------------------------------------------------------------------------------------------------------------------------------------------------------------------------------------------------|----------------------------------------------------------------|----------|-------------------------------------------|----------|
| birc8, casp9, casp7, cox2, col4a3, cd5, utp11l, znf443, tnfrsf1b, tp73, itga6, tiaf1, tnfrsf25, sst, stk17a, cd44, nr3c1, spp1, tnf, il17a, cebpg, runx1, sparc, ctgf, ndufb10, ndufa5, sdha, ndufs1, adamts1, cox5a, uqcrh, atp5a1, ccl20, cox5b, il22, atp5h, il26, atp5b, rorc | GO:0006915~apoptosis                                           | 3.80E-10 | Pentose phosphate pathway                 | 3.30E-03 |
|                                                                                                                                                                                                                                                                                   | GO:0012501~programmed cell death                               | 4.90E-10 | Small cell lung cancer                    | 3.40E-03 |
|                                                                                                                                                                                                                                                                                   | GO:0009611~response to wounding                                | 2.30E-09 | Glycolysis / Gluconeogenesis              | 5.90E-03 |
|                                                                                                                                                                                                                                                                                   | GO:0008219~cell death                                          | 8.10E-09 | p53 signaling pathway                     | 9.10E-03 |
|                                                                                                                                                                                                                                                                                   | GO:0016265~death                                               | 9.10E-09 | Allograft rejection                       | 9.30E-03 |
|                                                                                                                                                                                                                                                                                   | GO:0007155~cell adhesion                                       | 3.00E-08 | Hematopoietic cell lineage                | 2.00E-02 |
|                                                                                                                                                                                                                                                                                   | GO:0022610~biological adhesion                                 | 3.10E-08 | Cell adhesion molecules (CAMs)            | 2.20E-02 |
|                                                                                                                                                                                                                                                                                   | GO:0048522~positive regulation of cellular process             | 5.10E-08 | Natural killer cell mediated cytotoxicity | 2.20E-02 |
|                                                                                                                                                                                                                                                                                   | GO:0006954~inflammatory response                               | 7.70E-08 | Amyotrophic lateral sclerosis (ALS)       | 2.60E-02 |
|                                                                                                                                                                                                                                                                                   | GO:0002376~immune system process                               | 8.40E-08 | Pathways in cancer                        | 4.40E-02 |
|                                                                                                                                                                                                                                                                                   | GO:0045333~cellular respiration                                | 1.30E-07 |                                           |          |
|                                                                                                                                                                                                                                                                                   | GO:0048518~positive regulation of biological process           | 1.30E-07 |                                           |          |
|                                                                                                                                                                                                                                                                                   | GO:0015980~energy derivation by oxidation of organic compounds | 2.20E-07 |                                           |          |
|                                                                                                                                                                                                                                                                                   | GO:0007159~leukocyte adhesion                                  | 6.60E-07 |                                           |          |
|                                                                                                                                                                                                                                                                                   | GO:0050896~response to stimulus                                | 1.20E-06 |                                           |          |
|                                                                                                                                                                                                                                                                                   | GO:0006950~response to stress                                  | 1.30E-06 |                                           |          |
|                                                                                                                                                                                                                                                                                   | GO:0043066~negative regulation of apoptosis                    | 1.50E-06 |                                           |          |
|                                                                                                                                                                                                                                                                                   | GO:0043069~negative regulation of programmed cell death        | 1.70E-06 |                                           |          |
|                                                                                                                                                                                                                                                                                   | GO:0060548~negative regulation of cell death                   | 1.80E-06 |                                           |          |
|                                                                                                                                                                                                                                                                                   | GO:0006119~oxidative phosphorylation                           | 2.10E-06 |                                           |          |
|                                                                                                                                                                                                                                                                                   | GO:0006955~immune response                                     | 3.50E-06 |                                           |          |
|                                                                                                                                                                                                                                                                                   | GO:0006952~defense response                                    | 4.00E-06 |                                           |          |
|                                                                                                                                                                                                                                                                                   | GO:0007229~integrin-mediated signaling pathway                 | 4.10E-06 |                                           |          |
|                                                                                                                                                                                                                                                                                   | GO:0006006~glucose metabolic process                           | 4.10E-06 |                                           |          |
|                                                                                                                                                                                                                                                                                   | GO:0048856~anatomical                                          | 5.80E-06 |                                           |          |

|  |  |                                                      |          |  |  |
|--|--|------------------------------------------------------|----------|--|--|
|  |  | structure development                                |          |  |  |
|  |  | GO:0016337~cell-cell adhesion                        | 6.60E-06 |  |  |
|  |  | GO:0016477~cell migration                            | 6.60E-06 |  |  |
|  |  | GO:0043525~positive regulation of neuron apoptosis   | 8.60E-06 |  |  |
|  |  | GO:0052548~regulation of endopeptidase activity      | 1.00E-05 |  |  |
|  |  | GO:0040011~locomotion                                | 1.10E-05 |  |  |
|  |  | GO:0052547~regulation of peptidase activity          | 1.40E-05 |  |  |
|  |  | GO:0051674~localization of cell                      | 1.70E-05 |  |  |
|  |  | GO:0048870~cell motility                             | 1.70E-05 |  |  |
|  |  | GO:0048519~negative regulation of biological process | 1.70E-05 |  |  |
|  |  | GO:0043523~regulation of neuron apoptosis            | 1.80E-05 |  |  |
|  |  | GO:0019318~hexose metabolic process                  | 2.20E-05 |  |  |
|  |  | GO:0048731~system development                        | 2.60E-05 |  |  |
|  |  | GO:0006007~glucose catabolic process                 | 2.70E-05 |  |  |
|  |  | GO:0006928~cell motion                               | 2.90E-05 |  |  |
|  |  | GO:0008637~apoptotic mitochondrial changes           | 3.60E-05 |  |  |
|  |  | GO:0006916~anti-apoptosis                            | 3.60E-05 |  |  |
|  |  | GO:0048523~negative regulation of cellular process   | 3.60E-05 |  |  |
|  |  | GO:0022904~respiratory electron transport chain      | 4.30E-05 |  |  |
|  |  | GO:0009060~aerobic respiration                       | 5.80E-05 |  |  |
|  |  | GO:0005996~monosaccharide metabolic process          | 6.10E-05 |  |  |
|  |  | GO:0019320~hexose catabolic process                  | 6.20E-05 |  |  |
|  |  | GO:0046365~monosaccharide catabolic process          | 7.10E-05 |  |  |
|  |  | GO:0048513~organ development                         | 7.60E-05 |  |  |
|  |  | GO:0043281~regulation of caspase activity            | 1.20E-04 |  |  |
|  |  | GO:0044262~cellular carbohydrate metabolic process   | 1.20E-04 |  |  |



|  |  |                                                                   |          |  |  |
|--|--|-------------------------------------------------------------------|----------|--|--|
|  |  | GO:0046164~alcohol catabolic process                              | 1.30E-04 |  |  |
|  |  | GO:0065008~regulation of biological quality                       | 1.50E-04 |  |  |
|  |  | GO:0044275~cellular carbohydrate catabolic process                | 1.70E-04 |  |  |
|  |  | GO:0001558~regulation of cell growth                              | 1.80E-04 |  |  |
|  |  | GO:0006096~glycolysis                                             | 1.90E-04 |  |  |
|  |  | GO:0007275~multicellular organismal development                   | 2.10E-04 |  |  |
|  |  | GO:0032502~developmental process                                  | 2.30E-04 |  |  |
|  |  | GO:0032501~multicellular organismal process                       | 2.30E-04 |  |  |
|  |  | GO:0001836~release of cytochrome c from mitochondria              | 2.70E-04 |  |  |
|  |  | GO:0042176~regulation of protein catabolic process                | 2.80E-04 |  |  |
|  |  | GO:0006919~activation of caspase activity                         | 3.20E-04 |  |  |
|  |  | GO:0045792~negative regulation of cell size                       | 3.40E-04 |  |  |
|  |  | GO:0006099~tricarboxylic acid cycle                               | 3.50E-04 |  |  |
|  |  | GO:0046356~acetyl-CoA catabolic process                           | 3.50E-04 |  |  |
|  |  | GO:0005975~carbohydrate metabolic process                         | 3.60E-04 |  |  |
|  |  | GO:0042775~mitochondrial ATP synthesis coupled electron transport | 3.70E-04 |  |  |
|  |  | GO:0042773~ATP synthesis coupled electron transport               | 3.70E-04 |  |  |
|  |  | GO:0009411~response to UV                                         | 4.50E-04 |  |  |
|  |  | GO:0043280~positive regulation of caspase activity                | 4.50E-04 |  |  |
|  |  | GO:0010952~positive regulation of peptidase activity              | 4.50E-04 |  |  |
|  |  | GO:0009109~coenzyme catabolic process                             | 5.10E-04 |  |  |
|  |  | GO:0016052~carbohydrate catabolic process                         | 5.30E-04 |  |  |
|  |  | GO:0045926~negative regulation of growth                          | 5.50E-04 |  |  |
|  |  | GO:0022900~electron transport chain                               | 6.50E-04 |  |  |

|  |                                                             |          |  |  |
|--|-------------------------------------------------------------|----------|--|--|
|  | GO:0033627~cell adhesion mediated by integrin               | 7.60E-04 |  |  |
|  | GO:0006084~acetyl-CoA metabolic process                     | 8.70E-04 |  |  |
|  | GO:0051187~cofactor catabolic process                       | 8.70E-04 |  |  |
|  | GO:0042127~regulation of cell proliferation                 | 9.10E-04 |  |  |
|  | GO:0048534~hemopoietic or lymphoid organ development        | 1.00E-03 |  |  |
|  | GO:0040008~regulation of growth                             | 1.10E-03 |  |  |
|  | GO:0065007~biological regulation                            | 1.10E-03 |  |  |
|  | GO:0000060~protein import into nucleus, translocation       | 1.10E-03 |  |  |
|  | GO:0050794~regulation of cellular process                   | 1.20E-03 |  |  |
|  | GO:0009987~cellular process                                 | 1.30E-03 |  |  |
|  | GO:0002520~immune system development                        | 1.50E-03 |  |  |
|  | GO:0009895~negative regulation of catabolic process         | 1.50E-03 |  |  |
|  | GO:0030155~regulation of cell adhesion                      | 1.50E-03 |  |  |
|  | GO:0008285~negative regulation of cell proliferation        | 1.60E-03 |  |  |
|  | GO:0032891~negative regulation of organic acid transport    | 1.60E-03 |  |  |
|  | GO:0009628~response to abiotic stimulus                     | 1.80E-03 |  |  |
|  | GO:0001775~cell activation                                  | 1.80E-03 |  |  |
|  | GO:0050789~regulation of biological process                 | 2.00E-03 |  |  |
|  | GO:0006753~nucleoside phosphate metabolic process           | 2.00E-03 |  |  |
|  | GO:0009117~nucleotide metabolic process                     | 2.00E-03 |  |  |
|  | GO:0048583~regulation of response to stimulus               | 2.10E-03 |  |  |
|  | GO:0007160~cell-matrix adhesion                             | 2.10E-03 |  |  |
|  | GO:0009653~anatomical structure morphogenesis               | 2.10E-03 |  |  |
|  | GO:0022603~regulation of anatomical structure morphogenesis | 2.20E-03 |  |  |

|  |  |                                                                    |          |  |  |
|--|--|--------------------------------------------------------------------|----------|--|--|
|  |  | GO:0009991~response to extracellular stimulus                      | 2.20E-03 |  |  |
|  |  | GO:0002682~regulation of immune system process                     | 2.40E-03 |  |  |
|  |  | GO:0030308~negative regulation of cell growth                      | 2.40E-03 |  |  |
|  |  | GO:0002286~T cell activation during immune response                | 2.70E-03 |  |  |
|  |  | GO:0051043~regulation of membrane protein ectodomain proteolysis   | 2.70E-03 |  |  |
|  |  | GO:0009894~regulation of catabolic process                         | 2.80E-03 |  |  |
|  |  | GO:0031328~positive regulation of cellular biosynthetic process    | 2.90E-03 |  |  |
|  |  | GO:0031589~cell-substrate adhesion                                 | 3.00E-03 |  |  |
|  |  | GO:0042108~positive regulation of cytokine biosynthetic process    | 3.10E-03 |  |  |
|  |  | GO:0055086~nucleobase, nucleoside and nucleotide metabolic process | 3.10E-03 |  |  |
|  |  | GO:0030097~hemopoiesis                                             | 3.20E-03 |  |  |
|  |  | GO:0009891~positive regulation of biosynthetic process             | 3.20E-03 |  |  |
|  |  | GO:0016310~phosphorylation                                         | 3.20E-03 |  |  |
|  |  | GO:0080135~regulation of cellular response to stress               | 3.60E-03 |  |  |
|  |  | GO:0009893~positive regulation of metabolic process                | 3.70E-03 |  |  |
|  |  | GO:0001568~blood vessel development                                | 3.80E-03 |  |  |
|  |  | GO:0046034~ATP metabolic process                                   | 3.80E-03 |  |  |
|  |  | GO:0030162~regulation of proteolysis                               | 4.10E-03 |  |  |
|  |  | GO:0010627~regulation of protein kinase cascade                    | 4.10E-03 |  |  |
|  |  | GO:0001944~vasculature development                                 | 4.30E-03 |  |  |
|  |  | GO:0008629~induction of apoptosis by intracellular signals         | 4.30E-03 |  |  |
|  |  | GO:0006066~alcohol                                                 | 4.60E-03 |  |  |

|  |  |                                                                      |          |  |  |
|--|--|----------------------------------------------------------------------|----------|--|--|
|  |  | metabolic process                                                    |          |  |  |
|  |  | GO:0006000~fructose metabolic process                                | 4.70E-03 |  |  |
|  |  | GO:0032890~regulation of organic acid transport                      | 4.70E-03 |  |  |
|  |  | GO:0008624~induction of apoptosis by extracellular signals           | 4.80E-03 |  |  |
|  |  | GO:0001817~regulation of cytokine production                         | 4.90E-03 |  |  |
|  |  | GO:0045787~positive regulation of cell cycle                         | 5.00E-03 |  |  |
|  |  | GO:0050900~leukocyte migration                                       | 5.00E-03 |  |  |
|  |  | GO:0002285~lymphocyte activation during immune response              | 5.30E-03 |  |  |
|  |  | GO:0010604~positive regulation of macromolecule metabolic process    | 5.60E-03 |  |  |
|  |  | GO:0009205~purine ribonucleoside triphosphate metabolic process      | 5.60E-03 |  |  |
|  |  | GO:0006793~phosphorus metabolic process                              | 5.80E-03 |  |  |
|  |  | GO:0006796~phosphate metabolic process                               | 5.80E-03 |  |  |
|  |  | GO:0009199~ribonucleoside triphosphate metabolic process             | 5.80E-03 |  |  |
|  |  | GO:0031329~regulation of cellular catabolic process                  | 6.10E-03 |  |  |
|  |  | GO:0042060~wound healing                                             | 6.20E-03 |  |  |
|  |  | GO:0010557~positive regulation of macromolecule biosynthetic process | 6.30E-03 |  |  |
|  |  | GO:0031330~negative regulation of cellular catabolic process         | 6.50E-03 |  |  |
|  |  | GO:0080134~regulation of response to stress                          | 6.50E-03 |  |  |
|  |  | GO:0009144~purine nucleoside triphosphate metabolic process          | 6.50E-03 |  |  |
|  |  | GO:0051128~regulation of cellular component organization             | 6.70E-03 |  |  |
|  |  | GO:0031325~positive regulation of cellular                           | 6.90E-03 |  |  |

|  |  |                                                                     |          |  |  |
|--|--|---------------------------------------------------------------------|----------|--|--|
|  |  | metabolic process                                                   |          |  |  |
|  |  | GO:0045429~positive regulation of nitric oxide biosynthetic process | 7.10E-03 |  |  |
|  |  | GO:0009887~organ morphogenesis                                      | 7.30E-03 |  |  |
|  |  | GO:0046649~lymphocyte activation                                    | 7.30E-03 |  |  |
|  |  | GO:0008633~activation of pro-apoptotic gene products                | 7.80E-03 |  |  |
|  |  | GO:0007157~heterophilic cell adhesion                               | 7.80E-03 |  |  |
|  |  | GO:0009141~nucleoside triphosphate metabolic process                | 8.40E-03 |  |  |
|  |  | GO:0002521~leukocyte differentiation                                | 8.40E-03 |  |  |
|  |  | GO:0008361~regulation of cell size                                  | 8.50E-03 |  |  |
|  |  | GO:0007044~cell-substrate junction assembly                         | 8.50E-03 |  |  |
|  |  | GO:0007154~cell communication                                       | 8.70E-03 |  |  |
|  |  | GO:0009150~purine ribonucleotide metabolic process                  | 1.00E-02 |  |  |
|  |  | GO:0007005~mitochondrion organization                               | 1.00E-02 |  |  |
|  |  | GO:0009416~response to light stimulus                               | 1.00E-02 |  |  |
|  |  | GO:0045840~positive regulation of mitosis                           | 1.00E-02 |  |  |
|  |  | GO:0045862~positive regulation of proteolysis                       | 1.00E-02 |  |  |
|  |  | GO:0051785~positive regulation of nuclear division                  | 1.00E-02 |  |  |
|  |  | GO:0042035~regulation of cytokine biosynthetic process              | 1.00E-02 |  |  |
|  |  | GO:0051239~regulation of multicellular organismal process           | 1.10E-02 |  |  |
|  |  | GO:0045428~regulation of nitric oxide biosynthetic process          | 1.20E-02 |  |  |
|  |  | GO:0045732~positive regulation of protein catabolic process         | 1.20E-02 |  |  |
|  |  | GO:0002291~T cell activation via T cell receptor contact with       | 1.20E-02 |  |  |

|  |  |                                                                                         |          |  |  |
|--|--|-----------------------------------------------------------------------------------------|----------|--|--|
|  |  | antigen bound to MHC molecule on antigen presenting cell                                |          |  |  |
|  |  | GO:0006959~humoral immune response                                                      | 1.20E-02 |  |  |
|  |  | GO:0009259~ribonucleotide metabolic process                                             | 1.20E-02 |  |  |
|  |  | GO:0050670~regulation of lymphocyte proliferation                                       | 1.40E-02 |  |  |
|  |  | GO:0065009~regulation of molecular function                                             | 1.40E-02 |  |  |
|  |  | GO:0006732~coenzyme metabolic process                                                   | 1.40E-02 |  |  |
|  |  | GO:0070663~regulation of leukocyte proliferation                                        | 1.50E-02 |  |  |
|  |  | GO:0032944~regulation of mononuclear cell proliferation                                 | 1.50E-02 |  |  |
|  |  | GO:0006606~protein import into nucleus                                                  | 1.60E-02 |  |  |
|  |  | GO:0055114~oxidation reduction                                                          | 1.60E-02 |  |  |
|  |  | GO:0045321~leukocyte activation                                                         | 1.60E-02 |  |  |
|  |  | GO:0006970~response to osmotic stress                                                   | 1.60E-02 |  |  |
|  |  | GO:0051173~positive regulation of nitrogen compound metabolic process                   | 1.60E-02 |  |  |
|  |  | GO:0051170~nuclear import                                                               | 1.70E-02 |  |  |
|  |  | GO:0051336~regulation of hydrolase activity                                             | 1.70E-02 |  |  |
|  |  | GO:0006754~ATP biosynthetic process                                                     | 1.70E-02 |  |  |
|  |  | GO:0046324~regulation of glucose import                                                 | 1.70E-02 |  |  |
|  |  | GO:0008630~DNA damage response, signal transduction resulting in induction of apoptosis | 1.70E-02 |  |  |
|  |  | GO:0051246~regulation of protein metabolic process                                      | 1.80E-02 |  |  |
|  |  | GO:0010827~regulation of glucose transport                                              | 1.80E-02 |  |  |
|  |  | GO:0043648~dicarboxylic acid metabolic process                                          | 1.80E-02 |  |  |
|  |  | GO:0060553~induction of necroptosis                                                     | 1.80E-02 |  |  |
|  |  | GO:0060545~positive                                                                     | 1.80E-02 |  |  |

|  |  |                                                                     |          |  |  |
|--|--|---------------------------------------------------------------------|----------|--|--|
|  |  | regulation of necroptosis                                           |          |  |  |
|  |  | GO:0060544~regulation of necroptosis                                | 1.80E-02 |  |  |
|  |  | GO:0060555~induction of necroptosis by extracellular signals        | 1.80E-02 |  |  |
|  |  | GO:0030154~cell differentiation                                     | 1.90E-02 |  |  |
|  |  | GO:0030099~myeloid cell differentiation                             | 1.90E-02 |  |  |
|  |  | GO:0034504~protein localization in nucleus                          | 2.00E-02 |  |  |
|  |  | GO:0002263~cell activation during immune response                   | 2.00E-02 |  |  |
|  |  | GO:0031331~positive regulation of cellular catabolic process        | 2.00E-02 |  |  |
|  |  | GO:0002366~leukocyte activation during immune response              | 2.00E-02 |  |  |
|  |  | GO:0050793~regulation of developmental process                      | 2.10E-02 |  |  |
|  |  | GO:0051251~positive regulation of lymphocyte activation             | 2.10E-02 |  |  |
|  |  | GO:0043123~positive regulation of I-kappaB kinase/NF-kappaB cascade | 2.10E-02 |  |  |
|  |  | GO:0009206~purine ribonucleoside triphosphate biosynthetic process  | 2.20E-02 |  |  |
|  |  | GO:0009145~purine nucleoside triphosphate biosynthetic process      | 2.30E-02 |  |  |
|  |  | GO:0009201~ribonucleoside triphosphate biosynthetic process         | 2.30E-02 |  |  |
|  |  | GO:0048872~homeostasis of number of cells                           | 2.30E-02 |  |  |
|  |  | GO:0002697~regulation of immune effector process                    | 2.40E-02 |  |  |
|  |  | GO:0051345~positive regulation of hydrolase activity                | 2.40E-02 |  |  |
|  |  | GO:0002037~negative regulation of L-glutamate transport             | 2.40E-02 |  |  |
|  |  | GO:0010940~positive regulation of necrotic cell                     | 2.40E-02 |  |  |

|  |  |                                                                           |          |  |  |
|--|--|---------------------------------------------------------------------------|----------|--|--|
|  |  | death                                                                     |          |  |  |
|  |  | GO:0048305~immunoglobulin secretion                                       | 2.40E-02 |  |  |
|  |  | GO:0009142~nucleoside triphosphate biosynthetic process                   | 2.40E-02 |  |  |
|  |  | GO:0006769~nicotinamide metabolic process                                 | 2.50E-02 |  |  |
|  |  | GO:0046496~nicotinamide nucleotide metabolic process                      | 2.50E-02 |  |  |
|  |  | GO:0015985~energy coupled proton transport, down electrochemical gradient | 2.50E-02 |  |  |
|  |  | GO:0015986~ATP synthesis coupled proton transport                         | 2.50E-02 |  |  |
|  |  | GO:0032535~regulation of cellular component size                          | 2.50E-02 |  |  |
|  |  | GO:0030098~lymphocyte differentiation                                     | 2.50E-02 |  |  |
|  |  | GO:0032268~regulation of cellular protein metabolic process               | 2.50E-02 |  |  |
|  |  | GO:0009820~alkaloid metabolic process                                     | 2.60E-02 |  |  |
|  |  | GO:0034329~cell junction assembly                                         | 2.60E-02 |  |  |
|  |  | GO:0044093~positive regulation of molecular function                      | 2.60E-02 |  |  |
|  |  | GO:0006163~purine nucleotide metabolic process                            | 2.70E-02 |  |  |
|  |  | GO:0002696~positive regulation of leukocyte activation                    | 2.70E-02 |  |  |
|  |  | GO:0019362~pyridine nucleotide metabolic process                          | 2.70E-02 |  |  |
|  |  | GO:0006120~mitochondrial electron transport, NADH to ubiquinone           | 2.70E-02 |  |  |
|  |  | GO:0048869~cellular developmental process                                 | 2.70E-02 |  |  |
|  |  | GO:0051716~cellular response to stimulus                                  | 2.70E-02 |  |  |
|  |  | GO:0043122~regulation of I-kappaB kinase/NF-kappaB cascade                | 2.80E-02 |  |  |
|  |  | GO:0019058~viral infectious cycle                                         | 2.80E-02 |  |  |



|  |  |                                                                   |          |  |  |
|--|--|-------------------------------------------------------------------|----------|--|--|
|  |  | GO:0007267~cell-cell signaling                                    | 3.00E-02 |  |  |
|  |  | GO:0009180~purine ribonucleoside diphosphate biosynthetic process | 3.00E-02 |  |  |
|  |  | GO:0006102~isocitrate metabolic process                           | 3.00E-02 |  |  |
|  |  | GO:0006172~ADP biosynthetic process                               | 3.00E-02 |  |  |
|  |  | GO:0009136~purine nucleoside diphosphate biosynthetic process     | 3.00E-02 |  |  |
|  |  | GO:0002347~response to tumor cell                                 | 3.00E-02 |  |  |
|  |  | GO:0010939~regulation of necrotic cell death                      | 3.00E-02 |  |  |
|  |  | GO:0002036~regulation of L-glutamate transport                    | 3.00E-02 |  |  |
|  |  | GO:0009188~ribonucleoside diphosphate biosynthetic process        | 3.00E-02 |  |  |
|  |  | GO:0070265~necrotic cell death                                    | 3.00E-02 |  |  |
|  |  | GO:0050867~positive regulation of cell activation                 | 3.00E-02 |  |  |
|  |  | GO:0050768~negative regulation of neurogenesis                    | 3.10E-02 |  |  |
|  |  | GO:0046890~regulation of lipid biosynthetic process               | 3.10E-02 |  |  |
|  |  | GO:0051179~localization                                           | 3.10E-02 |  |  |
|  |  | GO:0010033~response to organic substance                          | 3.10E-02 |  |  |
|  |  | GO:0051186~cofactor metabolic process                             | 3.10E-02 |  |  |
|  |  | GO:0031667~response to nutrient levels                            | 3.20E-02 |  |  |
|  |  | GO:0050790~regulation of catalytic activity                       | 3.30E-02 |  |  |
|  |  | GO:0001503~ossification                                           | 3.30E-02 |  |  |
|  |  | GO:0009314~response to radiation                                  | 3.40E-02 |  |  |
|  |  | GO:0010721~negative regulation of cell development                | 3.50E-02 |  |  |
|  |  | GO:0030183~B cell differentiation                                 | 3.50E-02 |  |  |
|  |  | GO:0009152~purine ribonucleotide biosynthetic process             | 3.50E-02 |  |  |

|  |  |                                                                  |          |  |  |
|--|--|------------------------------------------------------------------|----------|--|--|
|  |  | GO:0009896~positive regulation of catabolic process              | 3.60E-02 |  |  |
|  |  | GO:0034220~ion transmembrane transport                           | 3.60E-02 |  |  |
|  |  | GO:0046031~ADP metabolic process                                 | 3.60E-02 |  |  |
|  |  | GO:0051956~negative regulation of amino acid transport           | 3.60E-02 |  |  |
|  |  | GO:0044070~regulation of anion transport                         | 3.60E-02 |  |  |
|  |  | GO:0070201~regulation of establishment of protein localization   | 3.80E-02 |  |  |
|  |  | GO:0060348~bone development                                      | 3.90E-02 |  |  |
|  |  | GO:0006733~oxidoreduction coenzyme metabolic process             | 4.00E-02 |  |  |
|  |  | GO:0009260~ribonucleotide biosynthetic process                   | 4.00E-02 |  |  |
|  |  | GO:0042110~T cell activation                                     | 4.20E-02 |  |  |
|  |  | GO:0009133~nucleoside diphosphate biosynthetic process           | 4.20E-02 |  |  |
|  |  | GO:0006002~fructose 6-phosphate metabolic process                | 4.20E-02 |  |  |
|  |  | GO:0008360~regulation of cell shape                              | 4.30E-02 |  |  |
|  |  | GO:0050671~positive regulation of lymphocyte proliferation       | 4.40E-02 |  |  |
|  |  | GO:0001501~skeletal system development                           | 4.50E-02 |  |  |
|  |  | GO:0032946~positive regulation of mononuclear cell proliferation | 4.60E-02 |  |  |
|  |  | GO:0051783~regulation of nuclear division                        | 4.60E-02 |  |  |
|  |  | GO:0009612~response to mechanical stimulus                       | 4.60E-02 |  |  |
|  |  | GO:0007088~regulation of mitosis                                 | 4.60E-02 |  |  |
|  |  | GO:0070665~positive regulation of leukocyte proliferation        | 4.60E-02 |  |  |
|  |  | GO:0043603~cellular amide metabolic process                      | 4.60E-02 |  |  |
|  |  | GO:0017038~protein import                                        | 4.60E-02 |  |  |

|                   |                                                                                                                                        |                                                                |          |                                    |          |
|-------------------|----------------------------------------------------------------------------------------------------------------------------------------|----------------------------------------------------------------|----------|------------------------------------|----------|
|                   |                                                                                                                                        | GO:0022604~regulation of cell morphogenesis                    | 4.60E-02 |                                    |          |
|                   |                                                                                                                                        | GO:0042221~response to chemical stimulus                       | 4.60E-02 |                                    |          |
|                   |                                                                                                                                        | GO:0034330~cell junction organization                          | 4.70E-02 |                                    |          |
|                   |                                                                                                                                        | GO:0031294~lymphocyte costimulation                            | 4.80E-02 |                                    |          |
|                   |                                                                                                                                        | GO:0031295~T cell costimulation                                | 4.80E-02 |                                    |          |
|                   |                                                                                                                                        | GO:0035313~wound healing, spreading of epidermal cells         | 4.80E-02 |                                    |          |
|                   |                                                                                                                                        | GO:0009179~purine ribonucleoside diphosphate metabolic process | 4.80E-02 |                                    |          |
|                   |                                                                                                                                        | GO:0009135~purine nucleoside diphosphate metabolic process     | 4.80E-02 |                                    |          |
|                   |                                                                                                                                        | GO:0051953~negative regulation of amine transport              | 4.80E-02 |                                    |          |
|                   |                                                                                                                                        | GO:0006734~NADH metabolic process                              | 4.80E-02 |                                    |          |
|                   |                                                                                                                                        | GO:0002252~immune effector process                             | 4.80E-02 |                                    |          |
|                   |                                                                                                                                        | GO:0050776~regulation of immune response                       | 4.90E-02 |                                    |          |
| M <sub>(a2)</sub> | hdac1, dnmt1, ep300, hdac3, mecp2, suv39h1, dnmt3b, jmjd2a, cbx5, sin3a, hdac2, rcor1, ezh2, jmjd3, mbd1, aof2, ptger4, ptger2, dnmt3a | GO:0016568~chromatin modification                              | 1.70E-10 | Cysteine and methionine metabolism | 1.40E-03 |
|                   |                                                                                                                                        | GO:0006325~chromatin organization                              | 2.20E-10 | Huntington's disease               | 2.90E-03 |
|                   |                                                                                                                                        | GO:0016569~covalent chromatin modification                     | 7.60E-10 | Notch signaling pathway            | 7.40E-02 |
|                   |                                                                                                                                        | GO:0051276~chromosome organization                             | 9.00E-10 |                                    |          |
|                   |                                                                                                                                        | GO:0006996~organelle organization                              | 4.30E-07 |                                    |          |
|                   |                                                                                                                                        | GO:0043414~biopolymer methylation                              | 4.20E-06 |                                    |          |
|                   |                                                                                                                                        | GO:0045892~negative regulation of transcription, DNA-dependent | 4.90E-06 |                                    |          |
|                   |                                                                                                                                        | GO:0051253~negative regulation of RNA metabolic process        | 5.10E-06 |                                    |          |
|                   |                                                                                                                                        | GO:0032259~methylation                                         | 7.10E-06 |                                    |          |
|                   |                                                                                                                                        | GO:0050794~regulation of cellular process                      | 8.80E-06 |                                    |          |
|                   |                                                                                                                                        | GO:0016043~cellular                                            | 1.40E-05 |                                    |          |

|                   |                                                                                                                                               |                                                                                                         |          |                                              |          |
|-------------------|-----------------------------------------------------------------------------------------------------------------------------------------------|---------------------------------------------------------------------------------------------------------|----------|----------------------------------------------|----------|
|                   |                                                                                                                                               | component organization                                                                                  |          |                                              |          |
|                   |                                                                                                                                               | GO:0016570~histone modification                                                                         | 1.40E-05 |                                              |          |
|                   |                                                                                                                                               | GO:0016481~negative regulation of transcription                                                         | 1.40E-05 |                                              |          |
|                   |                                                                                                                                               | GO:0050789~regulation of biological process                                                             | 1.60E-05 |                                              |          |
|                   |                                                                                                                                               | GO:0045934~negative regulation of nucleobase, nucleoside, nucleotide and nucleic acid metabolic process | 1.80E-05 |                                              |          |
|                   |                                                                                                                                               | GO:0051172~negative regulation of nitrogen compound metabolic process                                   | 1.90E-05 |                                              |          |
|                   |                                                                                                                                               | GO:0010629~negative regulation of gene expression                                                       | 2.00E-05 |                                              |          |
|                   |                                                                                                                                               | GO:0006305~DNA alkylation                                                                               | 2.10E-05 |                                              |          |
|                   |                                                                                                                                               | GO:0006306~DNA methylation                                                                              | 2.10E-05 |                                              |          |
|                   |                                                                                                                                               | GO:0010558~negative regulation of macromolecule biosynthetic process                                    | 2.80E-05 |                                              |          |
|                   |                                                                                                                                               | GO:0016575~histone deacetylation                                                                        | 2.80E-05 |                                              |          |
|                   |                                                                                                                                               | GO:0006304~DNA modification                                                                             | 2.80E-05 |                                              |          |
|                   |                                                                                                                                               | GO:0031327~negative regulation of cellular biosynthetic process                                         | 3.00E-05 |                                              |          |
|                   |                                                                                                                                               | GO:0006730~one-carbon metabolic process                                                                 | 3.10E-05 |                                              |          |
|                   |                                                                                                                                               | GO:0065007~biological regulation                                                                        | 3.30E-05 |                                              |          |
|                   |                                                                                                                                               | GO:0009890~negative regulation of biosynthetic process                                                  | 3.40E-05 |                                              |          |
|                   |                                                                                                                                               | GO:0045449~regulation of transcription                                                                  | 3.70E-05 |                                              |          |
| M <sub>(a3)</sub> | hspb1, pcsk1, csf1r, socs3, irf6, mmp9, vcam1, gstp1, flt3, lta, crp, lbp, il10, slc10a1, slco2b1, slc22a7, abcb11, abcc2, abcc3, bcr, abcc4, | GO:0042221~response to chemical stimulus                                                                | 3.10E-14 | Metabolism of xenobiotics by cytochrome P450 | 2.10E-10 |
|                   |                                                                                                                                               | GO:0002237~response to molecule of bacterial origin                                                     | 2.20E-12 | Drug metabolism                              | 6.70E-09 |
|                   |                                                                                                                                               | GO:0032496~response to lipopolysaccharide                                                               | 2.00E-11 | Cytokine-cytokine receptor interaction       | 4.20E-05 |
|                   |                                                                                                                                               | GO:0010033~response to organic substance                                                                | 7.70E-11 | Jak-STAT signaling pathway                   | 1.30E-04 |
|                   |                                                                                                                                               | GO:0009605~response to external stimulus                                                                | 1.20E-09 | Pathways in cancer                           | 3.10E-04 |

|                                                                                                                                                                                                                                                                                                                                                                                                                                                                                                                                                                          |                                                                     |          |                             |          |
|--------------------------------------------------------------------------------------------------------------------------------------------------------------------------------------------------------------------------------------------------------------------------------------------------------------------------------------------------------------------------------------------------------------------------------------------------------------------------------------------------------------------------------------------------------------------------|---------------------------------------------------------------------|----------|-----------------------------|----------|
| slco1b1,<br>slco1b3, abcg2,<br>slc22a1, cyp2b6,<br>cyp2d6, uqcrfs1,<br>cyp1a2, cyp2e1,<br>cyp2c19,<br>cyp2c9, fos,<br>ptk2b, jak2,<br>mmp13, tnfa,<br>gc, adam33,<br>timp2, timp3,<br>serpina1,<br>serpina3, mmp1,<br>crlf2, mmp3,<br>ntrk3, ccl7,<br>tyk2, il7r,<br>cyp19a1, sh2b3,<br>mmp2, abl2,<br>cyp1b1, pdgfrb,<br>epor, elf4, il4,<br>nat2, jun, gstm1,<br>gstm3, gsto1,<br>pon1, pon2, avp,<br>ccl2, cxcl10,<br>mmp12, il6,<br>cyp1a1, abl1,<br>tslp, tnfaip3,<br>nfkb1a, egr1,<br>enpp2, hk2,<br>mmp10,<br>gadd45a, wispl1,<br>cebpb, selplg,<br>bcl2a1, vegfa | GO:0009617~response to bacterium                                    | 1.40E-08 | ABC transporters            | 9.10E-04 |
|                                                                                                                                                                                                                                                                                                                                                                                                                                                                                                                                                                          | GO:0017144~drug metabolic process                                   | 2.40E-08 | Retinol metabolism          | 2.00E-03 |
|                                                                                                                                                                                                                                                                                                                                                                                                                                                                                                                                                                          | GO:0030574~collagen catabolic process                               | 8.50E-08 | Linoleic acid metabolism    | 2.60E-03 |
|                                                                                                                                                                                                                                                                                                                                                                                                                                                                                                                                                                          | GO:0048518~positive regulation of biological process                | 1.30E-07 | Bladder cancer              | 8.30E-03 |
|                                                                                                                                                                                                                                                                                                                                                                                                                                                                                                                                                                          | GO:0002376~immune system process                                    | 1.60E-07 | Hematopoietic cell lineage  | 1.00E-02 |
|                                                                                                                                                                                                                                                                                                                                                                                                                                                                                                                                                                          | GO:0048522~positive regulation of cellular process                  | 2.20E-07 | Glutathione metabolism      | 1.30E-02 |
|                                                                                                                                                                                                                                                                                                                                                                                                                                                                                                                                                                          | GO:0048513~organ development                                        | 2.30E-07 | Arachidonic acid metabolism | 1.80E-02 |
|                                                                                                                                                                                                                                                                                                                                                                                                                                                                                                                                                                          | GO:0044243~multicellular organismal catabolic process               | 3.50E-07 |                             |          |
|                                                                                                                                                                                                                                                                                                                                                                                                                                                                                                                                                                          | GO:0014070~response to organic cyclic substance                     | 4.80E-07 |                             |          |
|                                                                                                                                                                                                                                                                                                                                                                                                                                                                                                                                                                          | GO:0032963~collagen metabolic process                               | 5.20E-07 |                             |          |
|                                                                                                                                                                                                                                                                                                                                                                                                                                                                                                                                                                          | GO:0009719~response to endogenous stimulus                          | 5.50E-07 |                             |          |
|                                                                                                                                                                                                                                                                                                                                                                                                                                                                                                                                                                          | GO:0009612~response to mechanical stimulus                          | 8.20E-07 |                             |          |
|                                                                                                                                                                                                                                                                                                                                                                                                                                                                                                                                                                          | GO:0048731~system development                                       | 8.60E-07 |                             |          |
|                                                                                                                                                                                                                                                                                                                                                                                                                                                                                                                                                                          | GO:0051707~response to other organism                               | 8.70E-07 |                             |          |
|                                                                                                                                                                                                                                                                                                                                                                                                                                                                                                                                                                          | GO:0044259~multicellular organismal macromolecule metabolic process | 8.80E-07 |                             |          |
|                                                                                                                                                                                                                                                                                                                                                                                                                                                                                                                                                                          | GO:0009725~response to hormone stimulus                             | 1.30E-06 |                             |          |
|                                                                                                                                                                                                                                                                                                                                                                                                                                                                                                                                                                          | GO:0048545~response to steroid hormone stimulus                     | 1.60E-06 |                             |          |
|                                                                                                                                                                                                                                                                                                                                                                                                                                                                                                                                                                          | GO:0009611~response to wounding                                     | 2.00E-06 |                             |          |
|                                                                                                                                                                                                                                                                                                                                                                                                                                                                                                                                                                          | GO:0009607~response to biotic stimulus                              | 2.10E-06 |                             |          |
|                                                                                                                                                                                                                                                                                                                                                                                                                                                                                                                                                                          | GO:0042127~regulation of cell proliferation                         | 2.20E-06 |                             |          |
|                                                                                                                                                                                                                                                                                                                                                                                                                                                                                                                                                                          | GO:0044236~multicellular organismal metabolic process               | 2.20E-06 |                             |          |
|                                                                                                                                                                                                                                                                                                                                                                                                                                                                                                                                                                          | GO:0048534~hemopoietic or lymphoid organ development                | 2.50E-06 |                             |          |
|                                                                                                                                                                                                                                                                                                                                                                                                                                                                                                                                                                          | GO:0042981~regulation of apoptosis                                  | 2.90E-06 |                             |          |

|  |  |                                                           |          |  |  |
|--|--|-----------------------------------------------------------|----------|--|--|
|  |  | GO:0006916~anti-apoptosis                                 | 2.90E-06 |  |  |
|  |  | GO:0006953~acute-phase response                           | 3.30E-06 |  |  |
|  |  | GO:0043067~regulation of programmed cell death            | 3.30E-06 |  |  |
|  |  | GO:0010941~regulation of cell death                       | 3.50E-06 |  |  |
|  |  | GO:0002520~immune system development                      | 4.30E-06 |  |  |
|  |  | GO:0042493~response to drug                               | 4.30E-06 |  |  |
|  |  | GO:0008284~positive regulation of cell proliferation      | 4.50E-06 |  |  |
|  |  | GO:0048856~anatomical structure development               | 5.30E-06 |  |  |
|  |  | GO:0006950~response to stress                             | 5.90E-06 |  |  |
|  |  | GO:0043066~negative regulation of apoptosis               | 6.00E-06 |  |  |
|  |  | GO:0050896~response to stimulus                           | 6.40E-06 |  |  |
|  |  | GO:0018108~peptidyl-tyrosine phosphorylation              | 6.60E-06 |  |  |
|  |  | GO:0043069~negative regulation of programmed cell death   | 6.90E-06 |  |  |
|  |  | GO:0060548~negative regulation of cell death              | 7.10E-06 |  |  |
|  |  | GO:0051704~multi-organism process                         | 7.50E-06 |  |  |
|  |  | GO:0018212~peptidyl-tyrosine modification                 | 8.20E-06 |  |  |
|  |  | GO:0030097~hemopoiesis                                    | 8.90E-06 |  |  |
|  |  | GO:0032879~regulation of localization                     | 9.90E-06 |  |  |
|  |  | GO:0001666~response to hypoxia                            | 1.20E-05 |  |  |
|  |  | GO:0030335~positive regulation of cell migration          | 1.30E-05 |  |  |
|  |  | GO:0070482~response to oxygen levels                      | 1.70E-05 |  |  |
|  |  | GO:0006954~inflammatory response                          | 1.80E-05 |  |  |
|  |  | GO:0048519~negative regulation of biological process      | 2.10E-05 |  |  |
|  |  | GO:0051239~regulation of multicellular organismal process | 2.20E-05 |  |  |

|  |  |                                                                 |          |  |  |
|--|--|-----------------------------------------------------------------|----------|--|--|
|  |  | GO:0040017~positive regulation of locomotion                    | 2.20E-05 |  |  |
|  |  | GO:0051272~positive regulation of cell motion                   | 2.20E-05 |  |  |
|  |  | GO:0007275~multicellular organismal development                 | 2.70E-05 |  |  |
|  |  | GO:0006935~chemotaxis                                           | 3.90E-05 |  |  |
|  |  | GO:0042330~taxis                                                | 3.90E-05 |  |  |
|  |  | GO:0001775~cell activation                                      | 4.20E-05 |  |  |
|  |  | GO:0030334~regulation of cell migration                         | 5.60E-05 |  |  |
|  |  | GO:0050865~regulation of cell activation                        | 6.90E-05 |  |  |
|  |  | GO:0048583~regulation of response to stimulus                   | 7.50E-05 |  |  |
|  |  | GO:0002682~regulation of immune system process                  | 7.50E-05 |  |  |
|  |  | GO:0007610~behavior                                             | 8.10E-05 |  |  |
|  |  | GO:0032268~regulation of cellular protein metabolic process     | 8.90E-05 |  |  |
|  |  | GO:0034097~response to cytokine stimulus                        | 9.40E-05 |  |  |
|  |  | GO:0002521~leukocyte differentiation                            | 1.10E-04 |  |  |
|  |  | GO:0040012~regulation of locomotion                             | 1.20E-04 |  |  |
|  |  | GO:0050793~regulation of developmental process                  | 1.30E-04 |  |  |
|  |  | GO:0051270~regulation of cell motion                            | 1.30E-04 |  |  |
|  |  | GO:0048523~negative regulation of cellular process              | 1.40E-04 |  |  |
|  |  | GO:0031328~positive regulation of cellular biosynthetic process | 1.50E-04 |  |  |
|  |  | GO:0007167~enzyme linked receptor protein signaling pathway     | 1.60E-04 |  |  |
|  |  | GO:0009891~positive regulation of biosynthetic process          | 1.70E-04 |  |  |
|  |  | GO:0007626~locomotory behavior                                  | 1.90E-04 |  |  |
|  |  | GO:0040011~locomotion                                           | 1.90E-04 |  |  |
|  |  | GO:0032502~developmental process                                | 1.90E-04 |  |  |
|  |  | GO:0002526~acute                                                | 2.60E-04 |  |  |

|  |  |                                                                             |          |  |  |
|--|--|-----------------------------------------------------------------------------|----------|--|--|
|  |  | inflammatory response                                                       |          |  |  |
|  |  | GO:0009628~response to abiotic stimulus                                     | 2.80E-04 |  |  |
|  |  | GO:0009991~response to extracellular stimulus                               | 2.90E-04 |  |  |
|  |  | GO:0051246~regulation of protein metabolic process                          | 3.00E-04 |  |  |
|  |  | GO:0051050~positive regulation of transport                                 | 3.10E-04 |  |  |
|  |  | GO:0007169~transmembrane receptor protein tyrosine kinase signaling pathway | 3.20E-04 |  |  |
|  |  | GO:0051173~positive regulation of nitrogen compound metabolic process       | 3.20E-04 |  |  |
|  |  | GO:0030098~lymphocyte differentiation                                       | 3.30E-04 |  |  |
|  |  | GO:0009404~toxin metabolic process                                          | 3.30E-04 |  |  |
|  |  | GO:0050900~leukocyte migration                                              | 3.30E-04 |  |  |
|  |  | GO:0032501~multicellular organismal process                                 | 3.40E-04 |  |  |
|  |  | GO:0002694~regulation of leukocyte activation                               | 4.00E-04 |  |  |
|  |  | GO:0046677~response to antibiotic                                           | 4.50E-04 |  |  |
|  |  | GO:0002684~positive regulation of immune system process                     | 4.60E-04 |  |  |
|  |  | GO:0050867~positive regulation of cell activation                           | 4.60E-04 |  |  |
|  |  | GO:0001932~regulation of protein amino acid phosphorylation                 | 5.00E-04 |  |  |
|  |  | GO:0045321~leukocyte activation                                             | 5.10E-04 |  |  |
|  |  | GO:0032103~positive regulation of response to external stimulus             | 5.20E-04 |  |  |
|  |  | GO:0051223~regulation of protein transport                                  | 5.20E-04 |  |  |
|  |  | GO:0045595~regulation of cell differentiation                               | 5.40E-04 |  |  |
|  |  | GO:0006955~immune response                                                  | 6.00E-04 |  |  |
|  |  | GO:0051222~positive regulation of protein transport                         | 6.10E-04 |  |  |



|  |                                                                                                         |          |  |  |
|--|---------------------------------------------------------------------------------------------------------|----------|--|--|
|  | GO:0065008~regulation of biological quality                                                             | 6.20E-04 |  |  |
|  | GO:0070201~regulation of establishment of protein localization                                          | 6.90E-04 |  |  |
|  | GO:0009893~positive regulation of metabolic process                                                     | 7.80E-04 |  |  |
|  | GO:0006952~defense response                                                                             | 8.20E-04 |  |  |
|  | GO:0045935~positive regulation of nucleobase, nucleoside, nucleotide and nucleic acid metabolic process | 9.30E-04 |  |  |
|  | GO:0031667~response to nutrient levels                                                                  | 9.90E-04 |  |  |
|  | GO:0046649~lymphocyte activation                                                                        | 1.00E-03 |  |  |
|  | GO:0051099~positive regulation of binding                                                               | 1.10E-03 |  |  |
|  | GO:0051384~response to Glucocorticoid stimulus                                                          | 1.10E-03 |  |  |
|  | GO:0032675~regulation of interleukin-6 production                                                       | 1.20E-03 |  |  |
|  | GO:0032880~regulation of protein localization                                                           | 1.20E-03 |  |  |
|  | GO:0010557~positive regulation of macromolecule biosynthetic process                                    | 1.40E-03 |  |  |
|  | GO:0045944~positive regulation of transcription from RNA polymerase II promoter                         | 1.40E-03 |  |  |
|  | GO:0007259~JAK-STAT cascade                                                                             | 1.50E-03 |  |  |
|  | GO:0060326~cell chemotaxis                                                                              | 1.50E-03 |  |  |
|  | GO:0031960~response to corticosteroid stimulus                                                          | 1.50E-03 |  |  |
|  | GO:0045941~positive regulation of transcription                                                         | 1.50E-03 |  |  |
|  | GO:0031325~positive regulation of cellular metabolic process                                            | 1.60E-03 |  |  |
|  | GO:0051249~regulation of lymphocyte activation                                                          | 1.70E-03 |  |  |
|  | GO:0006928~cell motion                                                                                  | 1.70E-03 |  |  |
|  | GO:0045893~positive regulation of transcription,                                                        | 1.80E-03 |  |  |

|  |  |                                                                    |          |  |  |
|--|--|--------------------------------------------------------------------|----------|--|--|
|  |  | DNA-dependent                                                      |          |  |  |
|  |  | GO:0051254~positive regulation of RNA metabolic process            | 1.90E-03 |  |  |
|  |  | GO:0010628~positive regulation of Gene expression                  | 1.90E-03 |  |  |
|  |  | GO:0051098~regulation of binding                                   | 2.00E-03 |  |  |
|  |  | GO:0050776~regulation of immune response                           | 2.00E-03 |  |  |
|  |  | GO:0015711~organic anion transport                                 | 2.10E-03 |  |  |
|  |  | GO:0030154~cell differentiation                                    | 2.20E-03 |  |  |
|  |  | GO:0032101~regulation of response to external stimulus             | 2.30E-03 |  |  |
|  |  | GO:0010646~regulation of cell communication                        | 2.40E-03 |  |  |
|  |  | GO:0048584~positive regulation of response to stimulus             | 2.50E-03 |  |  |
|  |  | GO:0018193~peptidyl-amino acid modification                        | 2.50E-03 |  |  |
|  |  | GO:0051241~negative regulation of multicellular organismal process | 2.60E-03 |  |  |
|  |  | GO:0002697~regulation of immune effector process                   | 2.80E-03 |  |  |
|  |  | GO:0051090~regulation of transcription factor activity             | 3.00E-03 |  |  |
|  |  | GO:0050864~regulation of B cell activation                         | 3.20E-03 |  |  |
|  |  | GO:0043627~response to estrogen stimulus                           | 3.20E-03 |  |  |
|  |  | GO:0010627~regulation of protein kinase cascade                    | 3.20E-03 |  |  |
|  |  | GO:0002696~positive regulation of leukocyte activation             | 3.40E-03 |  |  |
|  |  | GO:0048869~cellular developmental process                          | 3.60E-03 |  |  |
|  |  | GO:0051047~positive regulation of secretion                        | 3.70E-03 |  |  |
|  |  | GO:0010604~positive regulation of macromolecule metabolic process  | 3.80E-03 |  |  |
|  |  | GO:0042592~homeostatic process                                     | 4.00E-03 |  |  |

|  |  |                                                                                                         |          |  |  |
|--|--|---------------------------------------------------------------------------------------------------------|----------|--|--|
|  |  | GO:0006874~cellular calcium ion homeostasis                                                             | 4.20E-03 |  |  |
|  |  | GO:0043200~response to amino acid stimulus                                                              | 4.30E-03 |  |  |
|  |  | GO:0055074~calcium ion homeostasis                                                                      | 4.70E-03 |  |  |
|  |  | GO:0050863~regulation of T cell activation                                                              | 4.80E-03 |  |  |
|  |  | GO:0008285~negative regulation of cell proliferation                                                    | 5.00E-03 |  |  |
|  |  | GO:0002684~positive regulation of immune system process                                                 | 2.00E-02 |  |  |
|  |  | GO:0050867~positive regulation of cell activation                                                       | 2.00E-02 |  |  |
|  |  | GO:0001932~regulation of protein amino acid phosphorylation                                             | 2.00E-02 |  |  |
|  |  | GO:0045321~leukocyte activation                                                                         | 2.00E-02 |  |  |
|  |  | GO:0032103~positive regulation of response to external stimulus                                         | 2.00E-02 |  |  |
|  |  | GO:0051223~regulation of protein transport                                                              | 2.00E-02 |  |  |
|  |  | GO:0045595~regulation of cell differentiation                                                           | 2.10E-02 |  |  |
|  |  | GO:0006955~immune response                                                                              | 2.20E-02 |  |  |
|  |  | GO:0051222~positive regulation of protein transport                                                     | 2.20E-02 |  |  |
|  |  | GO:0065008~regulation of biological quality                                                             | 2.20E-02 |  |  |
|  |  | GO:0070201~regulation of establishment of protein localization                                          | 2.30E-02 |  |  |
|  |  | GO:0009893~positive regulation of metabolic process                                                     | 2.40E-02 |  |  |
|  |  | GO:0006952~defense response                                                                             | 2.50E-02 |  |  |
|  |  | GO:0045935~positive regulation of nucleobase, nucleoside, nucleotide and nucleic acid metabolic process | 2.50E-02 |  |  |
|  |  | GO:0031667~response to nutrient levels                                                                  | 2.50E-02 |  |  |
|  |  | GO:0046649~lymphocyte                                                                                   | 2.60E-02 |  |  |

|  |  |                                                                                 |          |  |  |
|--|--|---------------------------------------------------------------------------------|----------|--|--|
|  |  | activation                                                                      |          |  |  |
|  |  | GO:0051099~positive regulation of binding                                       | 2.60E-02 |  |  |
|  |  | GO:0051384~response toGlucocorticoid stimulus                                   | 2.70E-02 |  |  |
|  |  | GO:0032675~regulation of interleukin-6 production                               | 2.70E-02 |  |  |
|  |  | GO:0032880~regulation of protein localization                                   | 2.70E-02 |  |  |
|  |  | GO:0010557~positive regulation of macromolecule biosynthetic process            | 2.70E-02 |  |  |
|  |  | GO:0045944~positive regulation of transcription from RNA polymerase II promoter | 2.70E-02 |  |  |
|  |  | GO:0007259~JAK-STAT cascade                                                     | 2.80E-02 |  |  |
|  |  | GO:0060326~cell chemotaxis                                                      | 3.00E-02 |  |  |
|  |  | GO:0031960~response to corticosteroid stimulus                                  | 3.00E-02 |  |  |
|  |  | GO:0045941~positive regulation of transcription                                 | 3.00E-02 |  |  |
|  |  | GO:0031325~positive regulation of cellular metabolic process                    | 3.00E-02 |  |  |
|  |  | GO:0051249~regulation of lymphocyte activation                                  | 3.10E-02 |  |  |
|  |  | GO:0006928~cell motion                                                          | 3.10E-02 |  |  |
|  |  | GO:0045893~positive regulation of transcription, DNA-dependent                  | 3.20E-02 |  |  |
|  |  | GO:0051254~positive regulation of RNA metabolic process                         | 3.20E-02 |  |  |
|  |  | GO:0010628~positive regulation ofGene expression                                | 3.20E-02 |  |  |
|  |  | GO:0051098~regulation of binding                                                | 3.20E-02 |  |  |
|  |  | GO:0050776~regulation of immune response                                        | 3.20E-02 |  |  |
|  |  | GO:0015711~organic anion transport                                              | 3.20E-02 |  |  |
|  |  | GO:0030154~cell differentiation                                                 | 3.30E-02 |  |  |
|  |  | GO:0032101~regulation of response to external stimulus                          | 3.30E-02 |  |  |
|  |  | GO:0010646~regulation of                                                        | 3.30E-02 |  |  |

|  |  |                                                                    |          |  |  |
|--|--|--------------------------------------------------------------------|----------|--|--|
|  |  | cell communication                                                 |          |  |  |
|  |  | GO:0048584~positive regulation of response to stimulus             | 3.40E-02 |  |  |
|  |  | GO:0018193~peptidyl-amino acid modification                        | 3.40E-02 |  |  |
|  |  | GO:0051241~negative regulation of multicellular organismal process | 3.50E-02 |  |  |
|  |  | GO:0002697~regulation of immune effector process                   | 3.50E-02 |  |  |
|  |  | GO:0051090~regulation of transcription factor activity             | 3.50E-02 |  |  |
|  |  | GO:0050864~regulation of B cell activation                         | 3.50E-02 |  |  |
|  |  | GO:0043627~response to estrogen stimulus                           | 3.70E-02 |  |  |
|  |  | GO:0010627~regulation of protein kinase cascade                    | 3.70E-02 |  |  |
|  |  | GO:0002696~positive regulation of leukocyte activation             | 3.70E-02 |  |  |
|  |  | GO:0048869~cellular developmental process                          | 3.80E-02 |  |  |
|  |  | GO:0051047~positive regulation of secretion                        | 3.80E-02 |  |  |
|  |  | GO:0010604~positive regulation of macromolecule metabolic process  | 3.80E-02 |  |  |
|  |  | GO:0042592~homeostatic process                                     | 3.80E-02 |  |  |
|  |  | GO:0006874~cellular calcium ion homeostasis                        | 3.80E-02 |  |  |
|  |  | GO:0043200~response to amino acid stimulus                         | 3.90E-02 |  |  |
|  |  | GO:0055074~calcium ion homeostasis                                 | 3.90E-02 |  |  |
|  |  | GO:0045346~regulation of MHC class II biosynthetic process         | 4.00E-02 |  |  |
|  |  | GO:0042359~vitamin D metabolic process                             | 4.00E-02 |  |  |
|  |  | GO:0006873~cellular ion homeostasis                                | 4.00E-02 |  |  |
|  |  | GO:0001894~tissue homeostasis                                      | 4.00E-02 |  |  |
|  |  | GO:0045471~response to ethanol                                     | 4.10E-02 |  |  |

|                   |                                                                                                 |                                                                             |          |                                       |          |
|-------------------|-------------------------------------------------------------------------------------------------|-----------------------------------------------------------------------------|----------|---------------------------------------|----------|
|                   |                                                                                                 | GO:0051098~regulation of binding                                            | 4.20E-02 |                                       |          |
|                   |                                                                                                 | GO:0055082~cellular chemical homeostasis                                    | 4.20E-02 |                                       |          |
|                   |                                                                                                 | GO:0030217~T cell differentiation                                           | 4.20E-02 |                                       |          |
|                   |                                                                                                 | GO:0033273~response to vitamin                                              | 4.40E-02 |                                       |          |
|                   |                                                                                                 | GO:0048878~chemical homeostasis                                             | 4.40E-02 |                                       |          |
|                   |                                                                                                 | GO:0032094~response to food                                                 | 4.40E-02 |                                       |          |
|                   |                                                                                                 | GO:0035162~embryonic hemopoiesis                                            | 4.40E-02 |                                       |          |
|                   |                                                                                                 | GO:0051222~positive regulation of protein transport                         | 4.50E-02 |                                       |          |
|                   |                                                                                                 | GO:0006800~oxygen and reactive oxygen species metabolic process             | 4.50E-02 |                                       |          |
|                   |                                                                                                 | GO:0007399~nervous system development                                       | 4.50E-02 |                                       |          |
|                   |                                                                                                 | GO:0050730~regulation of peptidyl-tyrosine phosphorylation                  | 4.60E-02 |                                       |          |
|                   |                                                                                                 | GO:0042330~taxis                                                            | 4.70E-02 |                                       |          |
|                   |                                                                                                 | GO:0006935~chemotaxis                                                       | 4.70E-02 |                                       |          |
|                   |                                                                                                 | GO:0043388~positive regulation of DNA binding                               | 4.80E-02 |                                       |          |
|                   |                                                                                                 | GO:0080134~regulation of response to stress                                 | 4.90E-02 |                                       |          |
|                   |                                                                                                 | GO:0007626~locomotory behavior                                              | 4.90E-02 |                                       |          |
|                   |                                                                                                 | GO:0009888~tissue development                                               | 4.90E-02 |                                       |          |
|                   |                                                                                                 | GO:0042523~positive regulation of tyrosine phosphorylation of Stat5 protein | 4.90E-02 |                                       |          |
|                   |                                                                                                 | GO:0048535~lymph node development                                           | 4.90E-02 |                                       |          |
|                   |                                                                                                 | GO:0015721~bile acid and bile salt transport                                | 4.90E-02 |                                       |          |
| M <sub>(a4)</sub> | ptk2, enpp2, pik3ca, mmp13, mapk8, mapk14, cxcl10, gpx4, gpx1, sepn1, ephb2, sepw1, ccl7, elf4, | GO:0042221~response to chemical stimulus                                    | 1.90E-15 | NOD-like receptor signaling pathway   | 4.20E-07 |
|                   |                                                                                                 | GO:0040011~locomotion                                                       | 1.40E-13 | Toll-like receptor signaling pathway  | 4.90E-06 |
|                   |                                                                                                 | GO:0006928~cell motion                                                      | 1.50E-12 | RIG-I-like receptor signaling pathway | 8.50E-04 |
|                   |                                                                                                 | GO:0032494~response to                                                      | 4.10E-12 | Chemokine signaling pathway           | 1.30E-03 |

|                                                   |                                                           |          |                                                            |          |
|---------------------------------------------------|-----------------------------------------------------------|----------|------------------------------------------------------------|----------|
| pcsk1, il6,<br>vcam1, nfkb1a,<br>uqcrfs1, tnfaip3 | peptidoglycan                                             |          |                                                            |          |
|                                                   | GO:0042330~taxis                                          | 4.80E-12 | Leukocyte transendothelial migration                       | 3.70E-03 |
|                                                   | GO:0006935~chemotaxis                                     | 7.40E-12 | Neurotrophin signaling pathway                             | 4.20E-03 |
|                                                   | GO:0043066~negative regulation of apoptosis               | 1.10E-11 | Cytosolic DNA-sensing pathway                              | 9.60E-03 |
|                                                   | GO:0043069~negative regulation of programmed cell death   | 4.20E-09 | Pathways in cancer                                         | 1.00E-02 |
|                                                   | GO:0060548~negative regulation of cell death              | 5.00E-09 | Epithelial cell signaling in Helicobacter pylori infection | 1.40E-02 |
|                                                   | GO:0009605~response to external stimulus                  | 5.10E-09 | VEGF signaling pathway                                     | 1.70E-02 |
|                                                   | GO:0009617~response to bacterium                          | 5.40E-09 | Fc epsilon RI signaling pathway                            | 1.90E-02 |
|                                                   | GO:0002237~response to molecule of bacterial origin       | 7.00E-09 | Small cell lung cancer                                     | 2.20E-02 |
|                                                   | GO:0048522~positive regulation of cellular process        | 8.90E-09 | Progesterone-mediated oocyte maturation                    | 2.30E-02 |
|                                                   | GO:0010033~response to organic substance                  | 1.50E-08 | ErbB signaling pathway                                     | 2.30E-02 |
|                                                   | GO:0050896~response to stimulus                           | 1.60E-08 | T cell receptor signaling pathway                          | 3.40E-02 |
|                                                   | GO:0007610~behavior                                       | 1.80E-08 |                                                            |          |
|                                                   | GO:0007626~locomotory behavior                            | 3.60E-08 |                                                            |          |
|                                                   | GO:0048518~positive regulation of biological process      | 4.30E-08 |                                                            |          |
|                                                   | GO:0051707~response to other organism                     | 4.70E-08 |                                                            |          |
|                                                   | GO:0006950~response to stress                             | 4.80E-08 |                                                            |          |
|                                                   | GO:0050789~regulation of biological process               | 5.50E-08 |                                                            |          |
|                                                   | GO:0048513~organ development                              | 7.00E-08 |                                                            |          |
|                                                   | GO:0031347~regulation of defense response                 | 8.00E-08 |                                                            |          |
|                                                   | GO:0051239~regulation of multicellular organismal process | 8.80E-08 |                                                            |          |
|                                                   | GO:0007275~multicellular organismal development           | 8.80E-08 |                                                            |          |
|                                                   | GO:0009725~response to hormone stimulus                   | 8.80E-08 |                                                            |          |
|                                                   | GO:0048731~system                                         | 9.30E-08 |                                                            |          |

|  |  |                                                    |          |  |  |
|--|--|----------------------------------------------------|----------|--|--|
|  |  | development                                        |          |  |  |
|  |  | GO:0002376~immune system process                   | 1.30E-07 |  |  |
|  |  | GO:0009607~response to biotic stimulus             | 1.60E-07 |  |  |
|  |  | GO:0002682~regulation of immune system process     | 2.00E-07 |  |  |
|  |  | GO:0050793~regulation of developmental process     | 2.70E-07 |  |  |
|  |  | GO:0051704~multi-organism process                  | 2.70E-07 |  |  |
|  |  | GO:0065008~regulation of biological quality        | 2.80E-07 |  |  |
|  |  | GO:0009719~response to endogenous stimulus         | 3.60E-07 |  |  |
|  |  | GO:0065007~biological regulation                   | 4.20E-07 |  |  |
|  |  | GO:0048545~response to steroid hormone stimulus    | 5.40E-07 |  |  |
|  |  | GO:0048856~anatomical structure development        | 6.00E-07 |  |  |
|  |  | GO:0006518~peptide metabolic process               | 9.60E-07 |  |  |
|  |  | GO:0010035~response to inorganic substance         | 9.70E-07 |  |  |
|  |  | GO:0006916~anti-apoptosis                          | 1.30E-06 |  |  |
|  |  | GO:0032502~developmental process                   | 1.50E-06 |  |  |
|  |  | GO:0050794~regulation of cellular process          | 2.20E-06 |  |  |
|  |  | GO:0042981~regulation of apoptosis                 | 2.50E-06 |  |  |
|  |  | GO:0043067~regulation of programmed cell death     | 3.20E-06 |  |  |
|  |  | GO:0010941~regulation of cell death                | 3.50E-06 |  |  |
|  |  | GO:0048523~negative regulation of cellular process | 4.90E-06 |  |  |
|  |  | GO:0045595~regulation of cell differentiation      | 5.60E-06 |  |  |
|  |  | GO:0009611~response to wounding                    | 6.60E-06 |  |  |
|  |  | GO:0050727~regulation of inflammatory response     | 8.10E-06 |  |  |
|  |  | GO:0032496~response to lipopolysaccharide          | 8.10E-06 |  |  |
|  |  | GO:0080134~regulation of response to stress        | 9.40E-06 |  |  |



|  |  |                                                                                 |          |  |  |
|--|--|---------------------------------------------------------------------------------|----------|--|--|
|  |  | GO:0016477~cell migration                                                       | 9.40E-06 |  |  |
|  |  | GO:0048519~negative regulation of biological process                            | 1.20E-05 |  |  |
|  |  | GO:0032495~response to muramyl dipeptide                                        | 1.30E-05 |  |  |
|  |  | GO:0007267~cell-cell signaling                                                  | 1.40E-05 |  |  |
|  |  | GO:0006793~phosphorus metabolic process                                         | 1.80E-05 |  |  |
|  |  | GO:0006796~phosphate metabolic process                                          | 1.80E-05 |  |  |
|  |  | GO:0006915~apoptosis                                                            | 2.50E-05 |  |  |
|  |  | GO:0032879~regulation of localization                                           | 2.80E-05 |  |  |
|  |  | GO:0051674~localization of cell                                                 | 3.10E-05 |  |  |
|  |  | GO:0048870~cell motility                                                        | 3.50E-05 |  |  |
|  |  | GO:0012501~programmed cell death                                                | 3.60E-05 |  |  |
|  |  | GO:0006468~protein amino acid phosphorylation                                   | 3.70E-05 |  |  |
|  |  | GO:0051223~regulation of protein transport                                      | 4.10E-05 |  |  |
|  |  | GO:0070201~regulation of establishment of protein localization                  | 4.50E-05 |  |  |
|  |  | GO:0007243~protein kinase cascade                                               | 4.60E-05 |  |  |
|  |  | GO:0045944~positive regulation of transcription from RNA polymerase II promoter | 4.70E-05 |  |  |
|  |  | GO:0010038~response to metal ion                                                | 4.90E-05 |  |  |
|  |  | GO:0008219~cell death                                                           | 5.30E-05 |  |  |
|  |  | GO:0016265~death                                                                | 5.90E-05 |  |  |
|  |  | GO:0030154~cell differentiation                                                 | 6.20E-05 |  |  |
|  |  | GO:0032880~regulation of protein localization                                   | 6.50E-05 |  |  |
|  |  | GO:0043687~post-translational protein modification                              | 8.00E-05 |  |  |
|  |  | GO:0031663~lipopolysaccharide-mediated signaling pathway                        | 8.30E-05 |  |  |
|  |  | GO:0001525~angiogenesis                                                         | 8.80E-05 |  |  |
|  |  | GO:0042127~regulation of cell proliferation                                     | 9.20E-05 |  |  |

|  |  |                                                                |          |  |  |
|--|--|----------------------------------------------------------------|----------|--|--|
|  |  | GO:0048869~cellular developmental process                      | 1.10E-04 |  |  |
|  |  | GO:0019538~protein metabolic process                           | 1.20E-04 |  |  |
|  |  | GO:0007154~cell communication                                  | 1.50E-04 |  |  |
|  |  | GO:0016310~phosphorylation                                     | 1.50E-04 |  |  |
|  |  | GO:0032101~regulation of response to external stimulus         | 1.60E-04 |  |  |
|  |  | GO:0006629~lipid metabolic process                             | 1.70E-04 |  |  |
|  |  | GO:0051716~cellular response to stimulus                       | 1.80E-04 |  |  |
|  |  | GO:0021955~central nervous system neuron axonogenesis          | 1.90E-04 |  |  |
|  |  | GO:0030334~regulation of cell migration                        | 2.00E-04 |  |  |
|  |  | GO:0048583~regulation of response to stimulus                  | 2.10E-04 |  |  |
|  |  | GO:0045893~positive regulation of transcription, DNA-dependent | 2.10E-04 |  |  |
|  |  | GO:0042744~hydrogen peroxide catabolic process                 | 2.20E-04 |  |  |
|  |  | GO:0051254~positive regulation of RNA metabolic process        | 2.20E-04 |  |  |
|  |  | GO:0032501~multicellular organismal process                    | 2.40E-04 |  |  |
|  |  | GO:0070301~cellular response to hydrogen peroxide              | 2.40E-04 |  |  |
|  |  | GO:0040012~regulation of locomotion                            | 2.40E-04 |  |  |
|  |  | GO:0051270~regulation of cell motion                           | 2.60E-04 |  |  |
|  |  | GO:0044255~cellular lipid metabolic process                    | 2.90E-04 |  |  |
|  |  | GO:0043542~endothelial cell migration                          | 3.00E-04 |  |  |
|  |  | GO:0048514~blood vessel morphogenesis                          | 3.30E-04 |  |  |
|  |  | GO:0045596~negative regulation of cell differentiation         | 3.80E-04 |  |  |
|  |  | GO:0022603~regulation of anatomical structure morphogenesis    | 4.10E-04 |  |  |
|  |  | GO:0006464~protein                                             | 4.20E-04 |  |  |

|  |  |                                                                |          |  |  |
|--|--|----------------------------------------------------------------|----------|--|--|
|  |  | modification process                                           |          |  |  |
|  |  | GO:0050771~negative regulation of axonogenesis                 | 4.30E-04 |  |  |
|  |  | GO:0042743~hydrogen peroxide metabolic process                 | 4.40E-04 |  |  |
|  |  | GO:0051050~positive regulation of transport                    | 4.40E-04 |  |  |
|  |  | GO:0050776~regulation of immune response                       | 4.40E-04 |  |  |
|  |  | GO:0045941~positive regulation of transcription                | 4.60E-04 |  |  |
|  |  | GO:0033554~cellular response to stress                         | 4.60E-04 |  |  |
|  |  | GO:0045597~positive regulation of cell differentiation         | 4.60E-04 |  |  |
|  |  | GO:0031345~negative regulation of cell projection organization | 4.70E-04 |  |  |
|  |  | GO:0006749~glutathione metabolic process                       | 4.80E-04 |  |  |
|  |  | GO:0010628~positive regulation of gene expression              | 5.00E-04 |  |  |
|  |  | GO:0002684~positive regulation of immune system process        | 5.30E-04 |  |  |
|  |  | GO:0009987~cellular process                                    | 5.50E-04 |  |  |
|  |  | GO:0034614~cellular response to reactive oxygen species        | 5.80E-04 |  |  |
|  |  | GO:0043412~biopolymer modification                             | 5.90E-04 |  |  |
|  |  | GO:0001568~blood vessel development                            | 6.10E-04 |  |  |
|  |  | GO:0010646~regulation of cell communication                    | 7.30E-04 |  |  |
|  |  | GO:0022008~neurogenesis                                        | 7.40E-04 |  |  |
|  |  | GO:0060341~regulation of cellular localization                 | 8.80E-04 |  |  |
|  |  | GO:0010627~regulation of protein kinase cascade                | 8.90E-04 |  |  |
|  |  | GO:0001944~vasculature development                             | 9.70E-04 |  |  |
|  |  | GO:0021954~central nervous system neuron development           | 9.70E-04 |  |  |
|  |  | GO:0031175~neuron projection development                       | 9.90E-04 |  |  |
|  |  | GO:0051093~negative regulation of developmental                | 1.10E-03 |  |  |

|                   |                                                                                                                                                                                                                                                                                                                                                                                             |                                                                                                         |          |                                           |          |
|-------------------|---------------------------------------------------------------------------------------------------------------------------------------------------------------------------------------------------------------------------------------------------------------------------------------------------------------------------------------------------------------------------------------------|---------------------------------------------------------------------------------------------------------|----------|-------------------------------------------|----------|
|                   |                                                                                                                                                                                                                                                                                                                                                                                             | process                                                                                                 |          |                                           |          |
|                   |                                                                                                                                                                                                                                                                                                                                                                                             | GO:0045935~positive regulation of nucleobase, nucleoside, nucleotide and nucleic acid metabolic process | 1.10E-03 |                                           |          |
|                   |                                                                                                                                                                                                                                                                                                                                                                                             | GO:0031016~pancreas development                                                                         | 1.10E-03 |                                           |          |
|                   |                                                                                                                                                                                                                                                                                                                                                                                             | GO:0051173~positive regulation of nitrogen compound metabolic process                                   | 1.10E-03 |                                           |          |
|                   |                                                                                                                                                                                                                                                                                                                                                                                             | GO:0048468~cell development                                                                             | 1.20E-03 |                                           |          |
|                   |                                                                                                                                                                                                                                                                                                                                                                                             | GO:0051094~positive regulation of developmental process                                                 | 1.20E-03 |                                           |          |
|                   |                                                                                                                                                                                                                                                                                                                                                                                             | GO:0010557~positive regulation of macromolecule biosynthetic process                                    | 1.30E-03 |                                           |          |
|                   |                                                                                                                                                                                                                                                                                                                                                                                             | GO:0042102~positive regulation of T cell proliferation                                                  | 1.30E-03 |                                           |          |
| M <sub>(a5)</sub> | actin, itgb3, klf4, tnfrsf10b, csf3r, csf3, eef1b3, ddit3, nfe2l1, etv4, tbx5, tbx6, tnfsf13, hla-e, myf5, tnnt2, krt8, kdr, nkx2-5, krt7, pax7, tgfb, krt19, plau, ncam1, ervk2, cdkn2a, msmb, apba1, ptgs2, mlh1, dapk1, apba2, brca1, xiap, rassf1, cd40, f2r, src, cftr, bax, ccl18, abcb1, egfr, gata1, cux1, il17ra, mark2, cd14, cyp24a1, pou2f1, slc22a3, slc1a1, plat, tap2, thbd, | GO:0050896~response to stimulus                                                                         | 1.90E-15 | Cytokine-cytokine receptor interaction    | 6.40E-06 |
|                   |                                                                                                                                                                                                                                                                                                                                                                                             | GO:0019882~antigen processing and presentation                                                          | 1.40E-13 | Pathways in cancer                        | 7.10E-05 |
|                   |                                                                                                                                                                                                                                                                                                                                                                                             | GO:0002376~immune system process                                                                        | 1.50E-12 | Bladder cancer                            | 1.10E-04 |
|                   |                                                                                                                                                                                                                                                                                                                                                                                             | GO:0042221~response to chemical stimulus                                                                | 4.10E-12 | Antigen processing and presentation       | 3.60E-04 |
|                   |                                                                                                                                                                                                                                                                                                                                                                                             | GO:0006955~immune response                                                                              | 4.80E-12 | Hematopoietic cell lineage                | 4.30E-04 |
|                   |                                                                                                                                                                                                                                                                                                                                                                                             | GO:0009605~response to external stimulus                                                                | 7.40E-12 | Complement and coagulation cascades       | 1.10E-03 |
|                   |                                                                                                                                                                                                                                                                                                                                                                                             | GO:0006950~response to stress                                                                           | 1.10E-11 | ABC transporters                          | 1.60E-03 |
|                   |                                                                                                                                                                                                                                                                                                                                                                                             | GO:0042981~regulation of apoptosis                                                                      | 4.20E-09 | Natural killer cell mediated cytotoxicity | 4.10E-03 |
|                   |                                                                                                                                                                                                                                                                                                                                                                                             | GO:0043067~regulation of programmed cell death                                                          | 5.00E-09 | Allograft rejection                       | 8.10E-03 |
|                   |                                                                                                                                                                                                                                                                                                                                                                                             | GO:0009611~response to wounding                                                                         | 5.10E-09 | Pancreatic cancer                         | 9.40E-03 |
|                   |                                                                                                                                                                                                                                                                                                                                                                                             | GO:0010941~regulation of cell death                                                                     | 5.40E-09 | Cell adhesion molecules (CAMs)            | 1.80E-02 |
|                   |                                                                                                                                                                                                                                                                                                                                                                                             | GO:0032502~developmental process                                                                        | 7.00E-09 |                                           |          |
|                   |                                                                                                                                                                                                                                                                                                                                                                                             | GO:0048518~positive regulation of biological process                                                    | 8.90E-09 |                                           |          |

|                                                                                                                                                                                                                                                                                                                        |                                                         |          |  |  |
|------------------------------------------------------------------------------------------------------------------------------------------------------------------------------------------------------------------------------------------------------------------------------------------------------------------------|---------------------------------------------------------|----------|--|--|
| procr, smad3,<br>bcl2l1, cd1b,<br>krt16, mki67,<br>ccl22, cd1c,<br>gata3, ccl26,<br>hla-b, psmb9,<br>b2m, ccl17,<br>ppa1, tap1,<br>psmb8, nos2,<br>ulbp3, ulbp2,<br>diablo, plaur,<br>cd34, col9a1,<br>ifng, tapbp, th11,<br>nanog, pou5f1,<br>nfat5, abcb6, f2,<br>cldn7, atp8a2,<br>tymp, stat1, il8,<br>mmp7, hspa5 | GO:0009653~anatomical structure morphogenesis           | 1.50E-08 |  |  |
|                                                                                                                                                                                                                                                                                                                        | GO:0042127~regulation of cell proliferation             | 1.60E-08 |  |  |
|                                                                                                                                                                                                                                                                                                                        | GO:0048856~anatomical structure development             | 1.80E-08 |  |  |
|                                                                                                                                                                                                                                                                                                                        | GO:0043281~regulation of caspase activity               | 3.60E-08 |  |  |
|                                                                                                                                                                                                                                                                                                                        | GO:0051704~multi-organism process                       | 4.30E-08 |  |  |
|                                                                                                                                                                                                                                                                                                                        | GO:0006919~activation of caspase activity               | 4.70E-08 |  |  |
|                                                                                                                                                                                                                                                                                                                        | GO:0052548~regulation of endopeptidase activity         | 4.80E-08 |  |  |
|                                                                                                                                                                                                                                                                                                                        | GO:0007275~multicellular organismal development         | 5.50E-08 |  |  |
|                                                                                                                                                                                                                                                                                                                        | GO:0052547~regulation of peptidase activity             | 7.00E-08 |  |  |
|                                                                                                                                                                                                                                                                                                                        | GO:0043065~positive regulation of apoptosis             | 8.00E-08 |  |  |
|                                                                                                                                                                                                                                                                                                                        | GO:0043068~positive regulation of programmed cell death | 8.80E-08 |  |  |
|                                                                                                                                                                                                                                                                                                                        | GO:0010952~positive regulation of peptidase activity    | 8.80E-08 |  |  |
|                                                                                                                                                                                                                                                                                                                        | GO:0043280~positive regulation of caspase activity      | 8.80E-08 |  |  |
|                                                                                                                                                                                                                                                                                                                        | GO:0010942~positive regulation of cell death            | 9.30E-08 |  |  |
|                                                                                                                                                                                                                                                                                                                        | GO:0009607~response to biotic stimulus                  | 1.30E-07 |  |  |
|                                                                                                                                                                                                                                                                                                                        | GO:0048513~organ development                            | 1.60E-07 |  |  |
|                                                                                                                                                                                                                                                                                                                        | GO:0051345~positive regulation of hydrolase activity    | 2.00E-07 |  |  |
|                                                                                                                                                                                                                                                                                                                        | GO:0050817~coagulation                                  | 2.70E-07 |  |  |
|                                                                                                                                                                                                                                                                                                                        | GO:0007596~blood coagulation                            | 2.70E-07 |  |  |
|                                                                                                                                                                                                                                                                                                                        | GO:0006952~defense response                             | 2.80E-07 |  |  |
|                                                                                                                                                                                                                                                                                                                        | GO:0042060~wound healing                                | 3.60E-07 |  |  |
|                                                                                                                                                                                                                                                                                                                        | GO:0007599~hemostasis                                   | 4.20E-07 |  |  |
|                                                                                                                                                                                                                                                                                                                        | GO:0040011~locomotion                                   | 5.40E-07 |  |  |
|                                                                                                                                                                                                                                                                                                                        | GO:0048522~positive regulation of cellular process      | 6.00E-07 |  |  |
|                                                                                                                                                                                                                                                                                                                        | GO:0048731~system development                           | 9.60E-07 |  |  |
|                                                                                                                                                                                                                                                                                                                        | GO:0065007~biological                                   | 9.70E-07 |  |  |

|  |  |                                                                                   |          |  |  |
|--|--|-----------------------------------------------------------------------------------|----------|--|--|
|  |  | regulation                                                                        |          |  |  |
|  |  | GO:0048583~regulation of response to stimulus                                     | 1.30E-06 |  |  |
|  |  | GO:0032501~multicellular organismal process                                       | 1.50E-06 |  |  |
|  |  | GO:0051707~response to other organism                                             | 2.20E-06 |  |  |
|  |  | GO:0010033~response to organic substance                                          | 2.50E-06 |  |  |
|  |  | GO:0050878~regulation of body fluid levels                                        | 3.20E-06 |  |  |
|  |  | GO:0002474~antigen processing and presentation of peptide antigen via MHC class I | 3.50E-06 |  |  |
|  |  | GO:0007260~tyrosine phosphorylation of STAT protein                               | 4.90E-06 |  |  |
|  |  | GO:0006915~apoptosis                                                              | 5.60E-06 |  |  |
|  |  | GO:0012501~programmed cell death                                                  | 6.60E-06 |  |  |
|  |  | GO:0006935~chemotaxis                                                             | 8.10E-06 |  |  |
|  |  | GO:0042330~taxis                                                                  | 8.10E-06 |  |  |
|  |  | GO:0007626~locomotory behavior                                                    | 9.40E-06 |  |  |
|  |  | GO:0051336~regulation of hydrolase activity                                       | 9.40E-06 |  |  |
|  |  | GO:0044419~interspecies interaction between organisms                             | 1.20E-05 |  |  |
|  |  | GO:0009790~embryonic development                                                  | 1.30E-05 |  |  |
|  |  | GO:0048646~anatomical structure formation involved in morphogenesis               | 1.40E-05 |  |  |
|  |  | GO:0002237~response to molecule of bacterial origin                               | 1.80E-05 |  |  |
|  |  | GO:0009888~tissue development                                                     | 1.80E-05 |  |  |
|  |  | GO:0051240~positive regulation of multicellular organismal process                | 2.50E-05 |  |  |
|  |  | GO:0048002~antigen processing and presentation of peptide antigen                 | 2.80E-05 |  |  |
|  |  | GO:0009617~response to bacterium                                                  | 3.10E-05 |  |  |
|  |  | GO:0031325~positive regulation of cellular                                        | 3.50E-05 |  |  |

|  |  |                                                                                                         |          |  |  |
|--|--|---------------------------------------------------------------------------------------------------------|----------|--|--|
|  |  | metabolic process                                                                                       |          |  |  |
|  |  | GO:0006917~induction of apoptosis                                                                       | 3.60E-05 |  |  |
|  |  | GO:0012502~induction of programmed cell death                                                           | 3.70E-05 |  |  |
|  |  | GO:0048519~negative regulation of biological process                                                    | 4.10E-05 |  |  |
|  |  | GO:0008219~cell death                                                                                   | 4.50E-05 |  |  |
|  |  | GO:0006928~cell motion                                                                                  | 4.60E-05 |  |  |
|  |  | GO:0050789~regulation of biological process                                                             | 4.70E-05 |  |  |
|  |  | GO:0016265~death                                                                                        | 4.90E-05 |  |  |
|  |  | GO:0051173~positive regulation of nitrogen compound metabolic process                                   | 5.30E-05 |  |  |
|  |  | GO:0048514~blood vessel morphogenesis                                                                   | 5.90E-05 |  |  |
|  |  | GO:0009893~positive regulation of metabolic process                                                     | 6.20E-05 |  |  |
|  |  | GO:0016477~cell migration                                                                               | 6.50E-05 |  |  |
|  |  | GO:0048523~negative regulation of cellular process                                                      | 8.00E-05 |  |  |
|  |  | GO:0044093~positive regulation of molecular function                                                    | 8.30E-05 |  |  |
|  |  | GO:0001775~cell activation                                                                              | 8.80E-05 |  |  |
|  |  | GO:0010604~positive regulation of macromolecule metabolic process                                       | 9.20E-05 |  |  |
|  |  | GO:0043085~positive regulation of catalytic activity                                                    | 1.10E-04 |  |  |
|  |  | GO:0032879~regulation of localization                                                                   | 1.20E-04 |  |  |
|  |  | GO:0051674~localization of cell                                                                         | 1.50E-04 |  |  |
|  |  | GO:0048870~cell motility                                                                                | 1.50E-04 |  |  |
|  |  | GO:0045935~positive regulation of nucleobase, nucleoside, nucleotide and nucleic acid metabolic process | 1.60E-04 |  |  |
|  |  | GO:0001568~blood vessel development                                                                     | 1.70E-04 |  |  |
|  |  | GO:0030154~cell differentiation                                                                         | 1.80E-04 |  |  |
|  |  | GO:0007610~behavior                                                                                     | 1.90E-04 |  |  |
|  |  | GO:0001944~vasculature                                                                                  | 2.00E-04 |  |  |

|  |  |                                                                                                                                                    |          |  |  |
|--|--|----------------------------------------------------------------------------------------------------------------------------------------------------|----------|--|--|
|  |  | development                                                                                                                                        |          |  |  |
|  |  | GO:0018108~peptidyl-tyrosine phosphorylation                                                                                                       | 2.10E-04 |  |  |
|  |  | GO:0048660~regulation of smooth muscle cell proliferation                                                                                          | 2.10E-04 |  |  |
|  |  | GO:0006954~inflammatory response                                                                                                                   | 2.20E-04 |  |  |
|  |  | GO:0009987~cellular process                                                                                                                        | 2.20E-04 |  |  |
|  |  | GO:0022402~cell cycle process                                                                                                                      | 2.40E-04 |  |  |
|  |  | GO:0060255~regulation of macromolecule metabolic process                                                                                           | 2.40E-04 |  |  |
|  |  | GO:0018212~peptidyl-tyrosine modification                                                                                                          | 2.40E-04 |  |  |
|  |  | GO:0051239~regulation of multicellular organismal process                                                                                          | 2.60E-04 |  |  |
|  |  | GO:0065008~regulation of biological quality                                                                                                        | 2.90E-04 |  |  |
|  |  | GO:0008284~positive regulation of cell proliferation                                                                                               | 3.00E-04 |  |  |
|  |  | GO:0048869~cellular developmental process                                                                                                          | 3.30E-04 |  |  |
|  |  | GO:0002706~regulation of lymphocyte mediated immunity                                                                                              | 3.80E-04 |  |  |
|  |  | GO:0002822~regulation of adaptive immune response based on somatic recombination of immune receptors built from immunoglobulin superfamily domains | 4.10E-04 |  |  |
|  |  | GO:0043066~negative regulation of apoptosis                                                                                                        | 4.20E-04 |  |  |
|  |  | GO:0019222~regulation of metabolic process                                                                                                         | 4.30E-04 |  |  |
|  |  | GO:0002819~regulation of adaptive immune response                                                                                                  | 4.40E-04 |  |  |
|  |  | GO:0051049~regulation of transport                                                                                                                 | 4.40E-04 |  |  |
|  |  | GO:0009891~positive regulation of biosynthetic process                                                                                             | 4.40E-04 |  |  |
|  |  | GO:0031343~positive regulation of cell killing                                                                                                     | 4.60E-04 |  |  |



|  |  |                                                                      |          |  |  |
|--|--|----------------------------------------------------------------------|----------|--|--|
|  |  | GO:0002697~regulation of immune effector process                     | 4.60E-04 |  |  |
|  |  | GO:0043069~negative regulation of programmed cell death              | 4.60E-04 |  |  |
|  |  | GO:0060548~negative regulation of cell death                         | 4.70E-04 |  |  |
|  |  | GO:0008285~negative regulation of cell proliferation                 | 4.80E-04 |  |  |
|  |  | GO:0007050~cell cycle arrest                                         | 5.00E-04 |  |  |
|  |  | GO:0032101~regulation of response to external stimulus               | 5.30E-04 |  |  |
|  |  | GO:0043627~response to estrogen stimulus                             | 5.50E-04 |  |  |
|  |  | GO:0007243~protein kinase cascade                                    | 5.80E-04 |  |  |
|  |  | GO:0000018~regulation of DNA recombination                           | 5.90E-04 |  |  |
|  |  | GO:0002703~regulation of leukocyte mediated immunity                 | 6.10E-04 |  |  |
|  |  | GO:0031341~regulation of cell killing                                | 7.30E-04 |  |  |
|  |  | GO:0010605~negative regulation of macromolecule metabolic process    | 7.40E-04 |  |  |
|  |  | GO:0010557~positive regulation of macromolecule biosynthetic process | 8.80E-04 |  |  |
|  |  | GO:0045941~positive regulation of transcription                      | 8.90E-04 |  |  |
|  |  | GO:0014706~striated muscle tissue development                        | 9.70E-04 |  |  |
|  |  | GO:0051924~regulation of calcium ion transport                       | 9.70E-04 |  |  |
|  |  | GO:0008637~apoptotic mitochondrial changes                           | 9.90E-04 |  |  |
|  |  | GO:0009719~response to endogenous stimulus                           | 1.10E-03 |  |  |
|  |  | GO:0040007~growth                                                    | 1.10E-03 |  |  |
|  |  | GO:0065009~regulation of molecular function                          | 1.10E-03 |  |  |
|  |  | GO:0010628~positive regulation of gene expression                    | 1.10E-03 |  |  |
|  |  | GO:0051928~positive regulation of calcium ion transport              | 1.20E-03 |  |  |
|  |  | GO:0060537~muscle tissue development                                 | 1.20E-03 |  |  |

|  |  |                                                                             |          |  |  |
|--|--|-----------------------------------------------------------------------------|----------|--|--|
|  |  | GO:0009892~negative regulation of metabolic process                         | 1.30E-03 |  |  |
|  |  | GO:0031328~positive regulation of cellular biosynthetic process             | 1.30E-03 |  |  |
|  |  | GO:0045830~positive regulation of isotype switching                         | 1.40E-03 |  |  |
|  |  | GO:0045911~positive regulation of DNA recombination                         | 1.40E-03 |  |  |
|  |  | GO:0048545~response to steroid hormone stimulus                             | 1.40E-03 |  |  |
|  |  | GO:0040012~regulation of locomotion                                         | 1.40E-03 |  |  |
|  |  | GO:0050794~regulation of cellular process                                   | 1.40E-03 |  |  |
|  |  | GO:0032496~response to lipopolysaccharide                                   | 1.50E-03 |  |  |
|  |  | GO:0031667~response to nutrient levels                                      | 1.60E-03 |  |  |
|  |  | GO:0043403~skeletal muscle regeneration                                     | 1.70E-03 |  |  |
|  |  | GO:0010959~regulation of metal ion transport                                | 1.80E-03 |  |  |
|  |  | GO:0007259~JAK-STAT cascade                                                 | 1.90E-03 |  |  |
|  |  | GO:0031324~negative regulation of cellular metabolic process                | 2.00E-03 |  |  |
|  |  | GO:0006916~anti-apoptosis                                                   | 2.00E-03 |  |  |
|  |  | GO:0002478~antigen processing and presentation of exogenous peptide antigen | 2.10E-03 |  |  |
|  |  | GO:0009725~response to hormone stimulus                                     | 2.30E-03 |  |  |
|  |  | GO:0051146~striated muscle cell differentiation                             | 2.40E-03 |  |  |
|  |  | GO:0043270~positive regulation of ion transport                             | 2.40E-03 |  |  |
|  |  | GO:0051246~regulation of protein metabolic process                          | 2.50E-03 |  |  |
|  |  | GO:0050790~regulation of catalytic activity                                 | 2.60E-03 |  |  |
|  |  | GO:0031399~regulation of protein modification process                       | 2.80E-03 |  |  |
|  |  | GO:0009991~response to extracellular stimulus                               | 2.80E-03 |  |  |

|  |                                                                     |          |  |  |
|--|---------------------------------------------------------------------|----------|--|--|
|  | GO:0080090~regulation of primary metabolic process                  | 2.90E-03 |  |  |
|  | GO:0045191~regulation of isotype switching                          | 3.00E-03 |  |  |
|  | GO:0009887~organ morphogenesis                                      | 3.10E-03 |  |  |
|  | GO:0032268~regulation of cellular protein metabolic process         | 3.20E-03 |  |  |
|  | GO:0050776~regulation of immune response                            | 3.20E-03 |  |  |
|  | GO:0006355~regulation of transcription, DNA-dependent               | 3.30E-03 |  |  |
|  | GO:0045893~positive regulation of transcription, DNA-dependent      | 3.30E-03 |  |  |
|  | GO:0019884~antigen processing and presentation of exogenous antigen | 3.50E-03 |  |  |
|  | GO:0031323~regulation of cellular metabolic process                 | 3.50E-03 |  |  |
|  | GO:0051254~positive regulation of RNA metabolic process             | 3.50E-03 |  |  |
|  | GO:0040017~positive regulation of locomotion                        | 3.50E-03 |  |  |
|  | GO:0044057~regulation of system process                             | 3.60E-03 |  |  |
|  | GO:0050793~regulation of developmental process                      | 3.60E-03 |  |  |
|  | GO:0043269~regulation of ion transport                              | 3.70E-03 |  |  |
|  | GO:0007049~cell cycle                                               | 3.70E-03 |  |  |
|  | GO:0048584~positive regulation of response to stimulus              | 4.00E-03 |  |  |
|  | GO:0050864~regulation of B cell activation                          | 4.20E-03 |  |  |
|  | GO:0051252~regulation of RNA metabolic process                      | 4.30E-03 |  |  |
|  | GO:0045321~leukocyte activation                                     | 4.50E-03 |  |  |
|  | GO:0007154~cell communication                                       | 4.50E-03 |  |  |
|  | GO:0030334~regulation of cell migration                             | 4.50E-03 |  |  |
|  | GO:0007267~cell-cell signaling                                      | 4.80E-03 |  |  |

|  |  |                                                                   |          |  |  |
|--|--|-------------------------------------------------------------------|----------|--|--|
|  |  | GO:0008629~induction of apoptosis by intracellular signals        | 4.90E-03 |  |  |
|  |  | GO:0060541~respiratory system development                         | 5.00E-03 |  |  |
|  |  | GO:0051179~localization                                           | 5.00E-03 |  |  |
|  |  | GO:0010647~positive regulation of cell communication              | 5.00E-03 |  |  |
|  |  | GO:0055001~muscle cell development                                | 5.40E-03 |  |  |
|  |  | GO:0051054~positive regulation of DNA metabolic process           | 5.40E-03 |  |  |
|  |  | GO:0048729~tissue morphogenesis                                   | 5.90E-03 |  |  |
|  |  | GO:0051052~regulation of DNA metabolic process                    | 6.10E-03 |  |  |
|  |  | GO:0050927~positive regulation of positive chemotaxis             | 6.40E-03 |  |  |
|  |  | GO:0050926~regulation of positive chemotaxis                      | 6.40E-03 |  |  |
|  |  | GO:0032651~regulation of interleukin-1 beta production            | 7.10E-03 |  |  |
|  |  | GO:0042692~muscle cell differentiation                            | 7.40E-03 |  |  |
|  |  | GO:0001894~tissue homeostasis                                     | 7.60E-03 |  |  |
|  |  | GO:0048468~cell development                                       | 7.80E-03 |  |  |
|  |  | GO:0001912~positive regulation of leukocyte mediated cytotoxicity | 7.80E-03 |  |  |
|  |  | GO:0045884~regulation of survival gene product expression         | 7.80E-03 |  |  |
|  |  | GO:0001836~release of cytochrome c from mitochondria              | 7.80E-03 |  |  |
|  |  | GO:0051270~regulation of cell motion                              | 7.80E-03 |  |  |
|  |  | GO:0046649~lymphocyte activation                                  | 8.80E-03 |  |  |
|  |  | GO:0042698~ovulation cycle                                        | 8.90E-03 |  |  |
|  |  | GO:0032652~regulation of interleukin-1 production                 | 9.30E-03 |  |  |
|  |  | GO:0010035~response to                                            | 1.00E-02 |  |  |

|  |  |                                                                                                             |          |  |  |
|--|--|-------------------------------------------------------------------------------------------------------------|----------|--|--|
|  |  | inorganic substance                                                                                         |          |  |  |
|  |  | GO:0002712~regulation of B cell mediated immunity                                                           | 1.00E-02 |  |  |
|  |  | GO:0002889~regulation of immunoglobulin mediated immune response                                            | 1.00E-02 |  |  |
|  |  | GO:0050678~regulation of epithelial cell proliferation                                                      | 1.00E-02 |  |  |
|  |  | GO:0001666~response to hypoxia                                                                              | 1.10E-02 |  |  |
|  |  | GO:0001910~regulation of leukocyte mediated cytotoxicity                                                    | 1.10E-02 |  |  |
|  |  | GO:0007517~muscle organ development                                                                         | 1.10E-02 |  |  |
|  |  | GO:0030155~regulation of cell adhesion                                                                      | 1.10E-02 |  |  |
|  |  | GO:0002682~regulation of immune system process                                                              | 1.10E-02 |  |  |
|  |  | GO:0007005~mitochondrion organization                                                                       | 1.20E-02 |  |  |
|  |  | GO:0002637~regulation of immunoglobulin production                                                          | 1.20E-02 |  |  |
|  |  | GO:0045165~cell fate commitment                                                                             | 1.20E-02 |  |  |
|  |  | GO:0007584~response to nutrient                                                                             | 1.20E-02 |  |  |
|  |  | GO:0070482~response to oxygen levels                                                                        | 1.30E-02 |  |  |
|  |  | GO:0002477~antigen processing and presentation of exogenous peptide antigen via MHC class Ib                | 1.30E-02 |  |  |
|  |  | GO:0002428~antigen processing and presentation of peptide antigen via MHC class Ib                          | 1.30E-02 |  |  |
|  |  | GO:0002481~antigen processing and presentation of exogenous protein antigen via MHC class Ib, TAP-dependent | 1.30E-02 |  |  |
|  |  | GO:0001952~regulation of cell-matrix adhesion                                                               | 1.30E-02 |  |  |
|  |  | GO:0051050~positive regulation of transport                                                                 | 1.40E-02 |  |  |
|  |  | GO:0034097~response to cytokine stimulus                                                                    | 1.40E-02 |  |  |
|  |  | GO:0050921~positive                                                                                         | 1.50E-02 |  |  |

|  |  |                                                                        |          |  |  |
|--|--|------------------------------------------------------------------------|----------|--|--|
|  |  | regulation of chemotaxis                                               |          |  |  |
|  |  | GO:0001525~angiogenesis                                                | 1.50E-02 |  |  |
|  |  | GO:0010629~negative regulation of gene expression                      | 1.50E-02 |  |  |
|  |  | GO:0006461~protein complex assembly                                    | 1.50E-02 |  |  |
|  |  | GO:0070271~protein complex biogenesis                                  | 1.50E-02 |  |  |
|  |  | GO:0007423~sensory organ development                                   | 1.60E-02 |  |  |
|  |  | GO:0001501~skeletal system development                                 | 1.60E-02 |  |  |
|  |  | GO:0031644~regulation of neurological system process                   | 1.70E-02 |  |  |
|  |  | GO:0048661~positive regulation of smooth muscle cell proliferation     | 1.70E-02 |  |  |
|  |  | GO:0050920~regulation of chemotaxis                                    | 1.70E-02 |  |  |
|  |  | GO:0048871~multicellular organismal homeostasis                        | 1.70E-02 |  |  |
|  |  | GO:0030168~platelet activation                                         | 1.80E-02 |  |  |
|  |  | GO:0042246~tissue regeneration                                         | 1.80E-02 |  |  |
|  |  | GO:0010468~regulation of gene expression                               | 1.80E-02 |  |  |
|  |  | GO:0002684~positive regulation of immune system process                | 1.80E-02 |  |  |
|  |  | GO:0048589~developmental growth                                        | 1.80E-02 |  |  |
|  |  | GO:0050871~positive regulation of B cell activation                    | 1.90E-02 |  |  |
|  |  | GO:0051712~positive regulation of killing of cells of another organism | 1.90E-02 |  |  |
|  |  | GO:0043902~positive regulation of multi-organism process               | 1.90E-02 |  |  |
|  |  | GO:0014909~smooth muscle cell migration                                | 1.90E-02 |  |  |
|  |  | GO:0043009~chordate embryonic development                              | 1.90E-02 |  |  |
|  |  | GO:0030335~positive regulation of cell migration                       | 1.90E-02 |  |  |
|  |  | GO:0000060~protein import into nucleus, translocation                  | 2.00E-02 |  |  |

|  |  |                                                                    |          |  |  |
|--|--|--------------------------------------------------------------------|----------|--|--|
|  |  | GO:0034976~response to endoplasmic reticulum stress                | 2.00E-02 |  |  |
|  |  | GO:0048520~positive regulation of behavior                         | 2.00E-02 |  |  |
|  |  | GO:0001819~positive regulation of cytokine production              | 2.00E-02 |  |  |
|  |  | GO:0009792~embryonic development ending in birth or egg hatching   | 2.00E-02 |  |  |
|  |  | GO:0018193~peptidyl-amino acid modification                        | 2.00E-02 |  |  |
|  |  | GO:0006979~response to oxidative stress                            | 2.10E-02 |  |  |
|  |  | GO:0051241~negative regulation of multicellular organismal process | 2.10E-02 |  |  |
|  |  | GO:0006984~ER-nuclear signaling pathway                            | 2.10E-02 |  |  |
|  |  | GO:0008283~cell proliferation                                      | 2.10E-02 |  |  |
|  |  | GO:0016043~cellular component organization                         | 2.20E-02 |  |  |
|  |  | GO:0001707~mesoderm formation                                      | 2.20E-02 |  |  |
|  |  | GO:0030193~regulation of blood coagulation                         | 2.20E-02 |  |  |
|  |  | GO:0046907~intracellular transport                                 | 2.40E-02 |  |  |
|  |  | GO:0048332~mesoderm morphogenesis                                  | 2.40E-02 |  |  |
|  |  | GO:0051272~positive regulation of cell motion                      | 2.50E-02 |  |  |
|  |  | GO:0044085~cellular component biogenesis                           | 2.50E-02 |  |  |
|  |  | GO:0022607~cellular component assembly                             | 2.50E-02 |  |  |
|  |  | GO:0051890~regulation of cardioblast differentiation               | 2.50E-02 |  |  |
|  |  | GO:0051891~positive regulation of cardioblast differentiation      | 2.50E-02 |  |  |
|  |  | GO:0007262~STAT protein nuclear translocation                      | 2.50E-02 |  |  |
|  |  | GO:0051709~regulation of killing of cells of another organism      | 2.50E-02 |  |  |
|  |  | GO:0030324~lung development                                        | 2.50E-02 |  |  |

|  |  |                                                                                 |          |  |  |
|--|--|---------------------------------------------------------------------------------|----------|--|--|
|  |  | GO:0031396~regulation of protein ubiquitination                                 | 2.60E-02 |  |  |
|  |  | GO:0001704~formation of primary germ layer                                      | 2.70E-02 |  |  |
|  |  | GO:0007242~intracellular signaling cascade                                      | 2.70E-02 |  |  |
|  |  | GO:0030323~respiratory tube development                                         | 2.70E-02 |  |  |
|  |  | GO:0032269~negative regulation of cellular protein metabolic process            | 2.80E-02 |  |  |
|  |  | GO:0002700~regulation of production of molecular mediator of immune response    | 2.80E-02 |  |  |
|  |  | GO:0001541~ovarian follicle development                                         | 2.80E-02 |  |  |
|  |  | GO:0050818~regulation of coagulation                                            | 2.80E-02 |  |  |
|  |  | GO:0001817~regulation of cytokine production                                    | 2.80E-02 |  |  |
|  |  | GO:0051171~regulation of nitrogen compound metabolic process                    | 2.90E-02 |  |  |
|  |  | GO:0060249~anatomical structure homeostasis                                     | 3.00E-02 |  |  |
|  |  | GO:0045944~positive regulation of transcription from RNA polymerase II promoter | 3.10E-02 |  |  |
|  |  | GO:0031077~post-embryonic camera-type eye development                           | 3.10E-02 |  |  |
|  |  | GO:0002475~antigen processing and presentation via MHC class Ib                 | 3.10E-02 |  |  |
|  |  | GO:0014812~muscle cell migration                                                | 3.10E-02 |  |  |
|  |  | GO:0016337~cell-cell adhesion                                                   | 3.20E-02 |  |  |
|  |  | GO:0031401~positive regulation of protein modification process                  | 3.20E-02 |  |  |
|  |  | GO:0051248~negative regulation of protein metabolic process                     | 3.20E-02 |  |  |
|  |  | GO:0002699~positive regulation of immune effector process                       | 3.20E-02 |  |  |
|  |  | GO:0051641~cellular                                                             | 3.40E-02 |  |  |



|  |  |                                                                                              |          |  |  |
|--|--|----------------------------------------------------------------------------------------------|----------|--|--|
|  |  | localization                                                                                 |          |  |  |
|  |  | GO:0007155~cell adhesion                                                                     | 3.40E-02 |  |  |
|  |  | GO:0022610~biological adhesion                                                               | 3.40E-02 |  |  |
|  |  | GO:0010810~regulation of cell-substrate adhesion                                             | 3.50E-02 |  |  |
|  |  | GO:0050795~regulation of behavior                                                            | 3.50E-02 |  |  |
|  |  | GO:0008624~induction of apoptosis by extracellular signals                                   | 3.50E-02 |  |  |
|  |  | GO:0051174~regulation of phosphorus metabolic process                                        | 3.50E-02 |  |  |
|  |  | GO:0019220~regulation of phosphate metabolic process                                         | 3.50E-02 |  |  |
|  |  | GO:0051716~cellular response to stimulus                                                     | 3.60E-02 |  |  |
|  |  | GO:0032844~regulation of homeostatic process                                                 | 3.60E-02 |  |  |
|  |  | GO:0001503~ossification                                                                      | 3.70E-02 |  |  |
|  |  | GO:0045595~regulation of cell differentiation                                                | 3.70E-02 |  |  |
|  |  | GO:0032735~positive regulation of interleukin-12 production                                  | 3.80E-02 |  |  |
|  |  | GO:0048304~positive regulation of isotype switching to IgG isotypes                          | 3.80E-02 |  |  |
|  |  | GO:0019885~antigen processing and presentation of endogenous peptide antigen via MHC class I | 3.80E-02 |  |  |
|  |  | GO:0002483~antigen processing and presentation of endogenous peptide antigen                 | 3.80E-02 |  |  |
|  |  | GO:0006351~transcription, DNA-dependent                                                      | 3.90E-02 |  |  |
|  |  | GO:0009314~response to radiation                                                             | 3.90E-02 |  |  |
|  |  | GO:0009967~positive regulation of signal transduction                                        | 4.00E-02 |  |  |
|  |  | GO:0016202~regulation of striated muscle tissue development                                  | 4.00E-02 |  |  |
|  |  | GO:0031400~negative regulation of protein modification process                               | 4.00E-02 |  |  |

|  |  |                                                                                                         |          |  |  |
|--|--|---------------------------------------------------------------------------------------------------------|----------|--|--|
|  |  | GO:0032774~RNA biosynthetic process                                                                     | 4.10E-02 |  |  |
|  |  | GO:0006357~regulation of transcription from RNA polymerase II promoter                                  | 4.20E-02 |  |  |
|  |  | GO:0043524~negative regulation of neuron apoptosis                                                      | 4.20E-02 |  |  |
|  |  | GO:0048634~regulation of muscle development                                                             | 4.20E-02 |  |  |
|  |  | GO:0055002~striated muscle cell development                                                             | 4.30E-02 |  |  |
|  |  | GO:0010922~positive regulation of phosphatase activity                                                  | 4.40E-02 |  |  |
|  |  | GO:0001916~positive regulation of T cell mediated cytotoxicity                                          | 4.40E-02 |  |  |
|  |  | GO:0008634~negative regulation of survival gene product expression                                      | 4.40E-02 |  |  |
|  |  | GO:0051968~positive regulation of synaptic transmission, glutamatergic                                  | 4.40E-02 |  |  |
|  |  | GO:0060348~bone development                                                                             | 4.40E-02 |  |  |
|  |  | GO:0051649~establishment of localization in cell                                                        | 4.40E-02 |  |  |
|  |  | GO:0045934~negative regulation of nucleobase, nucleoside, nucleotide and nucleic acid metabolic process | 4.50E-02 |  |  |
|  |  | GO:0019219~regulation of nucleobase, nucleoside, nucleotide and nucleic acid metabolic process          | 4.50E-02 |  |  |
|  |  | GO:0048598~embryonic morphogenesis                                                                      | 4.60E-02 |  |  |
|  |  | GO:0009889~regulation of biosynthetic process                                                           | 4.70E-02 |  |  |
|  |  | GO:0034613~cellular protein localization                                                                | 4.70E-02 |  |  |
|  |  | GO:0051172~negative regulation of nitrogen compound metabolic process                                   | 4.80E-02 |  |  |
|  |  | GO:0010556~regulation of macromolecule biosynthetic process                                             | 4.80E-02 |  |  |
|  |  | GO:0048511~rhythmic                                                                                     | 4.80E-02 |  |  |

|                   |                                                                                                                                                                            |                                                                                 |          |                                              |          |
|-------------------|----------------------------------------------------------------------------------------------------------------------------------------------------------------------------|---------------------------------------------------------------------------------|----------|----------------------------------------------|----------|
|                   |                                                                                                                                                                            | process                                                                         |          |                                              |          |
|                   |                                                                                                                                                                            | GO:0070727~cellular macromolecule localization                                  | 4.90E-02 |                                              |          |
|                   |                                                                                                                                                                            | GO:0042493~response to drug                                                     | 4.90E-02 |                                              |          |
|                   |                                                                                                                                                                            | GO:0010038~response to metal ion                                                | 4.90E-02 |                                              |          |
| M <sub>(a6)</sub> | ugt1a9, ugt1a6, ugt2b15, slc35a2, ugt2b7, ugt1a4, ugt1a1, ugt1a7, ugt1a3, ugt1a10                                                                                          | GO:0006805~xenobiotic metabolic process                                         | 4.20E-03 | Ascorbate and aldarate metabolism            | 1.10E-05 |
|                   |                                                                                                                                                                            | GO:0009410~response to xenobiotic stimulus                                      | 4.90E-03 | Pentose and glucuronate interconversions     | 1.20E-05 |
|                   |                                                                                                                                                                            | GO:0006629~lipid metabolic process                                              | 9.60E-03 | Porphyrin and chlorophyll metabolism         | 4.10E-05 |
|                   |                                                                                                                                                                            | GO:0008202~steroid metabolic process                                            | 4.20E-02 | Androgen and estrogen metabolism             | 5.20E-05 |
|                   |                                                                                                                                                                            |                                                                                 |          | Starch and sucrose metabolism                | 6.70E-05 |
|                   |                                                                                                                                                                            |                                                                                 |          | Drug metabolism                              | 7.00E-05 |
|                   |                                                                                                                                                                            |                                                                                 |          | Steroid hormone biosynthesis                 | 8.00E-05 |
|                   |                                                                                                                                                                            |                                                                                 |          | Retinol metabolism                           | 1.10E-04 |
|                   |                                                                                                                                                                            |                                                                                 |          | Metabolism of xenobiotics by cytochrome P450 | 1.40E-04 |
|                   |                                                                                                                                                                            |                                                                                 |          | Drug metabolism                              | 1.50E-04 |
|                   |                                                                                                                                                                            |                                                                                 |          |                                              |          |
| M <sub>(a7)</sub> | apoe, apoa2, apoa1, nqo1, apob, apoa4, selp, ttr, sod2, nfe2l2, apoc3, gabpa, apoh, ros1, hmox1, scarb1, apom, s1pr2, s1pr3, pah, a2m, il1b, hsd11b1, mbtps1, s1pr1, abca1 | -                                                                               |          | PPAR signaling pathway                       | 1.50E-02 |
| M <sub>(a8)</sub> | vhl, iqsec1, lrn1, foxp1, fgf5, gna12, bcl6, aldh1l1, ctdspl                                                                                                               | GO:0042127~regulation of cell proliferation                                     | 3.00E-03 | -                                            |          |
|                   |                                                                                                                                                                            | GO:0046578~regulation of Ras protein signal transduction                        | 3.20E-03 |                                              |          |
|                   |                                                                                                                                                                            | GO:0051056~regulation of small GTPase mediated signal transduction              | 4.50E-03 |                                              |          |
|                   |                                                                                                                                                                            | GO:0000122~negative regulation of transcription from RNA polymerase II promoter | 5.00E-03 |                                              |          |
|                   |                                                                                                                                                                            | GO:0010646~regulation of cell communication                                     | 6.70E-03 |                                              |          |
|                   |                                                                                                                                                                            | GO:0045892~negative                                                             | 8.90E-03 |                                              |          |

|  |  |                                                                                                         |          |  |  |
|--|--|---------------------------------------------------------------------------------------------------------|----------|--|--|
|  |  | regulation of transcription, DNA-dependent                                                              |          |  |  |
|  |  | GO:0051253~negative regulation of RNA metabolic process                                                 | 9.20E-03 |  |  |
|  |  | GO:0002637~regulation of immunoglobulin production                                                      | 1.10E-02 |  |  |
|  |  | GO:0032319~regulation of Rho GTPase activity                                                            | 1.20E-02 |  |  |
|  |  | GO:0008284~positive regulation of cell proliferation                                                    | 1.20E-02 |  |  |
|  |  | GO:0016481~negative regulation of transcription                                                         | 1.50E-02 |  |  |
|  |  | GO:0002700~regulation of production of molecular mediator of immune response                            | 1.70E-02 |  |  |
|  |  | GO:0010629~negative regulation of gene expression                                                       | 1.70E-02 |  |  |
|  |  | GO:0045934~negative regulation of nucleobase, nucleoside, nucleotide and nucleic acid metabolic process | 1.80E-02 |  |  |
|  |  | GO:0051172~negative regulation of nitrogen compound metabolic process                                   | 1.80E-02 |  |  |
|  |  | GO:0030183~B cell differentiation                                                                       | 2.00E-02 |  |  |
|  |  | GO:0010558~negative regulation of macromolecule biosynthetic process                                    | 2.00E-02 |  |  |
|  |  | GO:0031327~negative regulation of cellular biosynthetic process                                         | 2.10E-02 |  |  |
|  |  | GO:0009890~negative regulation of biosynthetic process                                                  | 2.20E-02 |  |  |
|  |  | GO:0048523~negative regulation of cellular process                                                      | 2.50E-02 |  |  |
|  |  | GO:0050793~regulation of developmental process                                                          | 3.00E-02 |  |  |
|  |  | GO:0048519~negative regulation of biological process                                                    | 3.10E-02 |  |  |
|  |  | GO:0042113~B cell activation                                                                            | 3.20E-02 |  |  |
|  |  | GO:0048522~positive regulation of cellular process                                                      | 3.30E-02 |  |  |
|  |  | GO:0031324~negative regulation of cellular                                                              | 3.40E-02 |  |  |

|                    |                                                           |                                                                        |          |   |  |
|--------------------|-----------------------------------------------------------|------------------------------------------------------------------------|----------|---|--|
|                    |                                                           | metabolic process                                                      |          |   |  |
|                    |                                                           | GO:0006357~regulation of transcription from RNA polymerase II promoter | 3.50E-02 |   |  |
|                    |                                                           | GO:0010605~negative regulation of macromolecule metabolic process      | 3.50E-02 |   |  |
|                    |                                                           | GO:0009892~negative regulation of metabolic process                    | 3.90E-02 |   |  |
|                    |                                                           | GO:0035023~regulation of Rho protein signal transduction               | 4.10E-02 |   |  |
|                    |                                                           | GO:0002697~regulation of immune effector process                       | 4.20E-02 |   |  |
|                    |                                                           | GO:0048518~positive regulation of biological process                   | 4.20E-02 |   |  |
|                    |                                                           | GO:0030098~lymphocyte differentiation                                  | 4.30E-02 |   |  |
|                    |                                                           | GO:0032318~regulation of Ras GTPase activity                           | 4.30E-02 |   |  |
|                    |                                                           | GO:0050790~regulation of catalytic activity                            | 4.60E-02 |   |  |
|                    |                                                           | GO:0009966~regulation of signal transduction                           | 4.90E-02 |   |  |
| M <sub>(a9)</sub>  | sco1, slc39a8, fcgr3b, c3ar1, retn, rad21, slc3a2, lrcc25 | GO:0030001~metal ion transport                                         | 1.50E-02 | - |  |
|                    |                                                           | GO:0006812~cation transport                                            | 2.10E-02 |   |  |
|                    |                                                           | GO:0000041~transition metal ion transport                              | 3.00E-02 |   |  |
|                    |                                                           | GO:0006811~ion transport                                               | 3.80E-02 |   |  |
| M <sub>(a10)</sub> | flt1, phactr1, cbs, lpl, psrc1, cnm2, cdkn2b              | GO:0048522~positive regulation of cellular process                     | 1.30E-03 | - |  |
|                    |                                                           | GO:0048518~positive regulation of biological process                   | 2.00E-03 |   |  |
|                    |                                                           | GO:0050794~regulation of cellular process                              | 9.50E-03 |   |  |
|                    |                                                           | GO:0009966~regulation of signal transduction                           | 1.10E-02 |   |  |
|                    |                                                           | GO:0050789~regulation of biological process                            | 1.20E-02 |   |  |
|                    |                                                           | GO:0010646~regulation of cell communication                            | 1.30E-02 |   |  |
|                    |                                                           | GO:0065007~biological regulation                                       | 1.60E-02 |   |  |

|  |  |                                                  |          |  |  |
|--|--|--------------------------------------------------|----------|--|--|
|  |  | GO:0016053~organic acid biosynthetic process     | 4.00E-02 |  |  |
|  |  | GO:0046394~carboxylic acid biosynthetic process  | 4.00E-02 |  |  |
|  |  | GO:0045859~regulation of protein kinase activity | 4.60E-02 |  |  |
|  |  | GO:0043549~regulation of kinase activity         | 4.90E-02 |  |  |
